# Supplementary material for: Evolving epigenomics of immune cells in type 1 diabetes at single nuclei resolution
Source: Research Square preprint supplement (doi:10.21203/rs.3.rs-5588592/v1), 2025-03-25
Supplement: Supplementary file 1 [file 7533cccfbaa64891f4f5272b.xlsx]

## Sheet: Supplementary Table 1
sample_ID	dataset	timepoint	condition	n_cells
sample_1_case	ATAC	1	case	921
sample_1_case	ATAC	2	case	697
sample_1_case	ATAC	3	case	873
sample_2_case	ATAC	1	case	484
sample_2_case	ATAC	2	case	1579
sample_2_case	ATAC	3	case	330
sample_50_control	ATAC	1	control	886
sample_50_control	ATAC	2	control	758
sample_50_control	ATAC	3	control	890
sample_51_control	ATAC	1	control	1424
sample_51_control	ATAC	2	control	2183
sample_51_control	ATAC	3	control	686
sample_3_case	ATAC	1	case	1056
sample_3_case	ATAC	2	case	851
sample_3_case	ATAC	3	case	349
sample_4_case	ATAC	1	case	943
sample_4_case	ATAC	2	case	601
sample_4_case	ATAC	3	case	493
sample_5_case	ATAC	1	case	1923
sample_5_case	ATAC	2	case	696
sample_5_case	ATAC	3	case	771
sample_52_control	ATAC	1	control	1289
sample_52_control	ATAC	2	control	1457
sample_52_control	ATAC	3	control	932
sample_6_case	ATAC	1	case	1039
sample_6_case	ATAC	2	case	489
sample_6_case	ATAC	3	case	322
sample_53_control	ATAC	1	control	781
sample_53_control	ATAC	2	control	337
sample_53_control	ATAC	3	control	530
sample_7_case	ATAC	1	case	295
sample_7_case	ATAC	3	case	530
sample_54_control	ATAC	1	control	1349
sample_54_control	ATAC	2	control	868
sample_8_case	ATAC	1	case	431
sample_8_case	ATAC	2	case	560
sample_9_case	ATAC	1	case	796
sample_9_case	ATAC	2	case	49
sample_9_case	ATAC	3	case	446
sample_10_case	ATAC	1	case	809
sample_10_case	ATAC	2	case	441
sample_10_case	ATAC	3	case	578
sample_11_case	ATAC	1	case	441
sample_11_case	ATAC	2	case	518
sample_11_case	ATAC	3	case	988
sample_12_case	ATAC	1	case	645
sample_12_case	ATAC	2	case	1001
sample_12_case	ATAC	3	case	1816
sample_55_control	ATAC	1	control	603
sample_55_control	ATAC	2	control	1573
sample_13_case	ATAC	1	case	1375
sample_13_case	ATAC	2	case	640
sample_13_case	ATAC	3	case	528
sample_14_case	ATAC	1	case	793
sample_14_case	ATAC	2	case	136
sample_14_case	ATAC	3	case	870
sample_56_control	ATAC	1	control	938
sample_56_control	ATAC	2	control	1294
sample_56_control	ATAC	3	control	1105
sample_57_control	ATAC	1	control	1118
sample_57_control	ATAC	2	control	1227
sample_57_control	ATAC	3	control	1208
sample_58_control	ATAC	1	control	512
sample_58_control	ATAC	2	control	1085
sample_58_control	ATAC	3	control	854
sample_15_case	ATAC	1	case	957
sample_15_case	ATAC	2	case	1401
sample_15_case	ATAC	3	case	1334
sample_59_control	ATAC	1	control	1025
sample_59_control	ATAC	2	control	714
sample_59_control	ATAC	3	control	792
sample_16_case	ATAC	1	case	723
sample_16_case	ATAC	2	case	740
sample_16_case	ATAC	3	case	1299
sample_17_case	ATAC	1	case	851
sample_17_case	ATAC	2	case	365
sample_17_case	ATAC	3	case	861
sample_18_case	ATAC	1	case	612
sample_18_case	ATAC	2	case	1282
sample_18_case	ATAC	3	case	900
sample_19_case	ATAC	1	case	1056
sample_19_case	ATAC	2	case	807
sample_19_case	ATAC	3	case	575
sample_20_case	ATAC	1	case	633
sample_20_case	ATAC	2	case	632
sample_20_case	ATAC	3	case	428
sample_60_control	ATAC	1	control	1296
sample_60_control	ATAC	2	control	1239
sample_60_control	ATAC	3	control	1205
sample_21_case	ATAC	1	case	1343
sample_21_case	ATAC	2	case	1016
sample_21_case	ATAC	3	case	1726
sample_61_control	ATAC	1	control	841
sample_61_control	ATAC	2	control	1172
sample_61_control	ATAC	3	control	1474
sample_62_control	ATAC	1	control	814
sample_62_control	ATAC	2	control	703
sample_62_control	ATAC	3	control	661
sample_22_case	ATAC	1	case	1858
sample_22_case	ATAC	2	case	318
sample_22_case	ATAC	3	case	553
sample_23_case	ATAC	1	case	970
sample_23_case	ATAC	2	case	1808
sample_23_case	ATAC	3	case	481
sample_63_control	ATAC	1	control	418
sample_63_control	ATAC	3	control	521
sample_64_control	ATAC	1	control	729
sample_64_control	ATAC	2	control	948
sample_64_control	ATAC	3	control	711
sample_65_control	ATAC	1	control	1691
sample_65_control	ATAC	2	control	1494
sample_65_control	ATAC	3	control	714
sample_66_control	ATAC	1	control	943
sample_66_control	ATAC	2	control	85
sample_66_control	ATAC	3	control	698
sample_67_control	ATAC	1	control	750
sample_67_control	ATAC	2	control	633
sample_67_control	ATAC	3	control	446
sample_24_case	ATAC	1	case	431
sample_24_case	ATAC	2	case	689
sample_24_case	ATAC	3	case	778
sample_68_control	ATAC	1	control	1067
sample_68_control	ATAC	2	control	470
sample_68_control	ATAC	3	control	1019
sample_25_case	ATAC	1	case	1196
sample_25_case	ATAC	2	case	851
sample_25_case	ATAC	3	case	628
sample_26_case	ATAC	1	case	887
sample_26_case	ATAC	2	case	347
sample_26_case	ATAC	3	case	1045
sample_69_control	ATAC	1	control	738
sample_69_control	ATAC	2	control	1011
sample_69_control	ATAC	3	control	1195
sample_70_control	ATAC	1	control	695
sample_70_control	ATAC	2	control	784
sample_71_control	ATAC	1	control	1051
sample_71_control	ATAC	2	control	871
sample_71_control	ATAC	3	control	1173
sample_27_case	ATAC	1	case	972
sample_27_case	ATAC	2	case	1486
sample_27_case	ATAC	3	case	1674
sample_28_case	ATAC	1	case	767
sample_28_case	ATAC	2	case	1257
sample_28_case	ATAC	3	case	1818
sample_72_control	ATAC	1	control	122
sample_72_control	ATAC	2	control	363
sample_72_control	ATAC	3	control	721
sample_73_control	ATAC	1	control	1430
sample_73_control	ATAC	2	control	225
sample_73_control	ATAC	3	control	694
sample_29_case	ATAC	1	case	589
sample_29_case	ATAC	3	case	1537
sample_74_control	ATAC	1	control	1451
sample_74_control	ATAC	2	control	1717
sample_74_control	ATAC	3	control	551
sample_75_control	ATAC	1	control	837
sample_75_control	ATAC	2	control	857
sample_75_control	ATAC	3	control	1038
sample_30_case	ATAC	1	case	276
sample_30_case	ATAC	3	case	671
sample_76_control	ATAC	1	control	1327
sample_76_control	ATAC	2	control	68
sample_76_control	ATAC	3	control	1331
sample_31_case	ATAC	1	case	1388
sample_31_case	ATAC	2	case	2058
sample_31_case	ATAC	3	case	1415
sample_77_control	ATAC	1	control	1332
sample_77_control	ATAC	3	control	755
sample_32_case	ATAC	1	case	1197
sample_32_case	ATAC	2	case	214
sample_32_case	ATAC	3	case	1238
sample_78_control	ATAC	1	control	1563
sample_78_control	ATAC	2	control	376
sample_78_control	ATAC	3	control	1184
sample_79_control	ATAC	1	control	687
sample_79_control	ATAC	2	control	546
sample_79_control	ATAC	3	control	487
sample_80_control	ATAC	1	control	864
sample_80_control	ATAC	2	control	1122
sample_80_control	ATAC	3	control	1409
sample_33_case	ATAC	1	case	1412
sample_33_case	ATAC	2	case	1640
sample_33_case	ATAC	3	case	1204
sample_81_control	ATAC	1	control	660
sample_81_control	ATAC	2	control	1252
sample_81_control	ATAC	3	control	1525
sample_82_control	ATAC	1	control	731
sample_82_control	ATAC	2	control	2057
sample_82_control	ATAC	3	control	2059
sample_34_case	ATAC	1	case	771
sample_34_case	ATAC	2	case	915
sample_34_case	ATAC	3	case	1430
sample_83_control	ATAC	1	control	2645
sample_83_control	ATAC	2	control	880
sample_83_control	ATAC	3	control	1246
sample_84_control	ATAC	1	control	1097
sample_84_control	ATAC	2	control	1634
sample_84_control	ATAC	3	control	416
sample_35_case	ATAC	1	case	1183
sample_35_case	ATAC	3	case	749
sample_85_control	ATAC	1	control	639
sample_85_control	ATAC	3	control	1362
sample_86_control	ATAC	1	control	1609
sample_86_control	ATAC	2	control	1411
sample_86_control	ATAC	3	control	1149
sample_36_case	ATAC	1	case	560
sample_36_case	ATAC	2	case	844
sample_36_case	ATAC	3	case	898
sample_87_control	ATAC	1	control	604
sample_87_control	ATAC	2	control	800
sample_87_control	ATAC	3	control	1370
sample_88_control	ATAC	1	control	467
sample_88_control	ATAC	2	control	508
sample_88_control	ATAC	3	control	1237
sample_89_control	ATAC	1	control	620
sample_89_control	ATAC	2	control	1155
sample_89_control	ATAC	3	control	1672
sample_90_control	ATAC	1	control	967
sample_90_control	ATAC	2	control	1009
sample_90_control	ATAC	3	control	934
sample_37_case	ATAC	1	case	938
sample_37_case	ATAC	2	case	1256
sample_37_case	ATAC	3	case	1635
sample_38_case	ATAC	1	case	297
sample_38_case	ATAC	2	case	181
sample_91_control	ATAC	1	control	556
sample_91_control	ATAC	2	control	1706
sample_91_control	ATAC	3	control	1027
sample_39_case	ATAC	1	case	352
sample_39_case	ATAC	2	case	1776
sample_39_case	ATAC	3	case	1262
sample_92_control	ATAC	1	control	1568
sample_92_control	ATAC	2	control	1206
sample_92_control	ATAC	3	control	648
sample_93_control	ATAC	1	control	1403
sample_93_control	ATAC	2	control	312
sample_93_control	ATAC	3	control	743
sample_94_control	ATAC	1	control	891
sample_94_control	ATAC	2	control	1215
sample_94_control	ATAC	3	control	1001
sample_95_control	ATAC	1	control	725
sample_95_control	ATAC	2	control	1314
sample_95_control	ATAC	3	control	1078
sample_40_case	ATAC	1	case	664
sample_40_case	ATAC	2	case	979
sample_40_case	ATAC	3	case	685
sample_41_case	ATAC	1	case	1396
sample_41_case	ATAC	2	case	977
sample_41_case	ATAC	3	case	1466
sample_96_control	ATAC	1	control	868
sample_96_control	ATAC	2	control	1007
sample_96_control	ATAC	3	control	582
sample_42_case	ATAC	1	case	950
sample_42_case	ATAC	2	case	889
sample_42_case	ATAC	3	case	671
sample_43_case	ATAC	1	case	1330
sample_43_case	ATAC	2	case	683
sample_43_case	ATAC	3	case	1029
sample_97_control	ATAC	1	control	785
sample_97_control	ATAC	2	control	865
sample_97_control	ATAC	3	control	713
sample_44_case	ATAC	1	case	550
sample_44_case	ATAC	2	case	930
sample_44_case	ATAC	3	case	1329
sample_45_case	ATAC	1	case	1273
sample_45_case	ATAC	2	case	873
sample_45_case	ATAC	3	case	1208
sample_46_case	ATAC	1	case	341
sample_46_case	ATAC	2	case	662
sample_46_case	ATAC	3	case	541
sample_47_case	ATAC	1	case	471
sample_47_case	ATAC	2	case	1056
sample_48_case	ATAC	1	case	598
sample_48_case	ATAC	2	case	1809
sample_48_case	ATAC	3	case	910
sample_98_control	ATAC	1	control	803
sample_98_control	ATAC	3	control	289
sample_49_case	ATAC	1	case	989
sample_49_case	ATAC	2	case	896
sample_49_case	ATAC	3	case	1054
sample_1_case	multiome	1	case	555
sample_1_case	multiome	2	case	555
sample_1_case	multiome	3	case	651
sample_2_case	multiome	1	case	298
sample_2_case	multiome	2	case	1119
sample_2_case	multiome	3	case	269
sample_50_control	multiome	1	control	553
sample_50_control	multiome	2	control	558
sample_50_control	multiome	3	control	617
sample_51_control	multiome	1	control	832
sample_51_control	multiome	2	control	1597
sample_51_control	multiome	3	control	531
sample_3_case	multiome	1	case	659
sample_3_case	multiome	2	case	653
sample_3_case	multiome	3	case	256
sample_4_case	multiome	1	case	569
sample_4_case	multiome	2	case	447
sample_4_case	multiome	3	case	350
sample_5_case	multiome	1	case	1157
sample_5_case	multiome	2	case	523
sample_5_case	multiome	3	case	516
sample_52_control	multiome	1	control	843
sample_52_control	multiome	2	control	1146
sample_52_control	multiome	3	control	675
sample_6_case	multiome	1	case	602
sample_6_case	multiome	2	case	381
sample_6_case	multiome	3	case	235
sample_53_control	multiome	1	control	433
sample_53_control	multiome	2	control	227
sample_53_control	multiome	3	control	351
sample_7_case	multiome	1	case	227
sample_7_case	multiome	3	case	392
sample_54_control	multiome	1	control	999
sample_54_control	multiome	2	control	601
sample_8_case	multiome	1	case	338
sample_8_case	multiome	2	case	400
sample_9_case	multiome	1	case	439
sample_9_case	multiome	2	case	41
sample_9_case	multiome	3	case	300
sample_10_case	multiome	1	case	492
sample_10_case	multiome	2	case	308
sample_10_case	multiome	3	case	354
sample_11_case	multiome	1	case	278
sample_11_case	multiome	2	case	358
sample_11_case	multiome	3	case	719
sample_12_case	multiome	1	case	381
sample_12_case	multiome	2	case	765
sample_12_case	multiome	3	case	1326
sample_55_control	multiome	1	control	333
sample_55_control	multiome	2	control	1104
sample_13_case	multiome	1	case	858
sample_13_case	multiome	2	case	480
sample_13_case	multiome	3	case	347
sample_14_case	multiome	1	case	520
sample_14_case	multiome	2	case	118
sample_14_case	multiome	3	case	610
sample_56_control	multiome	1	control	621
sample_56_control	multiome	2	control	1019
sample_56_control	multiome	3	control	821
sample_57_control	multiome	1	control	672
sample_57_control	multiome	2	control	871
sample_57_control	multiome	3	control	889
sample_58_control	multiome	1	control	325
sample_58_control	multiome	2	control	779
sample_58_control	multiome	3	control	628
sample_15_case	multiome	1	case	612
sample_15_case	multiome	2	case	1044
sample_15_case	multiome	3	case	1033
sample_59_control	multiome	1	control	551
sample_59_control	multiome	2	control	535
sample_59_control	multiome	3	control	577
sample_16_case	multiome	1	case	486
sample_16_case	multiome	2	case	514
sample_16_case	multiome	3	case	872
sample_17_case	multiome	1	case	516
sample_17_case	multiome	2	case	299
sample_17_case	multiome	3	case	628
sample_18_case	multiome	1	case	414
sample_18_case	multiome	2	case	986
sample_18_case	multiome	3	case	645
sample_19_case	multiome	1	case	643
sample_19_case	multiome	2	case	594
sample_19_case	multiome	3	case	427
sample_20_case	multiome	1	case	421
sample_20_case	multiome	2	case	495
sample_20_case	multiome	3	case	285
sample_60_control	multiome	1	control	874
sample_60_control	multiome	2	control	946
sample_60_control	multiome	3	control	866
sample_21_case	multiome	1	case	957
sample_21_case	multiome	2	case	812
sample_21_case	multiome	3	case	1223
sample_61_control	multiome	1	control	557
sample_61_control	multiome	2	control	886
sample_61_control	multiome	3	control	1075
sample_62_control	multiome	1	control	525
sample_62_control	multiome	2	control	519
sample_62_control	multiome	3	control	453
sample_22_case	multiome	1	case	1202
sample_22_case	multiome	2	case	265
sample_22_case	multiome	3	case	394
sample_23_case	multiome	1	case	663
sample_23_case	multiome	2	case	1451
sample_23_case	multiome	3	case	329
sample_63_control	multiome	1	control	311
sample_63_control	multiome	3	control	367
sample_64_control	multiome	1	control	520
sample_64_control	multiome	2	control	724
sample_64_control	multiome	3	control	519
sample_65_control	multiome	1	control	1150
sample_65_control	multiome	2	control	1117
sample_65_control	multiome	3	control	507
sample_66_control	multiome	1	control	599
sample_66_control	multiome	2	control	77
sample_66_control	multiome	3	control	512
sample_67_control	multiome	1	control	505
sample_67_control	multiome	2	control	465
sample_67_control	multiome	3	control	301
sample_24_case	multiome	1	case	307
sample_24_case	multiome	2	case	528
sample_24_case	multiome	3	case	518
sample_68_control	multiome	1	control	698
sample_68_control	multiome	2	control	352
sample_68_control	multiome	3	control	730
sample_25_case	multiome	1	case	807
sample_25_case	multiome	2	case	630
sample_25_case	multiome	3	case	464
sample_26_case	multiome	1	case	514
sample_26_case	multiome	2	case	257
sample_26_case	multiome	3	case	762
sample_69_control	multiome	1	control	508
sample_69_control	multiome	2	control	832
sample_69_control	multiome	3	control	927
sample_70_control	multiome	1	control	516
sample_70_control	multiome	2	control	609
sample_71_control	multiome	1	control	630
sample_71_control	multiome	2	control	693
sample_71_control	multiome	3	control	806
sample_27_case	multiome	1	case	610
sample_27_case	multiome	2	case	1106
sample_27_case	multiome	3	case	1168
sample_28_case	multiome	1	case	457
sample_28_case	multiome	2	case	939
sample_28_case	multiome	3	case	1313
sample_72_control	multiome	1	control	89
sample_72_control	multiome	2	control	281
sample_72_control	multiome	3	control	501
sample_73_control	multiome	1	control	943
sample_73_control	multiome	2	control	175
sample_73_control	multiome	3	control	470
sample_29_case	multiome	1	case	425
sample_29_case	multiome	3	case	1162
sample_74_control	multiome	1	control	1022
sample_74_control	multiome	2	control	1266
sample_74_control	multiome	3	control	398
sample_75_control	multiome	1	control	577
sample_75_control	multiome	2	control	674
sample_75_control	multiome	3	control	711
sample_30_case	multiome	1	case	195
sample_30_case	multiome	3	case	491
sample_76_control	multiome	1	control	906
sample_76_control	multiome	2	control	66
sample_76_control	multiome	3	control	966
sample_31_case	multiome	1	case	978
sample_31_case	multiome	2	case	1645
sample_31_case	multiome	3	case	1065
sample_77_control	multiome	1	control	919
sample_77_control	multiome	3	control	565
sample_32_case	multiome	1	case	800
sample_32_case	multiome	2	case	158
sample_32_case	multiome	3	case	946
sample_78_control	multiome	1	control	1016
sample_78_control	multiome	2	control	274
sample_78_control	multiome	3	control	877
sample_79_control	multiome	1	control	421
sample_79_control	multiome	2	control	406
sample_79_control	multiome	3	control	338
sample_80_control	multiome	1	control	526
sample_80_control	multiome	2	control	805
sample_80_control	multiome	3	control	1003
sample_33_case	multiome	1	case	873
sample_33_case	multiome	2	case	1244
sample_33_case	multiome	3	case	896
sample_81_control	multiome	1	control	432
sample_81_control	multiome	2	control	981
sample_81_control	multiome	3	control	1078
sample_82_control	multiome	1	control	468
sample_82_control	multiome	2	control	1502
sample_82_control	multiome	3	control	1531
sample_34_case	multiome	1	case	521
sample_34_case	multiome	2	case	696
sample_34_case	multiome	3	case	1027
sample_83_control	multiome	1	control	1821
sample_83_control	multiome	2	control	686
sample_83_control	multiome	3	control	921
sample_84_control	multiome	1	control	702
sample_84_control	multiome	2	control	1236
sample_84_control	multiome	3	control	295
sample_35_case	multiome	1	case	769
sample_35_case	multiome	3	case	515
sample_85_control	multiome	1	control	451
sample_85_control	multiome	3	control	979
sample_86_control	multiome	1	control	957
sample_86_control	multiome	2	control	1044
sample_86_control	multiome	3	control	822
sample_36_case	multiome	1	case	368
sample_36_case	multiome	2	case	631
sample_36_case	multiome	3	case	642
sample_87_control	multiome	1	control	365
sample_87_control	multiome	2	control	591
sample_87_control	multiome	3	control	1044
sample_88_control	multiome	1	control	318
sample_88_control	multiome	2	control	380
sample_88_control	multiome	3	control	873
sample_89_control	multiome	1	control	440
sample_89_control	multiome	2	control	885
sample_89_control	multiome	3	control	1156
sample_90_control	multiome	1	control	633
sample_90_control	multiome	2	control	755
sample_90_control	multiome	3	control	692
sample_37_case	multiome	1	case	612
sample_37_case	multiome	2	case	945
sample_37_case	multiome	3	case	1153
sample_38_case	multiome	1	case	187
sample_38_case	multiome	2	case	141
sample_91_control	multiome	1	control	359
sample_91_control	multiome	2	control	1254
sample_91_control	multiome	3	control	711
sample_39_case	multiome	1	case	243
sample_39_case	multiome	2	case	1405
sample_39_case	multiome	3	case	949
sample_92_control	multiome	1	control	1082
sample_92_control	multiome	2	control	968
sample_92_control	multiome	3	control	490
sample_93_control	multiome	1	control	778
sample_93_control	multiome	2	control	232
sample_93_control	multiome	3	control	534
sample_94_control	multiome	1	control	548
sample_94_control	multiome	2	control	922
sample_94_control	multiome	3	control	698
sample_95_control	multiome	1	control	480
sample_95_control	multiome	2	control	1028
sample_95_control	multiome	3	control	736
sample_40_case	multiome	1	case	419
sample_40_case	multiome	2	case	721
sample_40_case	multiome	3	case	492
sample_41_case	multiome	1	case	967
sample_41_case	multiome	2	case	766
sample_41_case	multiome	3	case	1042
sample_96_control	multiome	1	control	551
sample_96_control	multiome	2	control	765
sample_96_control	multiome	3	control	437
sample_42_case	multiome	1	case	592
sample_42_case	multiome	2	case	676
sample_42_case	multiome	3	case	508
sample_43_case	multiome	1	case	958
sample_43_case	multiome	2	case	491
sample_43_case	multiome	3	case	756
sample_97_control	multiome	1	control	492
sample_97_control	multiome	2	control	653
sample_97_control	multiome	3	control	525
sample_44_case	multiome	1	case	368
sample_44_case	multiome	2	case	683
sample_44_case	multiome	3	case	1018
sample_45_case	multiome	1	case	912
sample_45_case	multiome	2	case	662
sample_45_case	multiome	3	case	899
sample_46_case	multiome	1	case	245
sample_46_case	multiome	2	case	508
sample_46_case	multiome	3	case	376
sample_47_case	multiome	1	case	343
sample_47_case	multiome	2	case	734
sample_48_case	multiome	1	case	402
sample_48_case	multiome	2	case	1384
sample_48_case	multiome	3	case	660
sample_98_control	multiome	1	control	542
sample_98_control	multiome	3	control	219
sample_49_case	multiome	1	case	674
sample_49_case	multiome	2	case	701
sample_49_case	multiome	3	case	773
sample_1_case	RNA	1	case	840
sample_1_case	RNA	2	case	539
sample_1_case	RNA	3	case	603
sample_2_case	RNA	1	case	499
sample_2_case	RNA	2	case	1428
sample_2_case	RNA	3	case	217
sample_50_control	RNA	1	control	767
sample_50_control	RNA	2	control	650
sample_50_control	RNA	3	control	589
sample_51_control	RNA	1	control	940
sample_51_control	RNA	2	control	1810
sample_51_control	RNA	3	control	304
sample_3_case	RNA	1	case	766
sample_3_case	RNA	2	case	547
sample_3_case	RNA	3	case	194
sample_4_case	RNA	1	case	569
sample_4_case	RNA	2	case	439
sample_4_case	RNA	3	case	339
sample_5_case	RNA	1	case	1733
sample_5_case	RNA	2	case	532
sample_5_case	RNA	3	case	542
sample_52_control	RNA	1	control	688
sample_52_control	RNA	2	control	889
sample_52_control	RNA	3	control	381
sample_6_case	RNA	1	case	890
sample_6_case	RNA	2	case	281
sample_6_case	RNA	3	case	217
sample_53_control	RNA	1	control	674
sample_53_control	RNA	2	control	362
sample_53_control	RNA	3	control	309
sample_7_case	RNA	1	case	240
sample_7_case	RNA	3	case	324
sample_54_control	RNA	1	control	1267
sample_54_control	RNA	2	control	573
sample_8_case	RNA	1	case	497
sample_8_case	RNA	2	case	448
sample_9_case	RNA	1	case	637
sample_9_case	RNA	2	case	10
sample_9_case	RNA	3	case	327
sample_10_case	RNA	1	case	638
sample_10_case	RNA	2	case	407
sample_10_case	RNA	3	case	582
sample_11_case	RNA	1	case	266
sample_11_case	RNA	2	case	487
sample_11_case	RNA	3	case	660
sample_12_case	RNA	1	case	471
sample_12_case	RNA	2	case	853
sample_12_case	RNA	3	case	1119
sample_55_control	RNA	1	control	355
sample_55_control	RNA	2	control	1134
sample_13_case	RNA	1	case	1147
sample_13_case	RNA	2	case	604
sample_13_case	RNA	3	case	544
sample_14_case	RNA	1	case	635
sample_14_case	RNA	2	case	42
sample_14_case	RNA	3	case	673
sample_56_control	RNA	1	control	579
sample_56_control	RNA	2	control	810
sample_56_control	RNA	3	control	883
sample_57_control	RNA	1	control	643
sample_57_control	RNA	2	control	860
sample_57_control	RNA	3	control	643
sample_58_control	RNA	1	control	408
sample_58_control	RNA	2	control	965
sample_58_control	RNA	3	control	543
sample_15_case	RNA	1	case	777
sample_15_case	RNA	2	case	875
sample_15_case	RNA	3	case	641
sample_59_control	RNA	1	control	968
sample_59_control	RNA	2	control	604
sample_59_control	RNA	3	control	547
sample_16_case	RNA	1	case	416
sample_16_case	RNA	2	case	751
sample_16_case	RNA	3	case	1187
sample_17_case	RNA	1	case	696
sample_17_case	RNA	2	case	230
sample_17_case	RNA	3	case	525
sample_18_case	RNA	1	case	381
sample_18_case	RNA	2	case	964
sample_18_case	RNA	3	case	729
sample_19_case	RNA	1	case	971
sample_19_case	RNA	2	case	707
sample_19_case	RNA	3	case	350
sample_20_case	RNA	1	case	488
sample_20_case	RNA	2	case	406
sample_20_case	RNA	3	case	293
sample_60_control	RNA	1	control	828
sample_60_control	RNA	2	control	998
sample_60_control	RNA	3	control	913
sample_21_case	RNA	1	case	963
sample_21_case	RNA	2	case	810
sample_21_case	RNA	3	case	1321
sample_61_control	RNA	1	control	480
sample_61_control	RNA	2	control	817
sample_61_control	RNA	3	control	947
sample_62_control	RNA	1	control	661
sample_62_control	RNA	2	control	675
sample_62_control	RNA	3	control	469
sample_22_case	RNA	1	case	1294
sample_22_case	RNA	2	case	217
sample_22_case	RNA	3	case	316
sample_23_case	RNA	1	case	608
sample_23_case	RNA	2	case	1220
sample_23_case	RNA	3	case	319
sample_63_control	RNA	1	control	247
sample_63_control	RNA	3	control	307
sample_64_control	RNA	1	control	574
sample_64_control	RNA	2	control	642
sample_64_control	RNA	3	control	313
sample_65_control	RNA	1	control	1056
sample_65_control	RNA	2	control	1204
sample_65_control	RNA	3	control	444
sample_66_control	RNA	1	control	626
sample_66_control	RNA	2	control	17
sample_66_control	RNA	3	control	390
sample_67_control	RNA	1	control	513
sample_67_control	RNA	2	control	419
sample_67_control	RNA	3	control	397
sample_24_case	RNA	1	case	312
sample_24_case	RNA	2	case	582
sample_24_case	RNA	3	case	739
sample_68_control	RNA	1	control	820
sample_68_control	RNA	2	control	442
sample_68_control	RNA	3	control	878
sample_25_case	RNA	1	case	907
sample_25_case	RNA	2	case	857
sample_25_case	RNA	3	case	637
sample_26_case	RNA	1	case	639
sample_26_case	RNA	2	case	362
sample_26_case	RNA	3	case	499
sample_69_control	RNA	1	control	606
sample_69_control	RNA	2	control	763
sample_69_control	RNA	3	control	912
sample_70_control	RNA	1	control	495
sample_70_control	RNA	2	control	420
sample_71_control	RNA	1	control	743
sample_71_control	RNA	2	control	532
sample_71_control	RNA	3	control	586
sample_27_case	RNA	1	case	689
sample_27_case	RNA	2	case	1001
sample_27_case	RNA	3	case	938
sample_28_case	RNA	1	case	579
sample_28_case	RNA	2	case	938
sample_28_case	RNA	3	case	1153
sample_72_control	RNA	1	control	97
sample_72_control	RNA	2	control	252
sample_72_control	RNA	3	control	500
sample_73_control	RNA	1	control	1064
sample_73_control	RNA	2	control	194
sample_73_control	RNA	3	control	585
sample_29_case	RNA	1	case	508
sample_29_case	RNA	2	case	1193
sample_74_control	RNA	1	control	1026
sample_74_control	RNA	2	control	1356
sample_74_control	RNA	3	control	420
sample_75_control	RNA	1	control	581
sample_75_control	RNA	2	control	775
sample_75_control	RNA	3	control	770
sample_30_case	RNA	1	case	209
sample_30_case	RNA	3	case	505
sample_76_control	RNA	1	control	1000
sample_76_control	RNA	2	control	2
sample_76_control	RNA	3	control	897
sample_31_case	RNA	1	case	795
sample_31_case	RNA	2	case	1268
sample_31_case	RNA	3	case	844
sample_77_control	RNA	1	control	759
sample_77_control	RNA	2	control	564
sample_32_case	RNA	1	case	960
sample_32_case	RNA	2	case	242
sample_32_case	RNA	3	case	727
sample_78_control	RNA	1	control	1416
sample_78_control	RNA	2	control	318
sample_78_control	RNA	3	control	640
sample_79_control	RNA	1	control	596
sample_79_control	RNA	2	control	355
sample_79_control	RNA	3	control	239
sample_80_control	RNA	1	control	930
sample_80_control	RNA	2	control	1186
sample_80_control	RNA	3	control	1001
sample_33_case	RNA	1	case	935
sample_33_case	RNA	2	case	1161
sample_33_case	RNA	3	case	666
sample_81_control	RNA	1	control	476
sample_81_control	RNA	2	control	933
sample_81_control	RNA	3	control	968
sample_82_control	RNA	1	control	519
sample_82_control	RNA	2	control	1314
sample_82_control	RNA	3	control	938
sample_34_case	RNA	1	case	682
sample_34_case	RNA	2	case	836
sample_34_case	RNA	3	case	1097
sample_83_control	RNA	1	control	1990
sample_83_control	RNA	2	control	585
sample_83_control	RNA	3	control	854
sample_84_control	RNA	1	control	749
sample_84_control	RNA	2	control	1474
sample_84_control	RNA	3	control	292
sample_35_case	RNA	1	case	1114
sample_35_case	RNA	3	case	549
sample_85_control	RNA	1	control	371
sample_85_control	RNA	3	control	990
sample_86_control	RNA	1	control	1026
sample_86_control	RNA	2	control	957
sample_86_control	RNA	3	control	728
sample_36_case	RNA	1	case	241
sample_36_case	RNA	2	case	550
sample_36_case	RNA	3	case	445
sample_87_control	RNA	1	control	405
sample_87_control	RNA	2	control	710
sample_87_control	RNA	3	control	703
sample_88_control	RNA	1	control	276
sample_88_control	RNA	2	control	264
sample_88_control	RNA	3	control	738
sample_89_control	RNA	1	control	436
sample_89_control	RNA	2	control	870
sample_89_control	RNA	3	control	1436
sample_90_control	RNA	1	control	640
sample_90_control	RNA	2	control	776
sample_90_control	RNA	3	control	567
sample_37_case	RNA	1	case	779
sample_37_case	RNA	2	case	921
sample_37_case	RNA	3	case	996
sample_38_case	RNA	1	case	277
sample_38_case	RNA	2	case	107
sample_91_control	RNA	1	control	374
sample_91_control	RNA	2	control	1239
sample_91_control	RNA	3	control	773
sample_39_case	RNA	1	case	276
sample_39_case	RNA	2	case	1200
sample_39_case	RNA	3	case	943
sample_92_control	RNA	1	control	1037
sample_92_control	RNA	2	control	799
sample_92_control	RNA	3	control	469
sample_93_control	RNA	1	control	1036
sample_93_control	RNA	2	control	193
sample_93_control	RNA	3	control	417
sample_94_control	RNA	1	control	791
sample_94_control	RNA	2	control	1053
sample_94_control	RNA	3	control	727
sample_95_control	RNA	1	control	493
sample_95_control	RNA	2	control	888
sample_95_control	RNA	3	control	833
sample_40_case	RNA	1	case	393
sample_40_case	RNA	2	case	547
sample_40_case	RNA	3	case	276
sample_41_case	RNA	1	case	895
sample_41_case	RNA	2	case	790
sample_41_case	RNA	3	case	911
sample_96_control	RNA	1	control	558
sample_96_control	RNA	2	control	645
sample_96_control	RNA	3	control	247
sample_42_case	RNA	1	case	456
sample_42_case	RNA	2	case	542
sample_42_case	RNA	3	case	351
sample_43_case	RNA	1	case	908
sample_43_case	RNA	2	case	406
sample_43_case	RNA	3	case	505
sample_97_control	RNA	1	control	624
sample_97_control	RNA	2	control	606
sample_97_control	RNA	3	control	325
sample_44_case	RNA	1	case	448
sample_44_case	RNA	2	case	827
sample_44_case	RNA	3	case	788
sample_45_case	RNA	1	case	993
sample_45_case	RNA	2	case	739
sample_45_case	RNA	3	case	1000
sample_46_case	RNA	1	case	192
sample_46_case	RNA	2	case	440
sample_46_case	RNA	3	case	446
sample_47_case	RNA	1	case	449
sample_47_case	RNA	2	case	752
sample_48_case	RNA	1	case	394
sample_48_case	RNA	2	case	1225
sample_48_case	RNA	3	case	523
sample_98_control	RNA	1	control	544
sample_98_control	RNA	3	control	192
sample_49_case	RNA	1	case	641
sample_49_case	RNA	2	case	708
sample_49_case	RNA	3	case	699

## Sheet: Supplementary Table 2
gene	peak	pearson	n_celltypes
FAM151B	chr5-80264188-80264659	0.996643	9
PID1	chr2-229310420-229310729	0.994598	7
C6orf223	chr6-43804014-43804452	0.993472	7
DMXL2	chr15-51003993-51004571	0.991698	12
SCUBE2	chr11-9017468-9018181	0.990269	6
ALDH1A2	chr15-59176743-59177727	0.989729	10
MITF	chr3-69738904-69740259	0.989327	10
MAFB	chr20-40680458-40680833	0.98838	12
PILRA	chr7-100373128-100373522	0.988134	13
MS4A14	chr11-60953794-60954030	0.987627	6
ZNF831	chr20-59007795-59008503	-0.987047	13
MSR1	chr8-16194785-16194999	0.986735	8
INHBA	chr7-41693302-41693576	0.986522	12
SLC11A1	chr2-218678996-218679920	0.986515	13
PAX5	chr9-37337452-37337936	0.986079	8
C6orf223	chr6-43798684-43799116	0.985827	7
SCIN	chr7-12583163-12583533	0.98577	11
RTN1	chr14-59869528-59871219	0.984075	7
HK3	chr5-176899233-176899468	0.98399	11
PRKAG2	chr7-151808915-151809138	0.983754	12
LILRA2	chr19-53829457-53830351	0.982553	13
CFD	chr19-1459393-1459770	0.982547	14
EPHB2	chr1-22831801-22832376	0.982161	7
RIN2	chr20-19913414-19913630	0.981866	12
TMEM51	chr1-15258861-15259258	0.981791	10
TLR4	chr9-117725288-117725890	0.981749	12
HCAR2	chr12-122702740-122703546	0.981706	12
CLEC7A	chr12-10027343-10028126	0.981661	12
TSPAN4	chr11-1770546-1770784	0.981547	12
CTSL	chr9-87712963-87713869	0.981106	13
HCAR3	chr12-122702740-122703546	0.980987	13
SCUBE2	chr11-9273088-9274291	0.98097	6
CXCL3	chr4-74108644-74109820	0.980795	14
KLRD1	chr12-10285775-10286318	0.98075	14
PID1	chr2-229282616-229283585	0.980546	10
FAM20C	chr7-115251-115821	0.980528	13
MFSD1	chr3-158810618-158811446	0.980433	13
HCK	chr20-32603037-32603305	0.980376	12
CXCL2	chr4-74108644-74109820	0.980293	13
TBC1D9	chr4-140789320-140791231	0.980083	12
TGFBI	chr5-135140631-135141730	0.980075	13
EREG	chr4-74108644-74109820	0.980025	14
TMEM51	chr1-15258141-15258555	0.980008	10
IL1A	chr2-112799050-112799745	0.979942	10
SCO2	chr22-50399672-50400449	0.979909	15
SLC24A4	chr14-92503711-92504183	0.979846	13
CXCL2	chr4-73725998-73726299	0.979763	10
DSE	chr6-116384973-116385695	0.9795	13
NLRP3	chr1-247445569-247446324	0.979439	13
PPARG	chr3-12356814-12357405	0.97909	9
HOMER3	chr19-18848863-18849122	0.978465	12
NLRP3	chr1-247358792-247359348	0.978335	13
IL1R2	chr2-101463331-101464556	0.97833	12
VENTX	chr10-133012552-133012963	0.978176	10
CYP2S1	chr19-41233607-41234143	0.978063	10
JDP2	chr14-76190893-76191786	0.978027	12
FAM49A	chr2-16653766-16654079	0.978023	13
NCR1	chr19-54905619-54906209	0.977798	13
LINC00964	chr8-124771731-124772519	0.977751	8
PHLDB2	chr3-111858961-111860713	0.977741	14
CXCL3	chr4-73725998-73726299	0.977717	10
MPEG1	chr11-59222501-59223000	0.977652	13
TGFBR3	chr1-91533680-91534007	0.977577	11
LCK	chr1-32339616-32339844	-0.977549	14
HCK	chr20-32062472-32063311	0.977514	14
JDP2	chr14-75184440-75184674	0.977436	12
OLR1	chr12-10027343-10028126	0.977408	13
TGFBI	chr5-135392180-135392573	0.977358	13
ALDH1A2	chr15-58139706-58140321	0.977237	11
LINC00964	chr8-124802851-124803157	0.977185	8
ETS2	chr21-39369758-39370840	0.977175	14
P2RY6	chr11-73274686-73274967	0.976842	7
SH3BP4	chr2-235614410-235614656	0.976787	11
ELOVL7	chr5-61306517-61307094	0.976684	8
PAPSS2	chr10-87657397-87657841	0.976635	13
EPHB2	chr1-22750126-22750656	0.976628	7
ACPP	chr3-131361018-131362414	0.976506	8
IL1A	chr2-113083113-113083701	0.976466	10
FCN1	chr9-134371858-134372160	0.976463	13
IL1A	chr2-112006052-112006415	0.976427	10
LINC01503	chr9-129347425-129347855	0.976424	12
KLRD1	chr12-10453109-10453472	0.976296	11
PHLDA1	chr12-75951702-75952238	0.976223	12
P2RX1	chr17-3639979-3640364	0.97609	14
IL1RN	chr2-113083113-113083701	0.975762	13
IFI30	chr19-18848863-18849122	0.975721	13
MS4A6A	chr11-60835289-60835754	0.975651	12
PRKAG2	chr7-151793568-151793854	0.975558	12
LCK	chr1-31482623-31483966	-0.97553	13
TLR2	chr4-153676985-153677353	0.975437	10
EPB41L3	chr18-5574607-5575257	0.975415	12
CD93	chr20-23152071-23152754	0.975414	14
LILRB3	chr19-53844898-53845124	0.97541	12
CYP27A1	chr2-217850324-217850589	0.975356	9
CLEC2D	chr12-9764500-9765447	0.975351	15
LINC00964	chr8-124866146-124866941	0.97528	8
SOX5	chr12-24378497-24379218	0.97506	8
CD14	chr5-140321654-140322185	0.975009	14
FAM151B	chr5-80127018-80127394	0.974919	9
PRKCH	chr14-61342498-61342814	0.974914	17
GABARAP	chr17-8069080-8069390	0.974777	14
TEX41	chr2-144701093-144702322	0.974274	6
RASAL2	chr1-178126671-178127131	0.974272	9
CATIP-AS1	chr2-217850324-217850589	0.974263	12
TCN2	chr22-29798987-29799695	0.974189	11
CLEC12A	chr12-9764500-9765447	-0.97415	12
HBEGF	chr5-140253866-140254517	0.974044	13
SLC8A1	chr2-40455398-40456023	0.974036	10
PPARG	chr3-12681286-12682892	0.97403	10
C5AR1	chr19-47315151-47315697	0.974024	14
IL1R2	chr2-101446505-101447293	0.973965	12
C5AR1	chr19-46529568-46530931	0.973811	14
KLRG1	chr12-9009909-9010480	0.973789	15
CD14	chr5-140602794-140603189	0.973706	13
ABR	chr17-2083487-2084036	0.973657	14
KLRC1	chr12-10453109-10453472	0.973549	12
APOBEC3A	chr22-38406527-38406972	0.973489	12
CLIC4	chr1-24733099-24733601	0.973453	14
TYMP	chr22-50399672-50400449	0.973445	14
ETS2	chr21-39014647-39015091	0.973307	12
SMAD6	chr15-66617365-66617911	0.973212	10
FAM20A	chr17-68602820-68603500	0.973113	13
FPR1	chr19-51788991-51789520	0.973085	11
LINC00964	chr8-124840148-124840799	0.972977	8
LINC00964	chr8-125429208-125430341	0.972924	8
CLEC12A	chr12-10184274-10184766	0.972889	12
OTUD1	chr10-23412013-23412576	0.972808	13
BCAT1	chr12-24902257-24903298	0.972775	15
FERMT3	chr11-63620927-63621489	0.972735	13
BEST1	chr11-62004418-62004836	0.972719	13
FCN1	chr9-134122576-134123359	0.972679	13
MLXIPL	chr7-73581859-73582304	0.972664	12
VENTX	chr10-133009042-133009802	0.972615	12
CD163	chr12-7966578-7966888	0.972602	10
NEBL	chr10-21173218-21174644	0.972343	6
NKG7	chr19-51386989-51387302	0.972229	13
PMP22	chr17-15262489-15262723	0.972179	12
TLR2	chr4-153655593-153656207	0.972141	12
ETV6	chr12-11809551-11810056	0.971948	13
CD68	chr17-8069080-8069390	0.97193	14
TMEM170B	chr6-11770429-11771297	0.971891	12
STAB1	chr3-53327897-53328299	0.971713	13
FAM102A	chr9-128026223-128026632	0.971682	15
CXCL2	chr4-74374349-74375330	0.971626	14
PID1	chr2-229313381-229314015	0.971552	11
MLXIPL	chr7-74133821-74134611	0.971542	12
TRPS1	chr8-115867255-115868067	0.971499	14
KLRD1	chr12-10279888-10280198	0.971448	12
NCR1	chr19-54739771-54740308	0.971407	12
KLRD1	chr12-10307687-10307923	0.971191	12
HCAR2	chr12-122681474-122682155	0.971101	12
LINC00964	chr8-125311443-125311673	0.971093	7
CDCP1	chr3-45123883-45124217	0.970946	8
RNF130	chr5-179759110-179759359	0.970851	14
C5AR1	chr19-47388752-47390184	0.970794	14
SCARF1	chr17-1110841-1111432	0.97068	12
MS4A4A	chr11-60285316-60285574	0.970644	7
COL19A1	chr6-70857468-70857715	0.970528	8
PLA2G7	chr6-46730788-46731236	0.970498	11
ARSI	chr5-151258167-151258627	0.970445	13
SIRPA	chr20-1820618-1820999	0.970331	12
FAM110B	chr8-58396290-58397621	0.970328	8
TRIB1	chr8-125341999-125342615	0.970306	15
ZNF385A	chr12-54382978-54383505	0.970277	14
KCNE3	chr11-74580864-74581634	0.970272	8
IL1A	chr2-112839198-112839986	0.970243	10
NCR1	chr19-54770388-54771304	0.970086	10
CD300E	chr17-75300997-75302083	0.969988	13
IL3RA	chrX-1334019-1334438	0.969946	14
C6orf223	chr6-43977221-43978804	0.969779	7
PTGES	chr9-129347425-129347855	0.969739	13
CDK14	chr7-90595724-90597005	0.969696	14
BEST1	chr11-62497173-62497706	0.969656	14
ST18	chr8-52460004-52460599	0.969639	8
IGF2BP3	chr7-22726900-22727514	0.969552	13
TM4SF19	chr3-196337990-196338741	0.969472	7
LILRA5	chr19-53823646-53824692	0.969273	13
MYOF	chr10-93436118-93436370	0.969184	11
TMEM176B	chr7-150489524-150490145	0.969129	10
EPB41L3	chr18-5462243-5462511	0.969095	12
SIRPA	chr20-1490964-1492499	0.969008	13
WDFY4	chr10-48683573-48685702	0.968978	14
C15orf48	chr15-45445065-45445867	0.96895	13
CXCL2	chr4-73704324-73705026	0.968908	13
CXCL1	chr4-74108644-74109820	0.968891	12
IFITM10	chr11-1777886-1778102	0.968873	12
TBC1D9	chr4-140742228-140743756	0.968681	12
IL6R	chr1-154423357-154423781	0.968636	13
TNFRSF21	chr6-47165968-47166222	0.968465	13
RASGRP1	chr15-39468361-39468687	-0.968401	13
ALDH2	chr12-111170234-111170923	0.968387	15
KLRD1	chr12-10303941-10304478	0.968345	12
RUNX1	chr21-35565241-35565454	0.968345	8
LINC00106	chrX-1336144-1337159	0.968304	13
PPARG	chr3-12351207-12351436	0.968302	7
HK3	chr5-176901684-176902078	0.968233	11
TCN2	chr22-30279132-30279720	0.968224	11
ALDH1A2	chr15-59169336-59169748	0.968156	10
PLA2G7	chr6-47343413-47343983	0.968146	11
PILRA	chr7-100915002-100915401	0.967917	12
NDST1	chr5-149735227-149735445	0.967756	12
PYGL	chr14-50955381-50956018	0.967756	12
FPR1	chr19-51668160-51668599	0.967749	11
TTYH3	chr7-2774846-2775167	0.967695	12
FPR1	chr19-51430956-51431389	0.967674	12
CD300LB	chr17-73969755-73970407	0.967561	13
NAMPT	chr7-106858777-106859322	0.967533	13
PRKAG2	chr7-151923108-151923885	0.967434	14
TNS1	chr2-217934194-217935265	0.967425	13
NCALD	chr8-102113954-102114636	0.967421	13
MEFV	chr16-3589209-3589902	0.967391	11
C5AR2	chr19-47388752-47390184	0.967354	12
KCNE3	chr11-74461895-74462327	0.967345	7
LILRA6	chr19-53829457-53830351	0.967294	12
FAM149A	chr4-186104328-186106108	0.967026	8
FLRT2	chr14-85531555-85532189	0.967007	10
CLEC4E	chr12-8540490-8541258	0.966998	13
LILRA6	chr19-54222398-54223425	0.966971	13
FGD4	chr12-31895914-31897092	-0.966923	13
NOD2	chr16-50102126-50102673	0.966859	12
PLA2G7	chr6-46734791-46735559	0.966784	11
SLC24A4	chr14-91521003-91521723	0.966725	13
SLC11A1	chr2-218820233-218820791	0.96672	12
MIR3945HG	chr4-184895196-184895578	0.966661	13
DAGLA	chr11-62497173-62497706	0.966661	11
HNMT	chr2-137968846-137969754	0.966641	12
DHX34	chr19-47324000-47324821	0.966629	13
ZMYND15	chr17-4736190-4736453	0.966617	11
LINC00346	chr13-110869589-110870531	0.966566	7
LCK	chr1-31605377-31606382	-0.966287	13
LILRB2	chr19-53823646-53824692	0.966148	13
EPHB2	chr1-21768047-21768700	0.966083	7
PLA2G7	chr6-47167992-47168559	0.966006	11
TTC7B	chr14-90087189-90087948	0.966006	13
HBEGF	chr5-140602794-140603189	0.965996	13
HK3	chr5-177545518-177546749	0.96599	11
LILRA5	chr19-54642707-54644391	0.965894	13
FPR1	chr19-51754057-51754424	0.965893	10
C6orf223	chr6-44058390-44059357	0.965889	7
TMEM176B	chr7-151793568-151793854	0.965828	11
C6orf223	chr6-44064294-44064889	0.965784	7
C20orf194	chr20-3712394-3712812	0.965776	12
CTSB	chr8-11887076-11887603	0.965741	14
C6orf223	chr6-44011935-44012474	0.965667	7
CD300LF	chr17-73969755-73970407	0.965666	13
CSF3R	chr1-36299824-36300358	0.965541	14
KLF4	chr9-107751602-107752108	0.965513	14
LIN7A	chr12-80939349-80939798	0.965461	6
HCK	chr20-32068552-32069315	0.965388	13
CD300LB	chr17-75096083-75096476	0.96537	13
DNAH17	chr17-78591809-78592889	0.965304	11
SIRPA	chr20-1944771-1945515	0.965302	12
MAFB	chr20-40561916-40562516	0.965232	13
HLA-DQA2	chr6-33029102-33030223	0.96523	14
C6orf223	chr6-44022065-44022789	0.965187	7
LINC00964	chr8-125696833-125697103	0.965185	8
CD300C	chr17-75096083-75096476	0.965084	13
TMEM51	chr1-15952704-15953052	0.964997	10
SMCO4	chr11-93537606-93538199	0.964977	12
LILRB4	chr19-54662760-54663045	0.964891	11
HCAR3	chr12-122681474-122682155	0.964887	13
VEGFA	chr6-44064294-44064889	0.964836	15
SOCS6	chr18-70420110-70420510	0.964819	11
GNB4	chr3-179429963-179430170	0.964801	13
LRRK2	chr12-40158275-40159120	0.964783	13
CLEC12A	chr12-9976682-9976955	0.964736	11
PTAFR	chr1-28139109-28139633	0.964682	13
CRLF2	chrX-1222276-1223417	0.964631	10
PPFIA1	chr11-70323720-70324259	0.964592	13
TMEM51	chr1-15260646-15261836	0.964384	10
PAX5	chr9-37378120-37378558	0.964331	10
SRGAP1	chr12-63918816-63919047	0.964219	9
CD86	chr3-122773695-122774909	0.964209	13
ODF3B	chr22-50399672-50400449	0.964171	14
PPARG	chr3-13189369-13190024	0.964118	10
TGFBI	chr5-135456020-135456768	0.964087	13
TOM1	chr22-35328491-35328728	0.964062	11
HLA-DRB5	chr6-33029102-33030223	0.96406	14
PIP5K1B	chr9-68704593-68705515	0.963958	11
LILRA1	chr19-53823646-53824692	0.963918	12
KLRD1	chr12-10602574-10603040	0.963891	12
LINC01010	chr6-134412879-134413726	0.96387	8
CRLF2	chrX-1316131-1316936	0.963753	10
ARHGEF10L	chr1-17365318-17365617	0.963718	11
SIGLEC9	chr19-51426996-51427519	0.96366	10
ANPEP	chr15-89823391-89823697	0.963636	12
CD86	chr3-122063917-122064599	0.963598	13
SDC4	chr20-45344246-45344537	0.963575	13
MAFB	chr20-40493462-40494547	0.963549	13
CD14	chr5-140595390-140596237	0.963502	13
IGF2BP3	chr7-23410042-23411026	0.963494	13
ZNF521	chr18-25351736-25352527	0.963459	12
INSIG1	chr7-155593514-155593863	0.963431	13
DSC2	chr18-31206105-31207292	0.96343	8
KCNMB1	chr5-170466617-170467514	0.963419	13
HLA-DMA	chr6-33029102-33030223	0.963342	14
SLC26A2	chr5-149134162-149134786	0.963318	13
TMEM52B	chr12-10167264-10167995	0.96326	9
CLIP1	chr12-122681474-122682155	0.963198	14
CACHD1	chr1-64550460-64550836	0.963151	8
MRAS	chr3-138114748-138115687	0.963109	11
SPTAN1	chr9-127833624-127833899	-0.963013	15
MMP19	chr12-55847615-55848225	0.962891	13
FOXO3	chr6-108622052-108623263	0.962792	15
LILRA5	chr19-54271044-54272486	0.96274	12
LINC00964	chr8-125385744-125386705	0.962722	8
RASGRP1	chr15-38050361-38051170	-0.962701	11
GPR84	chr12-54382978-54383505	0.96266	13
LILRB4	chr19-54271044-54272486	0.962637	11
ETS1	chr11-128302102-128302946	0.962579	17
CCL7	chr17-34220785-34221343	0.96253	12
AHR	chr7-17405865-17406079	0.962522	12
FARP2	chr2-242085448-242086712	0.962475	14
CXCL8	chr4-74108644-74109820	0.962396	14
NCF2	chr1-183603887-183605072	0.96237	13
VENTX	chr10-133292720-133294533	0.962272	12
PRKCH	chr14-61388099-61388915	0.962229	17
UBE2R2	chr9-33759444-33759946	0.962168	14
VASH1	chr14-76773490-76773810	0.962133	15
LILRA6	chr19-53823646-53824692	0.962069	12
CCNJL	chr5-160297827-160298264	0.962058	11
SGMS2	chr4-107824033-107825523	0.962054	14
ETS2	chr21-39079306-39079957	0.961955	13
PAPSS2	chr10-87739638-87740638	0.9618	13
KLF4	chr9-107932094-107932408	0.961793	9
IGF2BP3	chr7-23470438-23470799	0.961632	13
LINC01010	chr6-134640307-134641543	0.961568	8
KCNE1	chr21-34513173-34513376	0.961554	10
MERTK	chr2-112799050-112799745	0.961487	14
CAMSAP1	chr9-136067042-136067724	0.961453	12
PHACTR1	chr6-13271901-13272846	0.961448	16
TC2N	chr14-91363847-91364310	-0.961419	13
CXCL16	chr17-4130594-4131064	0.961337	13
BMP6	chr6-8079923-8080582	0.961319	10
CST3	chr20-23115818-23116527	0.961274	12
MAFB	chr20-40641180-40641528	0.961185	11
MIR3945HG	chr4-184859851-184860680	0.961152	13
ARHGEF10L	chr1-17640082-17640663	0.961091	11
LIMD1	chr3-45547710-45548369	0.961033	14
FCAR	chr19-55178880-55180349	-0.961033	13
LDLRAD3	chr11-35932285-35933214	0.960954	9
CCL7	chr17-34200997-34201557	0.960926	13
MLXIPL	chr7-73587256-73588203	0.960858	12
PFKFB4	chr3-48613831-48614488	0.960857	14
MYO1E	chr15-59371549-59373072	0.960819	14
MMP19	chr12-55845417-55845630	0.960742	12
NTSR1	chr20-62662375-62662591	0.960581	9
LILRA6	chr19-54100425-54100981	0.96043	12
PID1	chr2-229270760-229271500	0.960385	11
CAMK2A	chr5-150081663-150082228	0.960362	13
PLD2	chr17-4736190-4736453	0.960278	13
TMEM51	chr1-15152787-15153403	0.960245	10
RASGRP1	chr15-39413519-39413947	-0.960163	11
P2RY1	chr3-152865599-152866147	0.960157	13
ZNF385A	chr12-55043007-55043832	0.960124	12
CDK14	chr7-90600016-90600522	0.960099	13
TREM1	chr6-41157160-41157641	0.960082	14
SIRPB1	chr20-1562441-1562985	0.960082	12
NPM1	chr5-172129283-172129681	-0.960072	13
SIGLEC9	chr19-51822296-51822751	0.960057	10
IL1A	chr2-112811465-112812281	0.960004	10
LINC00877	chr3-72270026-72270494	0.959993	13
SPOCK2	chr10-71867937-71868568	-0.959934	14
GAA	chr17-80092298-80093218	0.959917	13
TTC7B	chr14-91521003-91521723	0.959896	13
HRH1	chr3-11159142-11159946	0.95987	8
BLNK	chr10-96764199-96764623	0.959842	10
ANPEP	chr15-90160225-90160514	0.95974	12
SHTN1	chr10-117004127-117005572	0.95968	12
DMXL2	chr15-51227899-51228727	0.959674	14
TMEM189	chr20-50252110-50253105	0.959673	13
RASAL2	chr1-178282913-178283765	0.959661	11
LARGE1	chr22-33325526-33325910	0.959659	9
TNFRSF13B	chr17-16973855-16974281	0.959462	9
C5AR1	chr19-47309438-47309981	0.959442	12
CD80	chr3-119555196-119555684	0.959353	11
CLEC2D	chr12-9669518-9669791	0.959284	15
KLRD1	chr12-10249733-10250366	0.959271	14
CFD	chr19-751649-751917	0.959249	14
FCAR	chr19-54222398-54223425	0.95924	13
SLC31A2	chr9-113151728-113152130	0.95921	14
TRIB1	chr8-124866146-124866941	0.959133	14
SLC24A4	chr14-92247111-92248076	0.959098	13
SIRPA	chr20-2299374-2299602	0.958997	10
CXCL16	chr17-4736190-4736453	0.95898	13
RUNX2	chr6-44598685-44598952	0.958964	11
LILRA4	chr19-54179677-54180516	0.95896	11
DTX4	chr11-59216427-59217221	0.958902	13
IGF2BP3	chr7-23473883-23474816	0.958878	13
HLA-DRB5	chr6-32529536-32530586	0.958844	14
C12orf74	chr12-92995302-92995945	0.958805	6
PLEKHG1	chr6-150636885-150637129	0.958785	10
TEX41	chr2-144523921-144524644	0.958767	6
LIN7A	chr12-80936555-80937917	0.958701	6
KLF4	chr9-107982797-107983573	0.95867	13
LILRA6	chr19-54952238-54952824	0.958663	12
CAMKK1	chr17-4844879-4845527	0.958644	13
MEFV	chr16-3258865-3259358	0.958526	11
CYP1B1	chr2-37829058-37829616	0.958469	14
RIN1	chr11-65767760-65768093	0.958466	11
HLA-DMB	chr6-33029102-33030223	0.958363	14
TMEM189	chr20-50379194-50379485	0.958268	13
KYNU	chr2-142880097-142880629	0.958243	13
ADAMTSL4	chr1-149931255-149931640	0.958183	13
S100A9	chr1-153390065-153390573	0.958132	12
TCF4	chr18-55069509-55069867	0.958083	11
S100A8	chr1-153390065-153390573	0.958064	12
BCAR3	chr1-93706059-93706326	0.958026	13
SLC26A2	chr5-149937693-149937935	0.958026	10
THBD	chr20-23156011-23156458	0.958018	13
TC2N	chr14-92704070-92704851	-0.957993	14
PLCL1	chr2-197847662-197848026	0.957969	11
INHBA	chr7-41709476-41710026	0.957892	11
STXBP2	chr19-7655358-7655947	0.957885	14
KLF4	chr9-107547834-107548770	0.957837	13
PTAFR	chr1-28174680-28174897	0.957783	12
IFI30	chr19-18173051-18174176	0.957704	14
PMP22	chr17-15651009-15652006	0.95769	12
FCN1	chr9-134924889-134925432	0.957673	13
METRNL	chr17-83199311-83200754	0.957582	16
DAPK1	chr9-87516037-87517037	0.957573	14
MITF	chr3-69764037-69764755	0.957543	10
LGALS2	chr22-36659575-36660332	0.957468	13
CYP1B1	chr2-38106398-38106830	0.957462	11
CSF2RA	chrX-1222276-1223417	0.957443	14
CD3E	chr11-118010716-118011240	-0.957378	16
RHBDL3	chr17-32274820-32275441	0.957359	8
TNFAIP2	chr14-103118941-103119300	0.957291	14
2024-03-01	chr4-163591514-163592017	0.957246	13
DOCK1	chr10-127196123-127196829	0.957193	8
ZNF385A	chr12-54423194-54423475	0.957153	14
SLC26A2	chr5-150053226-150053472	0.957136	13
HCAR3	chr12-122720138-122720804	0.957123	13
HLA-DRB1	chr6-32588886-32590373	0.957117	16
LINC00964	chr8-125341999-125342615	0.957113	8
TNFRSF21	chr6-47169737-47170854	0.956997	14
CYFIP1	chr15-22974547-22975160	0.956882	14
LILRA6	chr19-54859077-54859987	0.956869	12
EBF1	chr5-159034557-159034775	0.956863	10
CXCR5	chr11-118857448-118857794	0.956852	12
SMAD6	chr15-67024099-67024709	0.956849	10
AQP9	chr15-58139706-58140321	0.9568	13
ETS2	chr21-38930595-38931131	0.956791	14
LINC00877	chr3-72010125-72010365	0.956773	12
ITGB8	chr7-20466282-20467086	0.956765	12
SHTN1	chr10-116947769-116948649	0.956601	12
OXNAD1	chr3-15556168-15557185	-0.956579	14
ZC3H12C	chr11-110088102-110088458	0.956413	14
LINC01010	chr6-134420393-134420893	0.95638	8
HEXB	chr5-73859659-73860108	0.956378	13
SEC24A	chr5-135385943-135386393	0.956354	13
MS4A4A	chr11-60281581-60282573	0.956261	11
IFNGR2	chr21-33388278-33388497	0.9562	13
SCUBE2	chr11-8328514-8329154	0.956169	6
TCN2	chr22-30610272-30610635	0.956157	11
MAFB	chr20-40571454-40572337	0.956125	12
AGFG1	chr2-227366809-227367311	0.956117	12
KLRD1	chr12-10289016-10289231	0.956105	13
TNIK	chr3-171494218-171494953	0.956079	13
SEMA3C	chr7-80941325-80941720	0.956055	9
IFI30	chr19-17721832-17722059	0.95594	13
BCL11A	chr2-60819156-60820074	-0.955907	15
FAM49A	chr2-16656782-16657293	0.95589	14
ENG	chr9-128053512-128053953	0.955859	13
TREM1	chr6-41271709-41272570	0.955763	15
IFI30	chr19-17764861-17765482	0.955743	13
ADORA2B	chr17-15883457-15884186	0.955742	9
FAM151B	chr5-80122551-80122870	0.955716	9
DNAH17	chr17-78910798-78911273	0.955658	11
KLRC1	chr12-9604120-9604689	0.955636	14
CTSL	chr9-87711806-87712239	0.955629	13
INHBA	chr7-41824233-41824570	0.955563	11
TRPS1	chr8-116057862-116058583	0.955513	13
PNPLA6	chr19-7655358-7655947	0.955502	14
SEMA6B	chr19-4575277-4575798	0.955449	13
CAMKK1	chr17-4765880-4766639	0.955446	13
KLF4	chr9-107480335-107480795	0.955403	14
RAPH1	chr2-203497944-203498527	0.9554	14
PITPNC1	chr17-67440648-67441584	0.955395	15
TREM1	chr6-41280476-41280966	0.955382	12
HBEGF	chr5-140609136-140609455	0.955376	14
PIK3IP1	chr22-30609263-30609618	-0.955314	15
BLNK	chr10-96789135-96789925	0.955314	12
SLFN12L	chr17-35889157-35889473	0.955264	11
APLP2	chr11-130123696-130124484	0.955263	13
GPR84	chr12-55043007-55043832	0.955207	12
FFAR2	chr19-35405041-35405650	0.955176	12
CSF2RA	chrX-1316131-1316936	0.955171	13
KLRC1	chr12-10602574-10603040	0.955094	13
ZMYND15	chr17-4130594-4131064	0.955042	11
SLC24A4	chr14-93133493-93133719	0.955036	12
CTSL	chr9-87424879-87425585	0.955018	11
TCN2	chr22-30270770-30271152	0.955013	11
CDCP1	chr3-45064467-45065260	0.954976	10
CXCL16	chr17-4768268-4768686	0.954969	13
PPP1R3B	chr8-8625556-8626191	0.954935	14
FFAR2	chr19-35357786-35358499	0.954932	12
PHLDA1	chr12-75969316-75970155	0.95492	15
PLD2	chr17-4768268-4768686	0.954872	13
LINC00964	chr8-125174609-125175739	0.954846	8
PPARG	chr3-12393756-12394282	0.954838	8
MSR1	chr8-16192439-16193024	0.954813	12
BCL11B	chr14-99272011-99272370	0.954799	16
MRAS	chr3-138862528-138863693	0.954788	11
SCIN	chr7-12066016-12066963	0.954775	12
UBXN11	chr1-27119725-27120052	0.95473	13
CXCL2	chr4-74043761-74044322	0.954661	12
PITPNC1	chr17-67434926-67435446	0.954639	15
FCGRT	chr19-49515694-49516141	0.954635	14
ZFHX3	chr16-73153924-73154633	0.954488	12
ZAP70	chr2-98012470-98013023	-0.954478	13
LILRB2	chr19-54660333-54660538	0.95447	10
RHBDL3	chr17-32273163-32273392	0.954397	7
FAM110B	chr8-58217979-58218349	0.954342	7
VCAN	chr5-83368236-83369253	0.954315	13
FCRL3	chr1-157700379-157701073	0.954306	14
KLF4	chr9-107611965-107612386	0.954238	11
LRRK1	chr15-100917975-100919980	0.954229	12
CYP27A1	chr2-218731530-218731873	0.95422	9
CORO1C	chr12-108724213-108724626	0.954215	14
LILRB2	chr19-54642707-54644391	0.954153	13
AGAP3	chr7-151793568-151793854	0.954138	13
LDLRAD3	chr11-35308131-35308387	0.954126	8
MBOAT7	chr19-54795823-54796046	0.954117	10
DNAH17	chr17-79038652-79039043	0.954084	11
LINC00964	chr8-125649469-125649698	0.954075	8
PTAFR	chr1-28112607-28113164	0.954052	13
RILP	chr17-2083487-2084036	0.953811	14
TUBGCP2	chr10-133012552-133012963	0.953802	10
HLA-DRB5	chr6-32666197-32666842	0.953767	15
PDGFD	chr11-103958506-103958758	0.95361	12
TGFBR3	chr1-91884500-91884789	0.953593	12
SHB	chr9-38007815-38008607	0.953592	13
LAX1	chr1-203764376-203765819	0.953548	15
HRH1	chr3-11225000-11226043	0.953546	8
FOXO3	chr6-108689258-108689766	0.953538	15
PTGES	chr9-129343718-129344199	0.953499	13
PAPSS2	chr10-87659442-87660290	0.953468	13
HLA-DRA	chr6-33029102-33030223	0.953404	15
BANK1	chr4-101862555-101862847	0.953397	10
OSCAR	chr19-53844898-53845124	0.953396	11
EEPD1	chr7-36165012-36165492	0.953384	14
CLEC7A	chr12-10182290-10183023	0.953332	14
TNFRSF21	chr6-47160936-47161460	0.953268	13
HLA-DMB	chr6-32603920-32604848	0.953256	16
LAMB3	chr1-209657022-209657564	0.95324	13
C5AR1	chr19-46733283-46733564	0.953212	13
WDFY3	chr4-84572704-84574537	0.953184	11
HBEGF	chr5-140321654-140322185	0.953178	14
IL1B	chr2-113111593-113112279	0.953137	13
TMEM104	chr17-75737479-75738506	0.953108	14
HLA-DMB	chr6-33027630-33028761	0.953092	15
CD36	chr7-80680206-80680891	0.953071	12
ITK	chr5-157502005-157502550	-0.953006	13
ARSI	chr5-149680316-149681210	0.952998	12
NCF2	chr1-183583346-183583792	0.952996	13
PRKCH	chr14-61403326-61403682	0.952982	14
ST14	chr11-130165885-130166767	0.952973	13
LILRB3	chr19-53823646-53824692	0.952958	13
NLRP12	chr19-53849230-53849526	0.952869	12
LINC00877	chr3-71982382-71982977	0.952761	13
C5AR1	chr19-47324000-47324821	0.952732	12
MYOF	chr10-93554664-93555441	0.952642	11
MGLL	chr3-127733090-127733345	0.952615	13
TBC1D12	chr10-94402111-94403888	0.952585	14
KLRC1	chr12-10279888-10280198	0.952533	12
RHBDL3	chr17-31580354-31581223	0.952532	8
SERPINA1	chr14-94390580-94390817	0.952508	12
FCGR2A	chr1-161083031-161083831	0.952507	14
METRNL	chr17-83053839-83054406	0.952501	16
TMEM52B	chr12-10182290-10183023	0.95249	9
CDK17	chr12-96473350-96473693	0.952489	14
LINC00964	chr8-125694145-125694503	0.952465	8
MAPK6	chr15-51003993-51004571	0.952434	12
C1orf21	chr1-184386271-184388075	0.952411	15
MARCO	chr2-118973626-118974463	0.952403	10
TTC7B	chr14-90787944-90788339	0.952398	12
HCAR2	chr12-122720138-122720804	0.952372	12
RTN1	chr14-59849215-59850090	0.95233	7
S1PR5	chr19-10523074-10523606	0.952323	13
ITGB8	chr7-20596706-20596974	0.95231	12
NFAM1	chr22-41777832-41778357	0.952294	12
2024-03-01	chr4-163613297-163613682	0.952288	11
LAMP5	chr20-9514332-9514798	0.952283	11
IL1RL2	chr2-101516790-101518014	0.952233	13
HRH1	chr3-11077237-11077868	0.952232	8
IL1A	chr2-112784172-112784898	0.95217	10
IFITM10	chr11-1770546-1770784	0.952143	12
LTBR	chr12-6229801-6230291	0.952099	14
IL1R2	chr2-102063348-102064555	0.952077	12
PAX5	chr9-37100783-37101014	0.952068	10
CD86	chr3-121998002-121998464	0.95205	12
DPYSL3	chr5-147509182-147510187	0.952049	12
DUSP3	chr17-44333502-44333992	0.952044	12
TNFRSF25	chr1-6459849-6460790	0.952013	16
CYBB	chrX-37785514-37785933	0.951999	12
GPR84	chr12-54297883-54298159	0.951924	13
C6orf223	chr6-44000268-44000634	0.951905	7
C5AR1	chr19-46984617-46984835	0.951902	13
ADM	chr11-9900272-9900516	0.951837	10
LILRB3	chr19-54008167-54008606	0.951788	12
SIRPA	chr20-1889055-1889452	0.951763	12
LINC00964	chr8-124814731-124815830	0.951697	8
BANK1	chr4-101823977-101824399	0.951661	10
PDLIM5	chr4-94484966-94485979	0.951629	13
MITF	chr3-69321537-69321862	0.951623	10
TNS3	chr7-47497270-47497694	0.951589	12
MX2	chr21-42080248-42081396	0.951579	13
KIR2DL4	chr19-54804189-54804617	0.951561	10
VEGFA	chr6-44010470-44011084	0.951448	14
CD14	chr5-140609136-140609455	0.951441	13
FLVCR2	chr14-75301553-75302088	0.951393	13
HIPK3	chr11-33195167-33195733	0.951363	12
CD3G	chr11-118010716-118011240	-0.951362	16
ABHD6	chr3-57951203-57951767	0.95132	13
HBEGF	chr5-140595390-140596237	0.951296	14
ZNF697	chr1-119646847-119648578	0.951282	12
IL1RN	chr2-112839198-112839986	0.951232	13
TNS3	chr7-47600570-47601988	0.951191	13
SEMA3C	chr7-80918372-80919418	0.951177	11
C12orf74	chr12-92702677-92703293	0.951151	6
LILRB3	chr19-54952238-54952824	0.951137	13
HLA-DQA2	chr6-32588886-32590373	0.951097	15
PPFIA1	chr11-70326354-70326815	0.951093	10
EREG	chr4-74374349-74375330	0.951086	15
DHX34	chr19-47388752-47390184	0.951067	14
IL1B	chr2-113218306-113218773	0.95105	13
SDS	chr12-113415819-113416672	0.951031	12
NDST1	chr5-150763440-150763667	0.950938	12
HLA-DMB	chr6-32588886-32590373	0.950922	16
EPB41L3	chr18-5542552-5544205	0.950884	13
LINC01010	chr6-134422736-134423210	0.950829	8
HLA-DQA1	chr6-33029102-33030223	0.950778	14
STAB1	chr3-52174780-52175447	0.950707	14
FHAD1	chr1-15345534-15346216	0.950698	10
HLA-DRA	chr6-33027630-33028761	0.950686	15
SDS	chr12-113322285-113322698	0.950662	12
MSR1	chr8-16631920-16632611	0.95066	12
LDLRAD3	chr11-36148997-36150269	0.950648	9
TBC1D9	chr4-140728036-140728277	0.950574	11
MCTP1	chr5-95261436-95262077	0.950547	14
BLNK	chr10-96235810-96236480	0.950538	12
ALDH1A2	chr15-59305470-59305686	0.9505	11
SLC15A3	chr11-60953794-60954030	0.950484	13
CCL5	chr17-36066307-36067037	0.950476	14
BMF	chr15-40846794-40847669	0.950463	14
RILPL2	chr12-122743924-122744497	0.950367	13
CLIC4	chr1-24727244-24727859	0.950365	14
CD9	chr12-6192692-6192916	0.95033	13
SIGLEC9	chr19-51136881-51137456	0.950316	11
IGSF6	chr16-20910394-20911665	0.950314	15
TMEM176B	chr7-151796292-151796797	0.950308	12
MIR3945HG	chr4-184855512-184855790	0.950307	13
DGAT2	chr11-75771587-75771912	0.950227	10
CD74	chr5-151257677-151257921	0.950116	12
FGD4	chr12-32485477-32486089	0.950107	13
LILRA1	chr19-54642707-54644391	0.950099	12
PLB1	chr2-28445924-28446220	0.950072	12
PLXNC1	chr12-94172875-94173285	0.950054	14
RHOU	chr1-229068250-229068791	0.950039	13
SLC24A4	chr14-93009499-93009736	0.950025	13
CD300LB	chr17-74690380-74690804	0.949968	13
IL1A	chr2-113111593-113112279	0.949907	10
LILRA5	chr19-54207751-54208545	0.94986	13
ZMYND15	chr17-4768268-4768686	0.949829	11
ZNF469	chr16-88245052-88245508	0.949828	11
FLT3	chr13-28099856-28100978	0.94979	10
ACSL1	chr4-184855512-184855790	0.949693	14
BAIAP2	chr17-81049774-81050520	0.949653	13
LINC00877	chr3-72031305-72031938	0.949645	13
EBF1	chr5-158953806-158954327	0.94959	11
MAFB	chr20-40339445-40340460	0.94957	13
CD6	chr11-60185293-60185552	-0.949541	13
LILRB1	chr19-54630070-54631033	0.949529	13
CRLF2	chrX-1341455-1342172	0.949525	10
ABR	chr17-1752366-1753023	0.949497	15
PRR16	chr5-120405298-120405572	0.949441	6
MAFB	chr20-40326652-40327149	0.9494	12
ANKRD28	chr3-15438936-15439264	0.949345	13
PDLIM7	chr5-176901684-176902078	0.949275	14
EPHB2	chr1-23585441-23586000	0.949253	6
CYP27A1	chr2-218678996-218679920	0.949155	9
BASP1	chr5-17255204-17256052	0.949111	13
CDCP1	chr3-45055057-45055281	0.949106	8
BEST1	chr11-61954923-61955986	0.949097	14
BCL11A	chr2-60351866-60352163	0.949093	13
DAPK1	chr9-87613778-87614715	0.949053	14
LPCAT1	chr5-1469891-1470185	0.949028	15
ZNF503	chr10-75401315-75402528	0.949023	14
CPM	chr12-68787101-68787772	0.949022	13
SLC43A2	chr17-1586977-1587455	0.949021	14
NCOR2	chr12-124380111-124380483	0.949006	16
FAM20C	chr7-118948-119779	0.948938	13
TMEM170B	chr6-11206679-11207539	0.948934	14
C5AR2	chr19-46984617-46984835	0.948929	12
ZFHX3	chr16-73064153-73064400	0.948904	15
CSTA	chr3-122060042-122060542	0.948895	12
MTHFR	chr1-12142848-12144061	0.948884	16
SCUBE2	chr11-9363529-9364788	0.948831	6
ZMIZ1	chr10-79274149-79274685	0.948814	13
IL1A	chr2-113218306-113218773	0.948786	10
CCL5	chr17-35889157-35889473	0.948762	12
BLOC1S6	chr15-45445065-45445867	0.948761	13
IL7R	chr5-35671334-35671854	0.94871	14
USP32	chr17-59790678-59791207	0.94866	12
CYB5D1	chr17-7093936-7094690	0.948622	13
C15orf48	chr15-45641342-45641751	0.948594	12
PLAUR	chr19-43674262-43674989	0.948549	14
CD300C	chr17-74545702-74546186	0.948522	13
C5AR2	chr19-46529568-46530931	0.948504	12
BEST1	chr11-61971688-61972272	0.94841	14
DCLK2	chr4-150039473-150040137	0.948374	8
LMO2	chr11-33930148-33930968	0.948364	14
ANKRD33B	chr5-10600759-10601769	0.948355	14
TBC1D9	chr4-140755666-140757204	0.948329	13
KMO	chr1-241542126-241542813	0.948286	11
NCR1	chr19-54804189-54804617	0.948278	11
ITPRIPL2	chr16-19118875-19119334	0.948237	13
ITSN1	chr21-33010973-33011890	0.948231	12
NID1	chr1-235908609-235909160	0.94823	11
CPM	chr12-69006842-69007729	0.948227	12
SLC16A10	chr6-111113242-111114729	0.94821	13
KLF4	chr9-107674632-107676333	0.948106	14
LILRB2	chr19-54019072-54019334	0.947972	11
THBD	chr20-23115818-23116527	0.947966	12
AP1S3	chr2-223835950-223836366	0.947915	15
ABCC3	chr17-50634287-50634876	0.947909	13
TNS1	chr2-218745173-218745607	0.947894	13
NECTIN2	chr19-44741630-44742100	0.947893	14
PRPF4B	chr6-3592277-3592783	-0.94787	13
C5AR2	chr19-47324000-47324821	0.947863	11
HLA-DRB5	chr6-32588886-32590373	0.947853	15
MARCO	chr2-119283844-119284390	0.947836	10
CIITA	chr16-10886700-10887127	0.947827	14
MAP1S	chr19-17107648-17108403	0.947812	15
IL1R2	chr2-101521471-101521737	0.947803	11
TTC7B	chr14-90732185-90732474	0.947742	12
TMEM189	chr20-50283656-50284296	0.947741	14
CAMKK1	chr17-3639979-3640364	0.947698	13
CXCL2	chr4-73740240-73741525	0.947625	13
G0S2	chr1-209657022-209657564	0.947607	14
PSAP	chr10-71364512-71364987	0.947562	14
CYP2S1	chr19-41196006-41196392	0.947518	10
BCL11B	chr14-98931772-98932228	0.947488	15
MBOAT7	chr19-54100425-54100981	0.947474	13
ARHGEF10L	chr1-17618130-17618588	0.94739	11
ANPEP	chr15-90761705-90762466	0.94735	12
FCAR	chr19-54952238-54952824	0.94731	13
C15orf39	chr15-74511661-74512573	0.947278	14
LINC00861	chr8-125941413-125942617	0.947275	15
LILRB3	chr19-54019072-54019334	0.947241	11
FBXO21	chr12-117060300-117060634	-0.947223	14
PID1	chr2-229408271-229409278	0.947216	11
SKAP1	chr17-47647672-47647876	-0.947204	13
HLA-DMB	chr6-33018821-33019301	0.947196	15
JARID2	chr6-14820799-14821088	0.947138	13
PITPNC1	chr17-67449955-67450420	0.947135	11
OLR1	chr12-10182290-10183023	0.947104	14
LINC01010	chr6-134109475-134109827	0.947101	8
LINC01503	chr9-129343718-129344199	0.947048	12
RIN1	chr11-66012728-66013272	0.947028	13
SDS	chr12-113418191-113418444	0.946949	10
CIITA	chr16-11325607-11325943	0.946892	14
TNS1	chr2-217928211-217928951	0.946881	13
LINC00964	chr8-125440250-125440456	0.946876	8
EREG	chr4-73721960-73722212	0.946829	9
PPIF	chr10-79274149-79274685	0.946819	14
TRMT6	chr20-5657383-5657776	0.94679	11
EPHB2	chr1-22735153-22735582	0.946774	7
RIN2	chr20-20254868-20255481	0.946773	13
ZMYND15	chr17-4759755-4760211	0.946769	10
NPC2	chr14-75184440-75184674	0.946757	12
MTHFR	chr1-12184067-12184582	0.946728	15
SYN1	chrX-47579485-47579843	0.946685	13
TMEM176A	chr7-151796292-151796797	0.946674	12
NCR1	chr19-54755779-54756572	0.946672	11
CCL20	chr2-227817843-227819156	0.946659	14
SLFN12L	chr17-35890813-35891129	0.946657	14
PTAFR	chr1-28875001-28875449	0.946655	12
AFF3	chr2-99637286-99637590	0.946589	11
CD8B	chr2-86825550-86826634	0.946542	16
MBOAT7	chr19-54019072-54019334	0.946492	11
OXNAD1	chr3-16285871-16286953	0.946456	14
GATA3	chr10-8061343-8061945	0.946436	15
TTYH3	chr7-1916103-1916325	0.94641	13
CPVL	chr7-29139845-29140071	0.946379	13
MYBL1	chr8-66589310-66589685	0.946358	13
FBP1	chr9-94654004-94654827	0.946344	13
THBD	chr20-23145273-23145653	0.94628	13
DOCK1	chr10-126961395-126961603	0.946265	8
UBXN11	chr1-26274599-26275124	0.946263	13
LILRA2	chr19-54952238-54952824	0.946235	13
NID1	chr1-236022902-236023232	0.946192	11
ABR	chr17-1577068-1577921	0.946189	15
BEST1	chr11-62816401-62816867	0.94618	13
CSF2RA	chrX-1274651-1275132	0.946176	13
DOCK1	chr10-126905171-126905792	0.946175	7
DHRS9	chr2-169036733-169037402	0.94614	12
OAF	chr11-119618215-119618498	0.946103	13
CTTNBP2NL	chr1-112393781-112394457	0.946081	10
LILRB3	chr19-54642707-54644391	0.94606	13
SLC37A2	chr11-125070564-125071182	0.945993	14
LILRB2	chr19-54207751-54208545	0.945988	14
ST3GAL6	chr3-98762855-98763852	0.945961	14
LILRB1	chr19-54572206-54573094	0.945961	13
CIITA	chr16-10868373-10868901	0.945938	14
APOBEC3A	chr22-39282427-39282673	0.945911	13
TBC1D2	chr9-97876434-97877194	0.945846	13
SIRPA	chr20-2210839-2211456	0.945844	13
ANPEP	chr15-89820814-89821574	0.945821	14
RETN	chr19-8423171-8424225	0.945818	13
AQP9	chr15-58526128-58526916	0.945813	12
NCALD	chr8-102097077-102098129	0.945813	15
LIPN	chr10-89122440-89123784	0.945792	10
KLRK1	chr12-9906627-9907260	0.94578	15
C6orf223	chr6-44641897-44643261	0.945702	7
CHIC1	chrX-74450850-74451708	-0.945647	13
SCARF1	chr17-1039450-1040248	0.945609	12
MSR1	chr8-16196703-16197272	0.945558	11
BCL11A	chr2-60413649-60414106	0.945553	15
HRH2	chr5-175689216-175689893	0.945517	12
IL1B	chr2-112839198-112839986	0.945517	14
TGFBI	chr5-136011894-136012359	0.945471	13
FGD6	chr12-95132894-95133172	0.945428	12
THBS1	chr15-39396863-39397445	0.945426	12
SLC16A3	chr17-82283042-82283726	0.945421	15
HLA-DMA	chr6-33027630-33028761	0.94539	15
TNFAIP2	chr14-103361753-103362226	0.945386	13
PAPSS2	chr10-87670594-87671065	0.94538	13
AQP9	chr15-58329867-58330136	0.945375	13
JDP2	chr14-75614197-75614453	0.945294	11
DNAH17	chr17-78532946-78533166	0.945277	10
CATIP	chr2-217850324-217850589	0.945239	11
CD68	chr17-7093936-7094690	0.945226	13
CXCL16	chr17-4725581-4726175	0.945198	13
CSF2RA	chrX-1341455-1342172	0.945182	14
PPARG	chr3-12353797-12354132	0.945138	8
IL1RN	chr2-113111593-113112279	0.945128	14
LRG1	chr19-4559522-4559880	0.94511	12
GPX3	chr5-150065987-150066247	0.945075	12
C6orf223	chr6-44237138-44238430	0.94504	7
MEF2C	chr5-88888915-88890023	0.945034	16
BHLHE40	chr3-4977018-4979263	0.944983	16
BCAS4	chr20-50283656-50284296	-0.944929	14
OLR1	chr12-10167264-10167995	0.944897	15
SGCD	chr5-155727965-155728456	0.944865	6
SULF2	chr20-47748337-47749176	0.944851	13
MINK1	chr17-4768268-4768686	0.944793	13
HLA-DRA	chr6-32472390-32474225	0.944792	16
SPRED1	chr15-38068803-38069954	0.944789	12
C5AR2	chr19-47315151-47315697	0.944785	12
RETN	chr19-8640063-8640704	0.944764	13
MS4A7	chr11-60953794-60954030	0.944763	13
CD300LF	chr17-75300997-75302083	0.944739	13
MATK	chr19-3789026-3789621	0.944726	15
SLC7A11	chr4-138405317-138406565	0.944667	13
TRAPPC5	chr19-7655358-7655947	0.944657	14
DHX34	chr19-46984617-46984835	0.944618	14
EREG	chr4-73844375-73844717	0.94458	11
IL1R1	chr2-101516790-101518014	0.944554	14
C1orf21	chr1-183967863-183968270	0.944513	12
HLA-DQA1	chr6-32437075-32437761	0.944486	15
KLF4	chr9-107755182-107755614	0.944484	11
TC2N	chr14-92659787-92660044	-0.944477	14
KLRK1	chr12-10497468-10498035	0.944446	15
SDC4	chr20-46205846-46206341	0.94435	14
MCTP1	chr5-94433312-94433959	0.944338	14
RGL1	chr1-183807518-183808065	0.94433	12
PLXDC2	chr10-19826718-19826979	0.944306	13
TSPAN4	chr11-1781181-1781426	0.9443	13
SDS	chr12-113040578-113041246	0.944298	12
PLA2G7	chr6-46772158-46773090	0.944288	11
LIPN	chr10-89333741-89334369	-0.944252	10
DPYSL3	chr5-147415610-147415894	0.944252	8
LILRA6	chr19-54642707-54644391	0.944222	12
JDP2	chr14-75268897-75269115	0.944126	14
DOCK5	chr8-25243369-25244120	0.944082	15
ARHGAP24	chr4-85448987-85449397	0.944068	10
TM4SF19	chr3-196339796-196340055	0.944058	7
ENG	chr9-127838339-127838995	0.944051	15
MARCO	chr2-118936077-118936791	0.94404	10
CD24	chr6-106973384-106975727	0.944037	13
CD36	chr7-80642935-80643848	0.943938	13
CXCL3	chr4-73844375-73844717	0.943907	11
TMEM189	chr20-50259730-50261043	0.943902	14
NOD2	chr16-50657305-50657545	0.9439	14
CYP27A1	chr2-217899454-217899770	0.943896	9
CXCL2	chr4-74659395-74660149	0.943878	13
STAT5B	chr17-42266514-42267419	0.943836	16
SIRPA	chr20-2314387-2315457	0.943833	13
HLA-DMA	chr6-32472390-32474225	0.943802	15
ETS2	chr21-38289602-38290118	0.943786	13
EMILIN2	chr18-2898025-2898623	0.94376	14
KLRF1	chr12-10197883-10198134	0.943693	14
RIN2	chr20-19759633-19760159	0.943676	13
MAP1S	chr19-18392441-18392735	0.943616	14
SH3RF1	chr4-169270121-169271627	0.943602	14
C5AR2	chr19-46733283-46733564	0.943573	12
THBD	chr20-23152071-23152754	0.943524	13
NDST1	chr5-151063118-151063466	0.943518	12
AHCTF1	chr1-247358792-247359348	0.943475	13
OAF	chr11-120208675-120209079	0.94346	13
CD1D	chr1-158283799-158284367	0.94345	12
PTX3	chr3-156812585-156812819	0.943434	12
LYN	chr8-55885398-55886072	0.943428	16
PELI2	chr14-56092437-56093158	0.943424	14
ZNF608	chr5-124599423-124599870	0.943419	11
LILRB2	chr19-53844898-53845124	0.943321	12
LRRC25	chr19-17481037-17481393	0.943319	14
MGLL	chr3-127734704-127734958	0.943304	13
OSCAR	chr19-54019072-54019334	0.943286	10
FLRT2	chr14-85599671-85600312	0.943251	9
CDK14	chr7-90595051-90595255	0.943175	14
CLEC4D	chr12-8057428-8058226	0.943172	7
G0S2	chr1-209651084-209651524	0.94316	14
LYZ	chr12-68785266-68785780	0.943068	13
TMEM170B	chr6-12265277-12266869	0.943041	13
GK	chrX-30613235-30614050	0.943021	12
RAB20	chr13-110528364-110528652	0.943006	12
TNS1	chr2-218820233-218820791	0.942984	11
KLRC1	chr12-10249733-10250366	0.942979	14
ITGAX	chr16-31350254-31350506	0.94295	16
CCR1	chr3-45646958-45647641	0.942949	12
MIR3945HG	chr4-184392792-184393218	0.94293	13
CD300C	chr17-74690380-74690804	0.942907	12
TNS3	chr7-47669291-47669982	0.942907	13
GATA3	chr10-8360318-8360738	0.942888	13
FTL	chr19-48780474-48781305	0.942824	15
ITSN1	chr21-34200302-34200643	0.942813	13
HLA-DQB2	chr6-33029102-33030223	0.942806	9
SPOCK2	chr10-71871140-71872015	-0.942781	16
HCAR3	chr12-122400410-122400870	0.942739	13
FMNL2	chr2-152499954-152500204	0.942716	10
DMXL2	chr15-51629141-51629981	0.9427	14
PDGFD	chr11-104152912-104153318	0.942682	14
IL1B	chr2-112006052-112006415	0.942669	12
SMOX	chr20-3712394-3712812	0.942617	13
SCARF1	chr17-2156760-2158260	0.942548	12
TNFAIP6	chr2-151357002-151357731	0.942517	12
TMEM150B	chr19-54642707-54644391	0.942509	6
CXCL2	chr4-74056236-74057365	0.942502	12
GAB2	chr11-78424219-78424549	0.942494	14
PLXDC2	chr10-19815459-19818038	0.942461	16
ZC3H12C	chr11-110068973-110069763	0.942409	14
IL3RA	chrX-1320174-1320499	0.942403	13
C5AR2	chr19-47376551-47376786	0.942394	11
PNPLA6	chr19-7507701-7508191	0.942388	15
KLRC1	chr12-9827190-9827684	0.942375	12
NCALD	chr8-102107692-102108624	0.942371	15
PAPSS2	chr10-87668729-87668934	0.942353	12
HLA-DQB1	chr6-32774488-32774696	0.942339	14
PLA2G7	chr6-47160936-47161460	0.942339	10
GGA1	chr22-37610771-37611100	0.942327	14
OSCAR	chr19-54859077-54859987	0.942301	12
CYP27A1	chr2-218820233-218820791	0.942295	9
IL7	chr8-78803907-78805637	0.94229	12
CDCP1	chr3-46141924-46142125	0.942285	9
COL4A2	chr13-110463838-110464819	0.942271	7
NTSR1	chr20-62727559-62728716	0.942261	9
SDC2	chr8-96907041-96907349	0.942241	12
CXCL2	chr4-73721960-73722212	0.942232	9
ZMIZ1	chr10-79295521-79295861	0.942224	14
STARD8	chrX-68666421-68666940	0.94221	12
IL13RA1	chrX-119015112-119016117	0.942183	13
MITF	chr3-69541759-69542840	0.942176	9
DOCK1	chr10-127070523-127070921	0.942166	6
IL12RB2	chr1-67306966-67308522	0.942151	15
TMEM255B	chr13-113758557-113759684	0.942147	13
ZNF608	chr5-124825308-124825860	0.942146	10
ACPP	chr3-131504389-131504727	0.942135	8
PPARG	chr3-12303167-12304323	0.942132	9
CD9	chr12-6643475-6644508	0.94211	16
HCAR2	chr12-123444093-123444585	0.942052	12
B3GAT1	chr11-134348853-134350066	0.942044	10
HEATR1	chr1-235908609-235909160	-0.941993	13
CXCL2	chr4-73844375-73844717	0.941982	11
SYTL3	chr6-157768290-157768671	-0.941965	13
PILRA	chr7-100372207-100372521	0.941946	13
PTGES	chr9-129762178-129763036	0.941904	13
CD96	chr3-111615734-111616979	0.941864	16
CSF2RA	chrX-1336144-1337159	0.941766	13
LRRK2	chr12-40226168-40226939	0.941732	13
TNFAIP6	chr2-152030844-152031645	0.941729	12
CALCRL	chr2-187482807-187483066	0.941707	12
P2RX1	chr17-4765880-4766639	0.941705	14
ATG7	chr3-12193246-12194056	0.9417	13
MMP19	chr12-55847088-55847382	0.941698	13
ZFAND5	chr9-72925288-72925831	0.941698	10
LINC01010	chr6-135066176-135067223	0.941658	8
SNAI1	chr20-50029765-50030195	0.941655	13
EBF1	chr5-158995629-158995915	0.941642	12
PTGS2	chr1-186623427-186623841	0.941595	14
CIITA	chr16-10752919-10753476	0.941576	13
HCAR3	chr12-123444093-123444585	0.941501	13
OXNAD1	chr3-16309641-16309871	0.941482	14
DNAJB5	chr9-34992487-34992694	0.941453	15
CD300C	chr17-74520771-74521138	0.941451	11
B3GNT5	chr3-183243952-183245421	0.941435	15
CXCL1	chr4-73704324-73705026	0.941426	12
PRKCD	chr3-53143049-53143362	0.941418	12
MBOAT7	chr19-54642707-54644391	0.941337	13
RHOU	chr1-229193510-229193745	0.941334	11
NCALD	chr8-102106398-102107004	0.941313	15
CREB5	chr7-27339336-27339903	0.94128	14
KLRC3	chr12-10285775-10286318	0.941258	14
SIRPA	chr20-1569364-1569894	0.941159	13
CD93	chr20-23224900-23225757	0.941128	13
BLK	chr8-11508886-11509128	0.941126	12
CD300LB	chr17-74568722-74570002	0.941098	13
SYNGR2	chr17-77212154-77212718	0.941088	13
PPM1F	chr22-22085717-22087011	0.941045	13
SCIN	chr7-12584862-12585548	0.941028	12
PPCDC	chr15-75062006-75062354	0.941018	12
RIN2	chr20-19736907-19737449	0.940986	13
LRP1	chr12-57898396-57899629	-0.940908	14
PLD2	chr17-4759755-4760211	0.940885	12
BNC2	chr9-16870006-16872091	0.94088	10
LINC01010	chr6-134593563-134594261	0.940831	8
ADAM17	chr2-8598058-8598573	0.940826	14
SNHG1	chr11-62816401-62816867	-0.940804	15
SYCP2L	chr6-10886679-10887348	0.940761	11
THBD	chr20-23655546-23656328	0.940684	13
ALDH1A2	chr15-58065008-58066626	0.940684	11
TRNP1	chr1-26274599-26275124	0.940644	9
IL18	chr11-112159148-112160009	0.940642	13
LBH	chr2-30421142-30422872	0.940608	15
CHST15	chr10-124523309-124523754	0.940604	13
HK3	chr5-177415979-177416688	0.940589	11
SERPINB10	chr18-63887295-63887739	0.940572	6
KLRC1	chr12-10289016-10289231	0.940526	13
RASAL2	chr1-178119377-178119993	0.940471	11
DNAH17	chr17-78226795-78227373	0.940448	11
BMP6	chr6-6885554-6886308	0.940444	10
AP001042.1	chr21-39014647-39015091	0.940406	6
CCR1	chr3-45932030-45932471	0.940401	10
CXCL3	chr4-73721960-73722212	0.940374	9
DAPK1	chr9-87580129-87580409	0.940356	12
HLA-DQA2	chr6-33027630-33028761	0.94029	15
KLRB1	chr12-9604120-9604689	0.940222	14
GLUD1	chr10-86999770-87000730	0.940209	14
CD86	chr3-122074566-122075172	0.940174	13
AC012368.1	chr2-64137573-64137988	0.940165	14
CD96	chr3-111541794-111542379	0.940147	16
PHLDB3	chr19-43470250-43470522	0.94014	14
SRC	chr20-38275705-38276397	0.940089	13
TRNP1	chr1-27116672-27117028	0.940065	8
ST18	chr8-52482087-52482406	0.940056	7
MIR3945HG	chr4-184849201-184849523	0.940027	13
CST3	chr20-23087061-23087423	0.939991	13
LILRB2	chr19-54271044-54272486	0.939974	13
RASSF2	chr20-5647954-5648177	0.939969	12
ATG7	chr3-12169683-12170584	0.939948	12
C5AR1	chr19-47363378-47364448	0.939915	12
LYZ	chr12-69059454-69059824	0.939906	12
TNS1	chr2-217850324-217850589	0.939881	12
MXD1	chr2-69997016-69997804	0.939877	14
RETN	chr19-6720497-6720877	0.939848	13
MARCO	chr2-117979979-117981352	0.939804	10
BCAR3	chr1-94720015-94720772	0.9398	13
ARSI	chr5-150081663-150082228	0.939762	13
TGFBI	chr5-135385943-135386393	0.939759	12
FPR2	chr19-51735767-51736467	0.939689	9
MERTK	chr2-112006052-112006415	0.939668	12
GNB4	chr3-179431689-179432404	0.939663	15
TNS3	chr7-47574311-47574949	0.93965	13
AP5B1	chr11-65150377-65151479	0.939645	13
LILRB3	chr19-54222398-54223425	0.939582	14
CCNJL	chr5-160293886-160294488	0.939582	12
KLRC1	chr12-10307687-10307923	0.9395	12
KIFC3	chr16-57890377-57890651	0.939495	13
ZNF577	chr19-51735767-51736467	0.939486	12
CRLF2	chrX-1268388-1269026	0.939458	10
FBN2	chr5-128536935-128539290	0.939431	10
IL1R2	chr2-101516790-101518014	0.939416	12
CATIP	chr2-217899454-217899770	0.93941	11
SLC24A4	chr14-92492206-92492480	0.939399	13
THBD	chr20-23195687-23196056	0.939393	10
DTHD1	chr4-36281327-36281639	0.939385	12
LINC00964	chr8-124838505-124838713	0.939367	8
HCAR2	chr12-122400410-122400870	0.93934	12
TREML4	chr6-41228146-41229216	0.939291	6
SLC24A4	chr14-92487577-92488129	0.939284	13
PLD4	chr14-104924539-104924916	0.93928	12
LILRA2	chr19-53823646-53824692	0.939252	13
PRKCH	chr14-61385392-61385680	0.939248	17
CST3	chr20-23145273-23145653	0.939242	13
IL31RA	chr5-56183299-56183913	0.939185	9
TIMP2	chr17-78866597-78866986	0.939178	13
PAX5	chr9-37565599-37565958	0.939172	12
MGST1	chr12-16348926-16349378	0.939163	10
HAVCR2	chr5-157106676-157107759	0.939134	14
IL1RN	chr2-112793330-112793903	0.939121	13
MPHOSPH6	chr16-82192421-82193151	0.939121	15
FAM20C	chr7-901172-901826	0.939091	13
HLA-DRB1	chr6-33027630-33028761	0.939077	15
G0S2	chr1-209673917-209674117	0.939065	13
CD300E	chr17-74623525-74624328	0.938972	14
SDC2	chr8-96926474-96927429	0.938923	11
FPR1	chr19-51433015-51433353	0.938894	12
CSF3R	chr1-35800082-35800694	0.938887	14
IL1R1	chr2-101534123-101534691	0.938874	12
PMP22	chr17-15942316-15942715	0.938866	11
GPCPD1	chr20-5863108-5863674	0.938856	12
KLRC1	chr12-10285775-10286318	0.938842	15
DNAAF1	chr16-84806068-84806896	0.938793	14
PTAFR	chr1-28156708-28157103	0.938753	11
PDLIM7	chr5-177545518-177546749	0.93873	14
SULF2	chr20-47768076-47768599	0.938709	14
PAX5	chr9-37034215-37034616	0.938665	13
HOMER3	chr19-18173051-18174176	0.938644	13
TMEM164	chrX-110086699-110088098	0.938588	15
MN1	chr22-27112877-27113881	0.938584	13
SEMA3F	chr3-50170721-50171004	0.938552	13
HRH2	chr5-175853348-175853948	0.938515	11
KREMEN1	chr22-29152668-29153164	0.938469	14
LINC00964	chr8-124825025-124825753	0.938428	8
LILRB4	chr19-54247229-54248641	0.938411	11
SCUBE2	chr11-9158903-9159382	0.93837	6
NCR1	chr19-54835165-54835885	0.938358	11
IL1R2	chr2-101534123-101534691	0.938355	11
GABARAP	chr17-7093936-7094690	0.938263	13
PIK3CB	chr3-138078846-138079310	0.938253	13
CLEC7A	chr12-10167264-10167995	0.938244	14
THEMIS2	chr1-27884781-27885323	0.938236	14
ETV6	chr12-11719523-11720084	0.938156	15
NLRP12	chr19-54100425-54100981	0.938127	13
PPCDC	chr15-75167673-75168077	0.938125	14
PTGDR	chr14-51596274-51596893	0.938037	10
IL1R2	chr2-101630286-101630685	0.938003	12
FYN	chr6-111837013-111838295	0.93796	15
CCR1	chr3-46312224-46313286	0.937952	12
CXCL2	chr4-74230599-74231492	0.93795	13
CXCL8	chr4-73721960-73722212	0.937935	9
IL1RN	chr2-112784172-112784898	0.93792	14
NPC2	chr14-75268897-75269115	0.937898	14
IL1R1	chr2-101117849-101118099	0.937883	13
IL1RN	chr2-113218306-113218773	0.937841	13
ITK	chr5-157193520-157193960	0.93779	14
SLC26A2	chr5-149940126-149940408	0.937772	13
IFITM10	chr11-2561155-2561377	0.937729	13
SIRPB2	chr20-1489449-1490269	0.937727	9
FCAR	chr19-54642707-54644391	0.937694	13
PTGS2	chr1-186655914-186656246	0.937672	14
ETS2	chr21-38959042-38959517	0.937591	14
CSF1R	chr5-150058569-150059046	0.937576	13
TIAM1	chr21-31343660-31344410	0.93757	14
EVI5	chr1-93706059-93706326	0.937446	14
RALGPS2	chr1-178575634-178576132	0.937442	10
CIITA	chr16-11560400-11561055	-0.937431	14
SEMA3F	chr3-50300056-50300552	0.937426	13
TBK1	chr12-64451645-64453106	0.937424	16
SIRPB1	chr20-1490964-1492499	0.93738	13
VEGFA	chr6-43798684-43799116	0.937367	15
BANK1	chr4-101806562-101807719	0.937318	14
DHX34	chr19-46733283-46733564	0.937312	13
HLA-DRB5	chr6-32437075-32437761	0.937257	15
DAPK1	chr9-87601133-87601556	0.937255	14
KIR2DL4	chr19-54803337-54803945	0.93725	11
E2F6	chr2-11203275-11203912	0.937238	14
KLRC1	chr12-10303941-10304478	0.937204	13
TMEM52B	chr12-9764500-9765447	-0.937199	9
TC2N	chr14-91867423-91867649	0.93718	14
BCAR3	chr1-94713422-94714096	0.937175	13
ATG7	chr3-11159142-11159946	0.937166	11
OSCAR	chr19-53849230-53849526	0.937163	11
KLRC2	chr12-10285775-10286318	0.937119	14
TRIB1	chr8-124802851-124803157	0.937119	13
FCAR	chr19-55216317-55217236	0.937084	13
PAX5	chr9-37251478-37251865	0.937077	11
PLCL1	chr2-197934056-197934522	0.937028	13
KLRD1	chr12-10301118-10301435	0.937028	11
PLBD2	chr12-113247018-113247366	0.937021	14
PPARG	chr3-12193246-12194056	0.936994	9
NCKAP5L	chr12-49982376-49982889	0.936988	14
SRC	chr20-37222916-37223439	0.936981	13
TMEM170B	chr6-10632843-10633616	0.936957	13
MAFB	chr20-40506225-40507039	0.936911	13
GNLY	chr2-85693762-85694511	0.936911	15
HAS1	chr19-51784496-51785418	0.93691	10
MILR1	chr17-64448540-64449465	0.936893	13
CDK14	chr7-90597241-90597537	0.93685	13
PPCDC	chr15-75162111-75162334	0.936832	11
SNX8	chr7-2641423-2641687	0.936749	14
FPR1	chr19-51426996-51427519	0.936747	12
PRF1	chr10-70610266-70611037	0.936743	14
SLC9A8	chr20-49583473-49583917	0.93671	13
MTHFR	chr1-11790681-11791150	0.936709	13
CD247	chr1-168362667-168363442	0.936589	16
AGAP3	chr7-151038951-151039562	0.936566	15
HLA-DQA1	chr6-33027630-33028761	0.936502	15
GPR84	chr12-54307044-54307743	0.936472	13
ACSS2	chr20-34875695-34876858	0.936446	15
PRLR	chr5-35136304-35136746	0.936366	8
PDGFC	chr4-156968536-156968812	0.936345	10
GNB4	chr3-179450896-179451996	0.936337	16
ACTN1	chr14-68932749-68933034	0.936321	13
RNF130	chr5-179827440-179827921	0.936307	14
C20orf194	chr20-4154796-4155365	0.936307	13
SEMA6B	chr19-4563591-4563858	0.9363	13
TNS3	chr7-47482003-47482404	0.936299	13
DTHD1	chr4-36189368-36190190	0.936295	13
TMCC3	chr12-94643300-94644975	0.936185	14
ST18	chr8-52463922-52464411	0.93617	8
SOCS6	chr18-70334649-70335025	0.936147	12
SP140	chr2-230225246-230226499	0.936099	15
SWAP70	chr11-9855682-9856141	0.936035	11
TNFAIP6	chr2-151325757-151326017	0.936001	12
MS4A1	chr11-60762937-60763322	0.935982	13
IFNGR2	chr21-33434415-33435229	0.935913	14
HLA-DMA	chr6-32588886-32590373	0.935911	16
P2RY8	chrX-1214655-1215692	-0.935879	14
LILRA5	chr19-54660333-54660538	0.93584	10
ARSI	chr5-151270529-151271045	0.935824	13
HCAR2	chr12-122743924-122744497	0.935798	12
TNS1	chr2-217899454-217899770	0.935747	12
THBD	chr20-23224900-23225757	0.935742	13
CSTA	chr3-122769335-122769839	0.935719	13
RIN1	chr11-65814221-65814453	0.935717	13
LRP1	chr12-56320963-56321371	0.935706	13
PGS1	chr17-78591809-78592889	0.935637	14
JDP2	chr14-74488653-74489034	0.935632	14
AP001042.1	chr21-38310504-38310829	0.935586	6
HLA-DQA1	chr6-32690117-32690498	0.935569	13
SMAD6	chr15-66650518-66650784	0.935523	10
PFKFB3	chr10-6398502-6398704	0.935496	14
RORA	chr15-60584427-60584855	0.935488	16
RNF130	chr5-180093698-180093983	0.935482	14
TNFAIP6	chr2-151337657-151338035	0.935454	10
IFI30	chr19-18677940-18678337	0.935432	13
CSF1R	chr5-151056434-151056670	0.935421	12
TCF4	chr18-55384659-55385127	0.935418	13
TNS1	chr2-217078186-217078393	0.9354	10
SHKBP1	chr19-41409282-41410036	0.935377	15
STXBP2	chr19-7159058-7159890	0.935371	13
MS4A6A	chr11-60182533-60183287	0.935286	12
FCAR	chr19-54859077-54859987	0.935269	13
MBOAT7	chr19-53849230-53849526	0.935249	12
JADE3	chrX-46754224-46754944	0.935225	12
EHBP1L1	chr11-65150377-65151479	0.935209	13
TCF4	chr18-56511947-56512313	0.935203	11
HLA-DQA1	chr6-33018821-33019301	0.935198	15
S100A9	chr1-153357554-153357907	0.935196	13
SLC43A2	chr17-1206050-1206581	0.935171	14
ACSL4	chrX-109739742-109740292	0.935162	13
HLA-DPB1	chr6-33029102-33030223	0.935149	15
GATA3	chr10-8416007-8417088	0.935118	16
OAZ2	chr15-64692951-64693453	0.935108	14
SPIDR	chr8-47591552-47592583	0.935075	12
OSCAR	chr19-54222398-54223425	0.935042	13
TFCP2L1	chr2-121309579-121310209	0.935039	13
THBS1	chr15-40266923-40267141	0.935024	12
LILRA2	chr19-54207751-54208545	0.934951	13
SEC24A	chr5-135140631-135141730	0.934888	13
SV2C	chr5-76082987-76083501	0.934887	11
KCNMB1	chr5-170268903-170269267	0.934851	13
SIGLEC9	chr19-51798987-51799793	0.934849	9
INHBA	chr7-41777724-41778686	0.934834	12
BMF	chr15-40106684-40107094	0.934772	15
LILRB2	chr19-54662760-54663045	0.934679	13
GSTO1	chr10-104254384-104255995	0.934659	17
HLA-DQB1	chr6-32588886-32590373	0.934657	16
HLA-DMB	chr6-32636958-32637513	0.934589	16
AC002480.2	chr7-22601012-22601666	0.934562	7
SRGAP2	chr1-206834712-206835150	0.934546	13
CSF2RA	chrX-1320174-1320499	0.934471	12
NLRP3	chr1-247435031-247435583	0.934448	13
ZNF608	chr5-124704727-124705248	0.93443	10
DHX34	chr19-47309438-47309981	0.934371	13
HLA-DQA2	chr6-32437075-32437761	0.93437	15
PRAM1	chr19-8640063-8640704	0.934349	14
NECTIN4	chr1-161083031-161083831	0.934335	11
ICOSLG	chr21-43805264-43805710	0.934318	14
KLRD1	chr12-9604120-9604689	0.934281	13
ENG	chr9-127561547-127562265	0.93425	14
SIRPB1	chr20-1944771-1945515	0.934244	12
NFAM1	chr22-43154892-43155177	0.934236	12
LILRB3	chr19-54660333-54660538	0.934213	10
SLC8A1	chr2-40470996-40472065	0.934203	10
SMOX	chr20-4154796-4155365	0.934184	14
USP32	chr17-60161692-60162462	0.934139	13
PHACTR1	chr6-12363383-12363976	0.934132	13
ANPEP	chr15-89821999-89822295	0.934131	14
KCNJ2	chr17-70299254-70299464	0.934068	6
AGAP3	chr7-151808915-151809138	0.934011	12
SLC15A3	chr11-61912580-61912784	0.933993	13
PTAFR	chr1-28313807-28315532	0.93395	13
CPM	chr12-68785266-68785780	0.933929	12
LILRA6	chr19-54373657-54374031	0.933929	13
CCL4	chr17-36105757-36106116	0.933928	13
TMEM104	chr17-74568722-74570002	0.933891	15
TMEM104	chr17-74690380-74690804	0.933834	14
SLFN12L	chr17-35160471-35161822	0.93382	14
TGFBI	chr5-136028675-136029486	0.933772	13
HLA-DRA	chr6-32588886-32590373	0.933743	17
ALDH1A2	chr15-58526128-58526916	0.933732	10
EPB41L3	chr18-5582880-5583749	0.933658	13
LINC01374	chr10-89889668-89889948	0.93359	9
CPQ	chr8-96854570-96854965	0.933561	13
RAB20	chr13-110161158-110161691	0.933542	12
PLEKHG6	chr12-6093165-6093704	0.933499	7
IL13RA1	chrX-118714481-118714796	0.933495	10
PYHIN1	chr1-158932078-158932528	0.933494	13
FCAR	chr19-54875121-54875821	0.93349	13
LILRA2	chr19-54100425-54100981	0.933449	13
LILRA5	chr19-54222398-54223425	0.933426	13
CTSS	chr1-150789322-150789717	0.933389	13
SNU13	chr22-41777832-41778357	-0.933374	14
PNPLA6	chr19-8423171-8424225	0.933288	15
BASP1	chr5-17355605-17356316	0.933286	11
IL1R1	chr2-102127503-102128314	0.933278	14
HLA-DQA2	chr6-32472390-32474225	0.933265	15
ZCCHC24	chr10-79001207-79001671	0.933251	12
CXCL3	chr4-74374349-74375330	0.933217	14
CD8A	chr2-86825550-86826634	0.93318	16
CST3	chr20-23152071-23152754	0.933177	14
LPCAT2	chr16-55508407-55510423	0.933146	13
LRG1	chr19-3710251-3710668	0.933138	12
PILRA	chr7-101108242-101108795	0.933138	11
CDH23	chr10-71867937-71868568	0.933112	12
STK38L	chr12-27180867-27181149	0.9331	12
SIRPB1	chr20-1375642-1376598	0.933098	13
TNS1	chr2-217902671-217903119	0.933092	13
ATP6V0D2	chr8-86108562-86108937	0.933073	7
C20orf194	chr20-4152017-4152220	0.933066	13
MBOAT7	chr19-54222398-54223425	0.933064	15
TTYH2	chr17-74478394-74479133	0.933062	14
CST3	chr20-23655546-23656328	0.933057	14
BCL11A	chr2-60355849-60356572	0.933034	14
RAB39A	chr11-107927880-107929556	0.933017	8
ZCCHC24	chr10-78756564-78757290	0.932958	13
OR2B11	chr1-247406902-247407795	0.932947	11
CCSER2	chr10-84330162-84330573	0.932905	16
LRP1	chr12-56706028-56706240	0.932888	12
HLA-DMA	chr6-32437075-32437761	0.932877	15
CSNK1A1	chr5-149937693-149937935	0.932799	10
HLA-DRB5	chr6-33027630-33028761	0.932796	15
ALCAM	chr3-105351805-105352124	0.932778	12
KCNC3	chr19-49515694-49516141	0.932741	11
NLRP12	chr19-53844898-53845124	0.932723	12
CD36	chr7-80634168-80634774	0.932704	12
SKAP1	chr17-48002306-48002871	-0.932645	13
PRKAG2	chr7-151796292-151796797	0.932644	13
STK17A	chr7-42877762-42878617	-0.932631	15
ANKDD1A	chr15-64897347-64897606	0.932598	13
ZC3H12C	chr11-109972952-109973310	0.932561	13
PDLIM7	chr5-178477099-178477818	0.932472	13
SCARF1	chr17-2120529-2120893	0.932434	12
BANK1	chr4-101850742-101851001	0.932377	9
EBF1	chr5-158848550-158848972	0.932347	10
IL6R	chr1-154454780-154454982	0.93234	12
BEST1	chr11-61671529-61671812	0.932328	13
MLKL	chr16-74936436-74937558	0.932309	15
TIMP1	chrX-47579485-47579843	0.932284	14
DTHD1	chr4-36192859-36193138	0.932279	12
CD93	chr20-23156011-23156458	0.932269	14
CXCL1	chr4-74230599-74231492	0.932165	12
CTSB	chr8-11885932-11886397	0.932163	14
FCRL5	chr1-157806459-157807113	0.932158	12
TMEM189	chr20-50221537-50221801	0.932144	13
TBX3	chr12-114762633-114762994	0.932128	6
ALDH3B1	chr11-67996703-67997331	0.932102	15
TRAT1	chr3-108862808-108863752	0.932091	13
CD9	chr12-6166950-6168291	0.93207	16
PNPLA6	chr19-6720497-6720877	0.932033	13
LINC00964	chr8-125191479-125192176	0.932026	8
HLA-DQA2	chr6-32666197-32666842	0.932024	15
ITGAM	chr16-31386149-31387018	0.932016	16
DERL3	chr22-24831631-24832002	0.932012	12
PLXNB2	chr22-50399672-50400449	0.932006	15
IL13RA1	chrX-118717333-118718352	0.931955	13
JADE3	chrX-46967499-46967736	0.931949	9
CD300LB	chr17-74924320-74924638	0.931933	13
ZNF385A	chr12-54411374-54411821	0.931931	16
AP5B1	chr11-66012728-66013272	0.931909	14
TGFBI	chr5-135999053-135999795	0.931879	13
S1PR3	chr9-89388073-89388656	0.931865	13
SLC2A6	chr9-133862577-133863129	0.93184	15
HRH1	chr3-10173343-10174392	0.931827	8
IL1B	chr2-113103680-113104647	0.93182	13
DNAH17-AS1	chr17-78861885-78862621	0.931803	11
ADGRE2	chr19-15210023-15210778	0.9318	15
NOTCH2	chr1-119564635-119565815	0.9318	13
AGAP3	chr7-151651035-151651363	0.931798	13
PPP2R2B	chr5-146877314-146878901	0.931761	14
KCNMB1	chr5-170307525-170307913	0.931721	12
PTGS1	chr9-122401983-122402812	0.931705	13
INHBA	chr7-41732722-41733238	0.931668	12
PARP8	chr5-50593658-50594007	0.931658	14
RHOH	chr4-40998700-40998918	-0.931646	9
SOCS6	chr18-70429843-70430174	0.931534	13
TRAT1	chr3-108822159-108822755	0.931502	11
ICOS	chr2-203867421-203867865	0.931482	14
S100A11	chr1-151989223-151989751	0.931457	16
HLA-DQB1	chr6-32603920-32604848	0.931397	16
LINC01503	chr9-129762178-129763036	0.931363	12
CD14	chr5-140607103-140607402	0.931358	11
RGS12	chr4-3385266-3385733	0.931315	15
PGS1	chr17-78933935-78934336	0.931309	14
GK5	chr3-142275601-142276305	0.931271	13
ST3GAL6	chr3-97952195-97952643	0.931249	12
IFITM10	chr11-1760435-1760673	0.931243	13
SCN9A	chr2-166375251-166376518	0.931224	13
TMEM51	chr1-15415974-15416364	0.931212	10
NCOR2	chr12-124651676-124652123	0.931206	14
ZC3H12C	chr11-109747566-109748541	0.931158	13
CD8A	chr2-86786028-86786516	0.93112	16
LIPN	chr10-88759323-88760171	0.931107	10
SLC24A4	chr14-92386742-92386949	0.931031	12
SGK1	chr6-134420393-134420893	0.93102	13
PPARG	chr3-12194253-12194634	0.930988	9
KLF4	chr9-107760523-107761262	0.930911	15
MAPK6	chr15-51227899-51228727	0.930903	14
LIPN	chr10-89636970-89637443	0.930883	9
ALDH1A2	chr15-58329867-58330136	0.930871	11
TCN2	chr22-30263327-30263577	0.930848	11
CD93	chr20-23145273-23145653	0.930834	13
RASAL1	chr12-113214622-113215291	0.930824	12
C15orf39	chr15-75124921-75125555	0.930813	15
NPL	chr1-183600179-183600470	0.930768	13
LINC00964	chr8-124266868-124267391	0.930759	8
DAPK1	chr9-87497484-87498730	0.930758	14
P2RX4	chr12-121301908-121302236	0.930742	15
CSF3R	chr1-37454680-37455394	0.93074	14
PROC	chr2-127726077-127726419	0.930719	13
SIGLEC5	chr19-51501466-51502113	0.930705	10
SIRPB1	chr20-1489449-1490269	0.930659	13
RIN1	chr11-65776207-65776478	0.930654	13
MLXIPL	chr7-72805307-72806397	0.930644	12
ARHGAP24	chr4-85701698-85702319	0.930619	11
DTHD1	chr4-36278729-36279081	0.930613	11
PDLIM7	chr5-176899233-176899468	0.930604	15
CD14	chr5-140324540-140325057	0.930559	13
CXCL16	chr17-4769649-4769853	0.930552	12
BCL11B	chr14-99230251-99230496	0.930551	15
IL1A	chr2-112795784-112796159	0.930474	10
PPARG	chr3-12676301-12676558	0.930436	8
CD7	chr17-82317365-82317612	0.930431	16
CREB5	chr7-28408478-28409922	0.930422	15
RAI14	chr5-34587559-34588002	0.930378	10
CLEC4E	chr12-8057428-8058226	0.93036	13
PRKCH	chr14-61360931-61361341	0.930354	16
ITGB8	chr7-20597351-20597599	0.930352	11
FCAR	chr19-54660333-54660538	0.930336	10
BCL3	chr19-44767661-44768150	0.930299	13
PRKAG2	chr7-151651035-151651363	0.930295	13
TBC1D2	chr9-98247980-98249138	0.930286	14
USP32	chr17-59804859-59805402	0.930278	12
LPAR1	chr9-111094260-111094943	0.930243	9
RNF145	chr5-159345462-159345662	0.930209	13
P2RX1	chr17-4844879-4845527	0.930191	14
CLEC4D	chr12-8540490-8541258	0.930136	7
NCF2	chr1-183609034-183609602	0.930127	14
THBS1	chr15-39391148-39391614	0.930122	12
MTMR3	chr22-30273061-30273598	0.930052	14
ADORA2B	chr17-15914325-15915084	0.930039	10
LILRB3	chr19-53829457-53830351	0.930037	13
HMG20B	chr19-4567547-4568119	0.930021	15
BICDL1	chr12-119988311-119990547	0.930005	16
AP5B1	chr11-65290634-65291109	0.929992	13
SLC11A1	chr2-218360417-218360690	0.929966	14
WDFY4	chr10-48667928-48668606	0.929911	14
PCBP1-AS1	chr2-69177403-69178648	0.929886	15
LILRB1	chr19-54593270-54594193	0.929873	14
WARS	chr14-100554220-100554422	0.929831	15
GRN	chr17-43768366-43768695	0.929797	14
SLC11A1	chr2-217850324-217850589	0.929713	13
HCAR3	chr12-122743924-122744497	0.9297	13
MITF	chr3-69353189-69353987	0.929699	10
NCOR2	chr12-124518996-124519380	0.929643	16
RRAS2	chr11-13674209-13674528	-0.929628	13
TTC7B	chr14-90647406-90647738	0.929606	12
TPRA1	chr3-127589980-127591276	0.92953	16
RAB20	chr13-110463838-110464819	0.92953	13
IL3RA	chrX-1274651-1275132	0.929527	14
G0S2	chr1-209659878-209660289	0.929495	14
GPAT3	chr4-83568143-83568406	0.929495	10
FOSL1	chr11-65814221-65814453	0.929487	14
CD300LB	chr17-75428592-75429142	0.929425	11
PMP22	chr17-15232996-15233334	0.929424	11
FLVCR2	chr14-75205465-75205970	0.929404	13
CTTNBP2NL	chr1-113042634-113043040	0.929375	10
THBS1	chr15-39454239-39454859	0.929348	13
HLA-DQB1	chr6-33027630-33028761	0.929348	15
ST3GAL6	chr3-98728621-98728880	0.92924	12
SYTL2	chr11-85750573-85750868	0.929212	16
HLA-DQA1	chr6-32666197-32666842	0.929178	16
LILRA1	chr19-54271044-54272486	0.929176	12
CLEC5A	chr7-141992200-141992493	0.929144	12
ZFHX3	chr16-73082562-73082947	0.929143	11
KLRC3	chr12-9906627-9907260	0.929141	14
LILRB2	chr19-54316863-54317311	0.929136	13
MGLL	chr3-127775459-127776052	0.929135	15
LIPN	chr10-89116210-89116601	0.929132	10
CD3E	chr11-118338502-118339210	0.929126	17
SLC15A3	chr11-61167202-61167719	0.929115	14
LGALS3	chr14-55120469-55120987	0.929051	12
S100A8	chr1-153357554-153357907	0.929017	13
RAPH1	chr2-204255524-204255783	0.929003	13
IL3RA	chrX-1462634-1463182	-0.92894	16
SH3PXD2B	chr5-172886760-172887544	0.928911	9
DENND5A	chr11-9900272-9900516	0.928858	10
IL1RL2	chr2-101463331-101464556	0.928851	13
INHBA	chr7-41869080-41869406	0.92885	12
LILRA6	chr19-55216317-55217236	0.928844	13
ITPK1	chr14-92495011-92495346	0.92884	13
LINC00877	chr3-72629085-72629557	0.928823	13
ACER3	chr11-76335716-76336175	0.928795	13
LATS2	chr13-21060136-21061811	0.928787	16
ACSL1	chr4-184392792-184393218	0.928714	13
ZNF710	chr15-89823391-89823697	0.92871	12
TMEM189	chr20-50979982-50980595	0.928694	14
ARHGAP24	chr4-85841975-85843005	0.928686	10
PLPP3	chr1-56424453-56425526	0.928676	13
TRIO	chr5-14202398-14202822	0.928672	15
MEFV	chr16-2794516-2794760	0.928659	11
PLA2G7	chr6-47169737-47170854	0.928616	11
NCOA3	chr20-47439968-47440242	0.928586	12
ATP6V0A1	chr17-41778811-41779240	0.928548	14
KIR2DL1	chr19-54755779-54756572	0.928483	11
MBOAT7	chr19-53844898-53845124	0.928469	12
LIMK2	chr22-30273061-30273598	0.928462	14
S100A12	chr1-153386388-153386836	0.928456	12
LPCAT2	chr16-55534731-55534939	0.928436	9
NCALD	chr8-102122540-102124612	0.928416	15
SCARF1	chr17-2083487-2084036	0.928408	12
CXCL2	chr4-74327788-74328149	0.928382	13
TNFAIP6	chr2-151374441-151374649	0.928381	9
MAFB	chr20-40497794-40498740	0.928359	13
LGALS2	chr22-37610771-37611100	0.928345	14
HLA-DMA	chr6-32603920-32604848	0.928331	16
TBC1D30	chr12-63917558-63918626	0.928295	10
LILRA1	chr19-54207751-54208545	0.92827	13
ADAMTSL4-AS1	chr1-149931255-149931640	0.92826	13
GLUD1	chr10-87657397-87657841	0.928258	13
HLA-DQB1	chr6-33029102-33030223	0.928192	15
CDCP1	chr3-45987823-45988329	0.928175	10
KLRF1	chr12-9604120-9604689	0.928164	13
JDP2	chr14-75249184-75250183	-0.928161	15
NCEH1	chr3-171966839-171967672	0.928156	13
CDH23	chr10-71364512-71364987	0.928146	13
BAIAP2	chr17-81056373-81056576	0.928115	14
RUSC2	chr9-35491893-35492398	0.928106	11
GIPR	chr19-45667598-45668289	0.928018	14
BEST1	chr11-61701523-61701818	0.928017	13
SKAP1	chr17-48429161-48430392	0.927991	15
CAMSAP1	chr9-136521597-136521842	0.927978	14
CTNNB1	chr3-40922836-40923882	0.927963	15
NCF2	chr1-183600179-183600470	0.927956	13
S100A11	chr1-151992371-151992763	0.92792	17
NCR1	chr19-54906797-54907068	0.92791	12
TMEM52B	chr12-10184274-10184766	0.927907	9
LIPN	chr10-89251155-89252200	-0.927893	10
MPEG1	chr11-60185293-60185552	0.927875	12
MIR3945HG	chr4-184339411-184339889	0.927866	13
FTH1	chr11-62033262-62034000	0.927864	15
THBD	chr20-23021768-23022258	0.927856	12
IQCJ-SCHIP1	chr3-158810618-158811446	0.927843	10
SLC43A2	chr17-1188715-1189470	0.927837	13
COQ2	chr4-83316357-83316817	0.927821	13
PDGFC	chr4-156970686-156972251	0.927819	10
CATIP-AS1	chr2-218731530-218731873	0.927817	12
CEP170	chr1-243264610-243264987	0.927809	14
TGFBI	chr5-136020097-136020800	0.927801	13
PITPNA	chr17-1715212-1715484	0.927758	15
DOCK5	chr8-25226780-25227161	0.927755	14
OLR1	chr12-10171701-10172356	0.927748	13
SLC7A11	chr4-138305010-138305469	0.92772	12
PPFIA1	chr11-70325733-70326092	0.927716	13
FCN1	chr9-134922493-134923138	0.927716	13
GPATCH2L	chr14-75614197-75614453	0.927715	11
PIK3IP1	chr22-31917024-31917909	-0.927712	13
CLEC5A	chr7-142556722-142557000	0.927675	13
CCR1	chr3-46405062-46405992	0.927662	12
OAF	chr11-119538640-119539070	0.927648	13
SLC7A11	chr4-138392396-138393299	0.927648	13
RHBDL3	chr17-31451233-31451795	0.927596	8
SEMA6B	chr19-4559522-4559880	0.927573	13
FAM20C	chr7-213706-213938	0.927571	11
CPNE8	chr12-38904614-38907077	0.927563	15
EMILIN2	chr18-2857308-2858186	0.927527	14
AGAP1	chr2-235669220-235669865	0.927508	11
RETN	chr19-7655358-7655947	0.927464	13
LILRA2	chr19-54642707-54644391	0.92745	13
NCOA4	chr10-45380882-45381209	0.927434	13
FGD6	chr12-95205161-95205432	0.927414	13
PDE4DIP	chr1-148424142-148424570	0.927396	13
PPCDC	chr15-74588483-74588899	0.927316	13
APOBEC3A	chr22-38213331-38213618	0.927313	14
TGFBI	chr5-135493477-135493709	0.927275	11
HLA-DRA	chr6-33018821-33019301	0.92727	16
DAGLA	chr11-62427506-62428242	0.927259	11
CCL5	chr17-35890813-35891129	0.927245	15
ANO6	chr12-45324455-45324750	0.927233	12
MYOF	chr10-93436683-93437832	0.927213	11
PGS1	chr17-78568057-78568341	0.927196	12
CUX1	chr7-101796777-101797146	0.927192	10
CTNNA1	chr5-138724441-138724771	0.927157	14
SPTAN1	chr9-128053512-128053953	-0.92714	13
ARHGEF10L	chr1-17233490-17234072	0.927081	11
LILRA1	chr19-54100425-54100981	0.927061	12
EPHA4	chr2-221517238-221518864	0.927052	15
CDCP1	chr3-45122880-45123537	0.927041	8
LRRK1	chr15-100940667-100941831	0.927011	12
FAM102A	chr9-127835509-127836328	-0.926957	15
HLA-DRB5	chr6-32472390-32474225	0.926952	15
TGFBI	chr5-135437186-135437788	0.926909	13
THBS1	chr15-40388422-40389290	0.926898	13
MAST2	chr1-45802536-45804350	0.926807	14
RHBDL3	chr17-31679865-31680471	0.92678	8
COL23A1	chr5-178357060-178357375	0.926762	9
QSOX1	chr1-181112467-181112830	0.926746	13
RNF144B	chr6-18413419-18413693	0.926693	12
ICOSLG	chr21-44865454-44866030	0.926641	15
JDP2	chr14-75614808-75615695	0.926618	15
SLCO5A1	chr8-69759978-69760326	0.926599	12
GADL1	chr3-30778897-30779357	0.926532	6
LARGE1	chr22-33563229-33563506	0.926529	9
LLGL2	chr17-75534878-75535645	0.926515	15
CXCL3	chr4-73704324-73705026	0.926497	14
HLA-DQA1	chr6-32944031-32944632	0.926496	16
HLA-DRA	chr6-32603920-32604848	0.926494	17
SERPINB10	chr18-63882599-63882840	0.926477	7
RETN	chr19-7507701-7508191	0.926465	14
RIN2	chr20-19725860-19726459	0.926405	12
LEF1	chr4-108155373-108155637	0.926336	13
SPOCK2	chr10-72257074-72257403	-0.92629	16
NNMT	chr11-114065894-114066660	0.926275	7
IL2RB	chr22-36860637-36861345	-0.926272	15
HHEX	chr10-92756174-92757641	0.926266	15
HMG20B	chr19-3548695-3548945	0.926203	14
FNDC3B	chr3-171966839-171967672	0.926132	13
HLA-DRB1	chr6-33029102-33030223	0.926098	15
ZC3H12C	chr11-110098545-110098861	0.926094	14
NACC2	chr9-136533839-136534070	0.925967	16
ATF3	chr1-212488375-212488905	0.925958	15
CTSD	chr11-1770546-1770784	0.925944	12
PPP1R3B	chr8-9074568-9075411	0.925936	14
KRT86	chr12-52308039-52308744	0.925927	13
VMO1	chr17-4759755-4760211	0.925922	10
LILRB3	chr19-55216317-55217236	0.925906	15
CLEC12A	chr12-10182290-10183023	0.925867	12
LAMB3	chr1-209648966-209649576	0.925851	14
RIN1	chr11-66443415-66443973	0.925851	13
LINC01010	chr6-134447679-134448406	0.925847	8
SQSTM1	chr5-179818724-179819220	0.925846	16
ARHGEF10L	chr1-17307950-17308818	0.925829	11
SLC43A2	chr17-2083487-2084036	0.925745	14
ARSI	chr5-151257677-151257921	0.925728	12
HLX	chr1-221182691-221183469	0.925681	14
CRLF2	chrX-1322394-1322638	0.92568	10
IL1R2	chr2-102282620-102283147	0.925674	12
MID1IP1	chrX-39062844-39063768	0.925664	11
IQCJ-SCHIP1	chr3-158801236-158802824	0.92565	10
NRIP1	chr21-15210162-15210596	0.92563	14
VEGFA	chr6-43709347-43709557	0.92562	13
TC2N	chr14-91405234-91405673	0.925603	15
TRPS1	chr8-115055856-115056872	0.925547	14
LILRB2	chr19-54222398-54223425	0.925525	14
PAX5	chr9-37037304-37037520	0.925522	13
PAX8-AS1	chr2-112799050-112799745	0.925475	14
TUBB6	chr18-12307238-12308988	0.925463	15
LRG1	chr19-4870096-4870399	0.925443	12
IL18RAP	chr2-102262006-102262955	0.925428	14
MAPKAPK3	chr3-50525983-50526335	0.925424	15
SCARF1	chr17-1095139-1095983	0.925388	12
DAPK1	chr9-87560320-87560626	0.925361	14
CSF2RA	chrX-1333004-1333253	0.925349	11
BTBD19	chr1-43867986-43868242	0.925334	13
TTC7B	chr14-90299391-90299772	0.92532	13
ARSI	chr5-150429247-150429873	0.925311	13
HMGA1	chr6-33445051-33445535	0.925298	13
CD300LB	chr17-74238991-74239585	0.925282	12
SMOX	chr20-4152017-4152220	0.92526	14
AMZ1	chr7-2772679-2773332	0.925245	13
UPB1	chr22-24550061-24550659	0.925244	13
HLA-DQA1	chr6-32472390-32474225	0.925222	15
HLA-DRB1	chr6-33018821-33019301	0.92522	16
DHX34	chr19-47315151-47315697	0.925209	15
LILRB4	chr19-54207751-54208545	0.925203	11
LARGE1	chr22-33896067-33896427	0.925196	9
DAGLA	chr11-61701523-61701818	0.925188	11
AC061992.2	chr17-78591809-78592889	0.925185	9
LST1	chr6-30752265-30752932	0.925167	14
MARCO	chr2-118953956-118955071	0.925115	10
SWAP70	chr11-9738813-9739522	0.925112	15
LYN	chr8-55939080-55940262	0.925108	15
SEMA6B	chr19-4567547-4568119	0.925104	14
C5AR2	chr19-47383356-47383692	0.925092	12
ARHGAP24	chr4-85725241-85726216	0.925089	11
APOBEC3A	chr22-38957143-38957642	0.925088	14
CD247	chr1-167446078-167446318	0.925069	14
NRP2	chr2-205698778-205699316	0.925065	13
RHOU	chr1-229070143-229070481	0.925048	12
ZMYND15	chr17-3802933-3803423	0.925035	11
LILRB2	chr19-54100425-54100981	0.924972	13
CD247	chr1-167491899-167492850	0.924909	16
RBM38	chr20-57374450-57375659	-0.924803	16
OLIG1	chr21-33010973-33011890	0.924766	11
SULF2	chr20-47784789-47786753	0.924745	15
CXCL2	chr4-73731895-73732333	0.924733	12
ZFAND5	chr9-73219405-73220653	0.924699	14
CSF1R	chr5-151063118-151063466	0.924676	13
CD247	chr1-167516535-167518696	0.924666	16
KIR2DL1	chr19-54804189-54804617	0.924649	10
KLF4	chr9-107750704-107750980	0.924588	13
SCARF1	chr17-1577068-1577921	0.924582	12
DENND5A	chr11-8334016-8334317	0.924565	12
MARCKS	chr6-113718895-113720073	0.924524	12
FPR1	chr19-52538951-52539158	0.924485	13
TGFBI	chr5-135977376-135978243	0.924481	13
NCOR2	chr12-124756265-124756517	0.924451	14
NEK6	chr9-124196985-124197934	0.924449	15
PRAM1	chr19-7507701-7508191	0.924448	14
RASGRP1	chr15-38130715-38131307	-0.924407	13
TBXAS1	chr7-139853604-139854483	0.924402	13
CD9	chr12-6899474-6900241	0.924394	14
FOSL1	chr11-66012728-66013272	0.924349	14
HLA-DPA1	chr6-33027630-33028761	0.924319	15
UBAP1	chr9-35114845-35115177	0.924317	16
CD84	chr1-161083031-161083831	0.924287	15
TRIB1	chr8-125429208-125430341	0.924286	15
MITF	chr3-69777040-69777507	0.924252	9
CDK14	chr7-90612493-90613599	0.924232	13
LILRB4	chr19-54311418-54313175	0.924231	11
NEK6	chr9-124261214-124261510	0.924223	14
JARID2	chr6-15066571-15067333	0.924212	15
CLEC4E	chr12-8052587-8052970	0.924158	12
ANPEP	chr15-89093993-89094510	0.924152	14
HBEGF	chr5-140607103-140607402	0.92412	11
FAM20C	chr7-1156709-1156950	0.924105	13
TNS1	chr2-218678996-218679920	0.924099	12
BICDL1	chr12-120011892-120012658	0.924098	16
TLR2	chr4-153660900-153661749	0.924097	13
SASH1	chr6-149259350-149260124	0.924064	9
VASH1	chr14-76767849-76768854	0.924055	15
SEMA3F	chr3-50627296-50627836	0.924035	13
CRLF2	chrX-1274651-1275132	0.924023	10
MTHFR	chr1-11960610-11961053	0.924006	14
LINC01503	chr9-129575000-129575439	0.923999	10
PRKCQ	chr10-6529935-6530651	0.923996	13
PLAUR	chr19-43669798-43670362	0.923974	16
MBOAT7	chr19-54302312-54302650	0.923965	14
LILRB1	chr19-54642707-54644391	0.923923	13
UBTD2	chr5-172409988-172410458	0.923916	15
SLC9A8	chr20-48908770-48909084	0.923915	14
CD96	chr3-111392560-111393240	0.923837	14
AP5B1	chr11-65776207-65776478	0.923821	13
BCL2	chr18-63285047-63285666	0.923794	13
TC2N	chr14-92400542-92401148	-0.923742	13
ANXA5	chr4-121689953-121690323	0.923742	15
HLA-DPB1	chr6-33027630-33028761	0.923723	15
CDA	chr1-21317268-21317633	0.923711	13
PTPN6	chr12-6899474-6900241	0.923703	15
BLNK	chr10-96244170-96244788	0.923701	10
PLEKHG2	chr19-39397523-39398685	0.923562	16
JARID2	chr6-14921118-14922702	0.923547	15
LILRA4	chr19-54937866-54938216	0.923522	10
MAPK6	chr15-51585618-51586376	0.923515	11
RCAN3	chr1-24506991-24507637	0.923502	16
LILRA5	chr19-54572206-54573094	0.923491	13
MBOAT7	chr19-54747397-54747895	0.923468	11
ALCAM	chr3-105353405-105354095	0.923423	14
ITGAM	chr16-31354979-31355218	0.923414	16
BNIP3L	chr8-27371812-27372104	0.923407	14
TRIB1	chr8-125696833-125697103	0.923404	15
ACSM3	chr16-21263718-21264034	0.923299	11
LIPN	chr10-88848455-88848810	0.923293	10
ADPRH	chr3-119637673-119639272	0.923287	13
BCL11B	chr14-98983961-98985110	0.923276	14
MAPK6	chr15-51576366-51577513	0.923266	13
GGA1	chr22-38406527-38406972	0.923252	12
CRYBG3	chr3-98730320-98730619	0.923183	13
GATA3	chr10-8365860-8366337	0.923154	15
HLA-DPB1	chr6-32603920-32604848	0.923149	17
SLC37A2	chr11-125072377-125072717	0.923148	12
TMEM104	chr17-75096083-75096476	0.92314	15
MET	chr7-116678617-116679103	0.923101	12
CST3	chr20-23541209-23541622	0.923066	14
LINC01010	chr6-134437031-134437773	0.92304	8
SLC24A4	chr14-91361135-91361460	0.923	13
LINC00964	chr8-125722126-125722365	0.922985	8
F3	chr1-94720015-94720772	0.92296	11
MICAL3	chr22-17994784-17995015	0.922918	12
LINC01412	chr2-144701093-144702322	0.92288	6
UBAP1	chr9-33759444-33759946	0.922843	14
SERPINB10	chr18-63859683-63860376	0.922828	7
AGAP3	chr7-150489524-150490145	0.922818	11
ACPP	chr3-132316828-132317569	0.922799	8
TSPAN33	chr7-129146472-129146855	0.922791	15
PPARG	chr3-12345086-12345467	0.922767	7
KYNU	chr2-142873327-142873685	0.922763	13
NTSR1	chr20-63686361-63687219	0.922752	9
CD7	chr17-82200415-82201124	0.922726	16
CATIP	chr2-218360417-218360690	0.922716	11
CLEC4C	chr12-7752444-7752831	0.922702	9
GRK3	chr22-26432621-26432857	0.922618	14
SGK1	chr6-134412879-134413726	0.922611	13
DTX4	chr11-59272800-59273894	0.922594	14
PAX5	chr9-37066063-37066468	0.922588	13
GPCPD1	chr20-6008235-6008513	0.922551	13
BANK1	chr4-101843147-101843358	0.922538	10
MERTK	chr2-111670895-111671761	0.922495	13
SPRED1	chr15-38307267-38307613	0.922476	11
HLA-DQA1	chr6-32603920-32604848	0.922473	16
GNLY	chr2-85684479-85685047	0.922469	14
KRT86	chr12-52566472-52567255	0.922438	13
SLC35E4	chr22-29820978-29821819	0.922413	13
LRRC25	chr19-18967262-18968028	0.922409	14
FLVCR1	chr1-212916232-212917073	0.922382	15
PRF1	chr10-70603335-70603825	0.922368	14
CTSZ	chr20-59007795-59008503	0.922318	15
MARCO	chr2-119282333-119283025	0.922318	10
HLA-DPB1	chr6-32588886-32590373	0.922281	17
ABR	chr17-1039450-1040248	0.922268	15
TIMP2	chr17-78872530-78872790	0.922248	13
P4HA2	chr5-132387635-132388013	0.922232	10
TMEM52B	chr12-10027343-10028126	0.922177	9
GLUD1	chr10-87739638-87740638	0.922155	13
LINC00299	chr2-8511953-8512407	0.922135	14
LIPN	chr10-89255889-89256134	0.922105	10
FCN1	chr9-134366228-134366462	0.922103	13
CD40	chr20-46108310-46108756	0.922092	13
EMILIN2	chr18-3747148-3747901	0.922079	13
HLA-DMA	chr6-33018821-33019301	0.922077	15
HLA-DMB	chr6-32690117-32690498	0.922068	13
CPEB4	chr5-173866215-173866855	0.92203	14
PLA2G7	chr6-46770856-46771748	0.921989	11
ATP6V0A1	chr17-42928299-42929489	0.921984	14
PLD4	chr14-104926581-104926801	0.921969	12
BCL11A	chr2-60317831-60318235	0.921964	11
CEBPD	chr8-47734930-47735468	0.92196	15
OSCAR	chr19-54952238-54952824	0.921935	12
TOX	chr8-59117703-59120002	0.921905	16
SAMD3	chr6-130183461-130184297	0.921903	14
TFPI	chr2-186575102-186575654	0.921895	14
SIRPA	chr20-1943439-1943976	0.921892	11
TCL1A	chr14-95725430-95726285	0.921844	12
RASAL1	chr12-113040578-113041246	0.921843	12
BCL11A	chr2-60350905-60351114	0.921841	13
LUCAT1	chr5-91301432-91301841	0.921822	13
ATG16L2	chr11-72584253-72584775	0.921802	16
IGF2BP3	chr7-22661712-22663050	0.921796	13
FCAR	chr19-54763954-54764540	0.921751	12
LPCAT2	chr16-55444054-55445452	0.921749	13
TNS3	chr7-47581553-47582271	0.921747	14
UBXN11	chr1-27111735-27112435	0.921732	14
CREG1	chr1-167796975-167797376	0.921711	14
WDFY4	chr10-48576941-48577465	0.921624	14
HCAR2	chr12-122716182-122716988	0.921568	12
SLC15A3	chr11-60919390-60919642	0.92156	13
RFX8	chr2-101395948-101396569	0.921517	7
LILRA5	chr19-53844898-53845124	0.921486	12
ETS2	chr21-37863812-37864182	0.921473	13
PLBD2	chr12-113271686-113272240	0.921441	13
TSPAN33	chr7-128938894-128939807	0.921435	15
CLEC4D	chr12-8452848-8453552	0.921409	7
IL3RA	chrX-1239322-1240525	0.921402	15
NDST1	chr5-150058569-150059046	0.921386	12
VAV2	chr9-134174042-134174280	0.921377	13
NDST1	chr5-151056434-151056670	0.921349	11
ARSI	chr5-151255936-151256144	0.921257	13
HLA-DMB	chr6-32472390-32474225	0.921256	15
CHST15	chr10-124142730-124143344	0.921242	13
IFI30	chr19-17579523-17580213	0.921221	13
OSCAR	chr19-54209540-54210337	0.921205	13
RIN1	chr11-67078017-67078893	0.921189	13
TFEC	chr7-116786686-116787267	0.921174	13
HPSE	chr4-83329768-83330039	0.921157	11
RNF125	chr18-32018064-32020509	0.921138	17
TCIRG1	chr11-67996703-67997331	0.921137	15
AHR	chr7-17371659-17371963	0.921119	13
LILRA5	chr19-54662760-54663045	0.921047	13
HLA-DQB1	chr6-32690117-32690498	0.921006	14
BCL11B	chr14-99262193-99262769	0.920993	16
P2RX4	chr12-121278221-121278777	0.920967	14
SLC24A4	chr14-92724326-92724824	0.920943	13
LILRB4	chr19-54572206-54573094	0.920926	11
RBM47	chr4-40564065-40564342	0.920815	12
MLXIPL	chr7-74477726-74478437	0.920808	12
PKIG	chr20-43681277-43682678	0.920789	14
HLA-DPA1	chr6-32588886-32590373	0.920775	17
NDST1	chr5-150065987-150066247	0.920769	11
H2AFY	chr5-136020097-136020800	0.920755	14
CD300LF	chr17-75096083-75096476	0.920747	15
SERPINB10	chr18-63869124-63870573	0.920745	7
EREG	chr4-73704324-73705026	0.920745	14
STAT4	chr2-191114185-191114895	0.920706	15
SLC22A4	chr5-132387635-132388013	0.920697	13
RILPL2	chr12-123444093-123444585	0.920668	14
MILR1	chr17-63641527-63642135	0.920643	13
MEF2C	chr5-88731935-88732906	0.920618	15
ZSWIM7	chr17-15237967-15238969	0.920605	12
CPD	chr17-30351793-30352590	0.920571	14
C5AR2	chr19-47309438-47309981	0.920527	11
IL1A	chr2-112032712-112033939	0.920502	10
ADAMTS2	chr5-179393080-179393438	0.9205	6
LILRA2	chr19-54859077-54859987	0.920499	13
CCDC88A	chr2-54535688-54536062	0.920485	13
SH3RF1	chr4-168881046-168881881	0.920468	14
MOB3B	chr9-27599003-27599709	0.920454	13
CCR7	chr17-40577493-40578022	0.920453	12
PPIF	chr10-79295521-79295861	0.920434	14
IL1RN	chr2-112795784-112796159	0.920425	13
FMNL2	chr2-152468839-152469488	0.920381	12
SDC2	chr8-96963077-96963586	0.920299	12
DNAH17	chr17-78384085-78384411	0.920285	11
VIPR2	chr7-159144257-159145437	0.920238	14
FAM102A	chr9-128028559-128028787	0.920206	15
DAGLA	chr11-61688564-61689153	0.920177	11
PLCXD1	chrX-1222276-1223417	0.920164	15
SLC11A1	chr2-218745173-218745607	0.920161	14
SNHG1	chr11-63845141-63845618	-0.920149	14
ST14	chr11-130159548-130160010	0.920066	13
MLXIPL	chr7-73715618-73715943	0.92005	12
CAMKK1	chr17-4725581-4726175	0.92004	13
NCOA3	chr20-47412084-47412949	0.920003	14
NEK6	chr9-124267227-124267805	0.919995	15
LIPN	chr10-88851551-88852035	0.919989	10
SDC4	chr20-44660414-44660803	0.919979	13
TMEM189	chr20-50423257-50423541	0.91993	13
WARS	chr14-99603375-99605512	-0.919923	16
RPS12	chr6-132745949-132746442	-0.919922	14
TRAT1	chr3-108834570-108835453	0.919907	13
ETS2	chr21-38797353-38797762	0.919905	14
HLA-DQA2	chr6-32636958-32637513	0.919897	15
SNAI1	chr20-50283656-50284296	0.91989	14
MAFG	chr17-81735413-81736046	0.919882	15
NEK6	chr9-124238843-124239946	0.91985	15
CLEC4D	chr12-8565940-8566803	0.919847	7
TNFRSF13C	chr22-42655600-42656013	0.919839	12
RBM47	chr4-40576665-40577492	0.919828	14
GATA3	chr10-8402461-8402901	0.919787	15
PDGFC	chr4-156946480-156947201	0.919785	10
KLF4	chr9-107489447-107490365	0.919785	15
RASSF2	chr20-5657383-5657776	0.919764	12
PLXDC2	chr10-19832663-19833148	0.919738	13
RCOR1	chr14-103361753-103362226	0.919735	13
MAP3K8	chr10-30432937-30434715	0.919728	17
UBTD2	chr5-172794086-172794403	0.91972	13
PLCL1	chr2-197954124-197954688	0.919683	12
CAMKK2	chr12-121301908-121302236	0.91968	14
PRAM1	chr19-8423171-8424225	0.919656	15
CD28	chr2-203936466-203936802	0.919632	15
PRKAG2	chr7-151806085-151806549	0.919625	13
RAB32	chr6-146543034-146544670	0.919607	16
GRK3	chr22-25566974-25567199	0.919591	13
TTC7B	chr14-89912365-89913208	0.919588	13
PALD1	chr10-70126184-70126449	0.91956	13
LILRA5	chr19-54100425-54100981	0.919546	13
HLA-DRA	chr6-32437075-32437761	0.919534	16
RPL3	chr22-38406527-38406972	-0.919456	13
HCK	chr20-32051140-32051572	0.919439	14
FGFBP2	chr4-15996815-15997132	0.919421	14
HLA-DQA1	chr6-32636958-32637513	0.919377	16
RRAGD	chr6-89009706-89010128	0.91937	14
KLRK1	chr12-10186335-10186685	-0.919365	13
TMEM170B	chr6-11350175-11350827	0.919363	13
ACSL4	chrX-109839969-109840922	0.919351	14
RALGPS2	chr1-178581304-178581632	0.919347	10
CD300E	chr17-74238991-74239585	0.919317	13
KLRC1	chr12-10197883-10198134	0.919314	15
CAMK2A	chr5-149680316-149681210	0.91928	13
PTAFR	chr1-27864166-27864541	0.919276	13
MAFB	chr20-40683179-40683748	0.919269	12
AC104695.4	chr2-28360941-28361231	0.919246	14
RAI14	chr5-34500484-34500768	0.919224	11
MUC12	chr7-101016693-101017741	0.919195	13
CTBP2	chr10-125160785-125161627	0.919179	16
KCNE1	chr21-34200302-34200643	0.919171	10
RAB32	chr6-146357466-146358979	0.919134	15
FLVCR2	chr14-75422087-75422435	0.919101	12
MYO9B	chr19-17173407-17173684	0.919092	13
LILRA2	chr19-54373657-54374031	0.919055	13
P3H2	chr3-190983817-190984154	0.91904	8
SIRPA	chr20-1375642-1376598	0.919022	14
XPO4	chr13-21069549-21069996	-0.919012	12
NRIP1	chr21-15221716-15222411	0.918961	15
LIMK2	chr22-30279132-30279720	0.918948	14
CXCR5	chr11-118883377-118883959	0.918947	14
IL31RA	chr5-55868706-55869217	0.918945	9
S100A10	chr1-151989223-151989751	0.918906	16
PRKCH	chr14-61321143-61323195	0.918899	17
OSCAR	chr19-53829457-53830351	0.918889	12
RAPGEF6	chr5-132426520-132426915	-0.918884	16
CCL5	chr17-35879799-35880711	0.918824	16
HLA-DQB1	chr6-33018821-33019301	0.91882	16
GNG7	chr19-1904395-1904634	0.918804	14
CD2	chr1-116737392-116738208	0.918799	16
KCNJ15	chr21-38221075-38221874	0.918771	7
CD6	chr11-60978675-60979185	0.91876	15
OXNAD1	chr3-16305066-16305290	0.918752	13
FCAR	chr19-55116182-55116458	0.918748	13
CD86	chr3-121995024-121995723	0.91865	13
RAB20	chr13-110520192-110521125	0.918648	13
AGFG1	chr2-227407522-227407997	0.918644	13
MLXIPL	chr7-74610201-74610635	0.918644	11
ATXN1	chr6-16729271-16729645	0.91858	14
CCDC149	chr4-24912437-24913188	0.918565	10
FGD4	chr12-32483561-32483813	0.918553	13
[truncated: 29,163 more rows]

## Sheet: Supplementary Table 3
MarkerName	Candidate Gene	In iChip or densely genotyped Region	chr	position	ID	alleleA	alleleB	QTL association(s)	Case-Ctrl Association(s) for significant QTL feature
	SKI	yes	1	2575976	rs4310388	G	T
chr1:2575976:G:T								NA	NA
chr1:63643100:T:C	PGM1	no	1	63643100	rs2269241	T	C	NA	NA
chr1:92358141:G:C	RPAP2	yes	1	92358141	rs34090353	G	C	NA	NA
chr1:93145882:G:A	MTF2	yes	1	93145882	rs190514104	G	A	NA	NA
chr1:113834946:A:G	PTPN22	yes	1	113834946	rs2476601	A	G	NA	NA
chr1:116738074:C:T	CD101	yes	1	116738074	chr1:116738074:C:T	C	T	NA	NA
chr1:119895261:A:G	NOTCH2	no	1	119895261	rs2641348	A	G	NA	NA
chr1:151818382:G:A	TDRKH	no	1	151818382	rs7540530	G	A	NA	NA
chr1:154465420:T:C	IL6R	no	1	154465420	rs2229238	T	C	CD8T: snATAC chr1.154464914.154465338; P=2.6E-7	NA
chr1:155199461:G:A	THBS6	yes	1	155199461	rs115010010	G	A	NA	NA
chr1:160967577:C:A	SLAMF7	yes	1	160967577	rs12732685	C	A	NA	NA
chr1:172746562:A:G	FASLG	yes	1	172746562	rs78037977	A	G	NA	NA
chr1:173247234:A:G	TNFSF4	yes	1	173247234	rs844646	A	G	NA	NA
chr1:192570207:G:A	RGS1	yes	1	192570207	rs2816313	G	A	Monocyte: snRNA RGS1; P=3.0E-7	Monocyte t2: Case>Ctrl P=5.8E-70; Monocyte t3: Case > Ctrl P=7.0E-17
chr1:197843035:C:T	DENND1B	yes	1	197843035	rs10922299	C	T	NA	NA
chr1:198654713:G:T	ATP6V1G3	yes	1	198654713	rs17668272	G	T	NA	NA
chr1:200093261:G:A	NR5A2	no	1	200093261	rs2737665	G	A	NA	NA
chr1:200863456:A:G	DDX59	yes	1	200863456	rs7533782	A	G	NA	NA
chr1:206769068:C:T	FCMR	yes	1	206769068	rs3024495	C	T	NA	NA
chr1:212796238:G:T	TATDN3	no	1	212796238	rs11120029	G	T	NA	NA
chr2:12512805:C:T	AC096559.1	no	2	12512805	rs10169963	C	T	CD4T: snATAC chr2.12514392.12515155 P=2.2E-8; CD8T: snATAC chr2.12074121.12074522 P=1.3E-6	NA
chr2:24874775:A:G	ADCY3	no	2	24874775	rs13407913	A	G	B: snATAC chr2.24926317.24927221 P=2.1E-6; CD4T: snATAC chr2.24926317.24927221 P=4.0E-22; CD8T: snATAC chr2.24926317.24927221 P=5.3E-10; Monocyte: snRNA ADCY3 P=2.4E-7	Monocyte t1 snRNA ADCY3: Case>Ctrl P=6.4E-14; Monocyte t2 snRNA ADCY3: Case > Ctrl P=1.3E-3
chr2:43511034:T:C	PLEKHH2	yes	2	43511034	rs1038822	T	C	CD4T: snATAC chr2.43537017.43537445 P=1.3E-8	NA
chr2:60379872:T:G	AC007381.1	no	2	60379872	rs243027	T	G	NA	NA
chr2:60995008:A:T	KIAA1841	yes	2	60995008	rs6754585	A	T	NA	NA
chr2:100147438:G:T	AFF3	yes	2	100147438	rs12712067	G	T	B: snATAC chr2.100140564.100140927 P=3.0E-6; NK: snRNA AFF3 P=3.6E-6	NK t1 snRNA AFF3: Case<Ctrl P=6.1E-4
chr2:110858727:C:T	BCL2L11	no	2	110858727	rs1533298	C	T	CD4T: snATAC chr2.110858009.110858869 P=2.0E-6; NK: snATAC chr2.110858009.110858869 P=1.2E-7	NA
chr2:136170750:C:T	DARS	no	2	136170750	rs7568884	C	T	NA	NA
chr2:162254026:A:G	IFIH1	yes	2	162254026	rs2111485	A	G	NA	NA
chr2:181109527:CAGAG:C	UBE2E3	yes	2	181109527	rs376644292	CAGAG	C	NA	NA
chr2:191105394:C:G	STAT4	yes	2	191105394	rs7582694	C	G	NA	NA
chr2:203874196:G:A	CTLA4	yes	2	203874196	rs3087243	G	A	NA	NA
chr2:241468331:A:G	FARP2	no	2	241468331	rs10933559	A	G	NA	NA
chr3:32415706:G:A	CMTM7	no	3	32415706	rs655754	G	A	B: snATAC chr3.32419792.32420978 P=4.7E-18; CD4T: snATAC chr3.32419792.32420978 P=7.9E-17	NA
chr3:46342713:G:A	CCR5	yes	3	46342713	rs113341849	G	A	NA	NA
chr3:108379790:C:T	CD47	no	3	108379790	rs11707076	C	T	NA	NA
chr3:119560301:G:A	TIMMDC1	yes	3	119560301	rs34394661	G	A	NA	NA
chr3:156979308:G:A	LEKR1	no	3	156979308	rs6780427	G	A	NA	NA
chr3:184384608:C:T	CHRD	no	3	184384608	rs16858778	C	T	NK: snRNA HTR3C P=7.5E-7	NA
chr4:973543:C:A	TMEM175	yes	4	973543	rs113881148	C	A	CD8T: snRNA DGKQ P=9.4E-6	CD8T t2 snRNA DGKQ: Case > Ctrl P=2.6E-3
chr4:26083858:A:G	RBPJ	yes	4	26083858	rs34185821	A	G	NA	NA
chr4:38602849:G:A	KLF3	no	4	38602849	rs337637	G	A	NA	NA
chr4:40212934:A:G	RHOH	no	4	40212934	rs2280307	A	G	NA	NA
chr4:102585287:T:C	NFKB1	no	4	102585287	rs1598859	T	C	B: snATAC chr4.102564290.102564706 P=6.8E-9; CD4T: snATAC chr4.102630452.102631125 P=5.2E-36; CD4T: snATAC chr4.102639615.102639850 P=5.8E-10; CD8T: snATAC chr4.102630452.102631125 P=2.3E-23; CD8T: snATAC chr4.102627799.102628194 P=1.1E-9; NK: snATAC chr4.102525147.102525406 P=2.4E-7	NA
chr4:122322439:A:ATC	IL2/IL21	yes	4	122322439	rs78636954	A	ATC	NA	NA
chr4:165653115:A:G	CPE	no	4	165653115	rs2611215	A	G	NA	NA
chr5:35888101:G:A	IL7R	yes	5	35888101	rs67207043	G	A	NA	NA
chr5:40521603:G:T	PTGER4	yes	5	40521603	rs1876142	G	T	NA	NA
chr5:56146422:T:C	ANKRD55	yes	5	56146422	rs10213692	T	C	NA	NA
chr6:424915:C:A	IRF4	yes	6	424915	rs9405661	C	A	NA	NA
chr6:35392400:T:C	DEF6	yes	6	35392400	rs73413718	T	C	NA	NA
chr6:90267049:G:A	BACH2	yes	6	90267049	rs72928038	G	A	B: snATAC chr6.90251334.90251805 P=2.1E-8; CD4T: snATAC chr6.90266659.90267614 P=3.3E-17; CD4T: snATAC chr6.90251334.90251805 P=1.1E-6	NA
chr6:111686822:C:T	FYN	yes	6	111686822	rs804193	C	T	NA	NA
chr6:126343187:C:T	CENPW	yes	6	126343187	rs17754780	C	T	B: snATAC chr6.126339623.126340569 P=8.0E-17; CD4T: snATAC chr6.126339623.126340569 P=2.6E-21; CD8T: snATAC chr6.126339623.126340569 P=2.8E-11; monocyte: snATAC chr6.126339623.126340569 P=2.9E-31; NK: snATAC chr6.126339623.126340569 P=1.1E-8	NA
chr6:127091607:C:CA	RSPO3	yes	6	127091607	rs140418154	C	CA	NA	NA
chr6:127948922:C:T	THEMIS	yes	6	127948922	rs9491889	C	T	NA	NA
chr6:135398362:C:A	AHI1	no	6	135398362	rs2179781	C	A	B: snATAC chr6.135497161.135498732 P=5.4E-17; B: snATAC chr6.135651702.135652570 P=9.1E-10; B: snRNA AHI1 P=1.7E-26; CD4T: snATAC chr6.135497161.135498732 P=2.3E-18; CD4T: snRNA AHI1 P=3.3E-25; CD8T: snATAC chr6.135497161.135498732 P=8.9E-14; CD8T: snRNA AHI1 P=2.7E-26; monocyte: snRNA AHI1 P=1.0E-5; NK: snATAC chr6.135497161.135498732 P=1.3E-7; NK: snRNA AHI1 P=2.3E-9	B t1 snRNA AHI1: Case < Ctrl P=7.6E-5; B t2 snRNA AHI1: Case < Ctrl P=8.4E-5; B t3 snRNA AHI1: Case < Ctrl P=3.6E-5;CD4T t1 snRNA AHI1: Case < Ctrl P=7.5E-30; monocyte t2 snRNA AHI1: Case > Ctrl P=7.3E-3; monocyte t3 snRNA AHI1: Case < Ctrl P=7.0E-6
chr6:137682468:T:C	TNFAIP3	yes	6	137682468	rs12665429	T	C	monocyte: snATAC chr6.137680793.137681188 P=2.4E-9	NA
chr6:159049210:G:T	TAGAP	yes	6	159049210	rs212408	G	T	NA	NA
chr7:20557306:A:G	ABCB5	no	7	20557306	rs17143056	A	G	NA	NA
chr7:22730530:G:A	AC073072.1	no	7	22730530	rs2069845	G	A	NA	NA
chr7:26852706:G:A	SKAP2	yes	7	26852706	rs73069533	G	A	B: snATAC chr7.26863502.26865161 P=2.6E-7; CD4T: snATAC chr7.26863502.26865161 P=3.1E-10; CD8T: snATAC chr7.26863502.26865161 P=5.9E-9; NK: snATAC chr7.26863502.26865161 P=5.8E-7	NA
chr7:28102567:G:T	JAZF1	yes	7	28102567	rs10245867	G	T	CD4T: snATAC chr7.28120314.28120554 P=1.2E-7	NA
chr7:50406053:G:A	IKZF1	yes	7	50406053	rs6944602	G	A	NA	NA
chr7:50970505:G:A	COBL	yes	7	50970505	rs2023879	G	A	NA	NA
chr8:11247568:C:T	MTMR9	yes	8	11247568	rs2572431	C	T	B: snATAC chr8.11250985.11251422 P=2.7E-6; monocyte: snATAC chr8.11250985.11251422 P=9.3E-7	NA
chr8:11877675:G:T	CTSB	yes	8	11877675	rs2250903	G	T	monocyte: snATAC chr8.11874711.11875125 P=6.6E-29	NA
chr8:58973753:T:A	TOX	no	8	58973753	rs12545204	T	A	NA	NA
chr8:118911634:A:G	COLEC10	no	8	118911634	rs4355801	A	G	NA	NA
chr8:127184843:A:G	MYC	no	8	127184843	rs2445610	A	G	CD4T: snATAC chr8.11874711.11875125 P=5.1E-10	NA
chr8:128062656:C:G	PVT1	yes	8	128062656	rs1499363	C	G	NA	NA
chr9:4283137:G:T	GLIS3	yes	9	4283137	rs1574285	G	T	NA	NA
chr9:5410286:G:A	PLGRKT	yes	9	5410286	rs10815209	G	A	NA	NA
chr9:99823263:T:C	NR4A3	no	9	99823263	rs1405209	T	C	NA	NA
chr9:120904499:G:C	TRAF1	yes	9	120904499	rs2241003	G	C	B: snATAC chr9.120905389.120905683 P=1.5E-8; B: snATAC chr9.120842404.120843478 P=8.6E-8; CD4T: snATAC chr9.120842404.120843478 P=2.0E-16; CD4T: snATAC chr9.120890495.120890733 P=5.4E-12; CD8T: snATAC chr9.120842404.120843478 P=6.4E-9; monocyte: snATAC chr9.120842404.120843478 P=6.2E-7; NK: snATAC chr9.120905389.120905683 P=6.3E-8	NA
chr10:6052734:C:T	IL2RA	yes	10	6052734	rs61839660	C	T	NA	NA
chr10:6576860:C:T	LINC02648	yes	10	6576860	rs7095794	C	T	NA	NA
chr10:8060309:G:A	GATA3	no	10	8060309	rs3802604	G	A	NA	NA
chr10:32451091:G:A	CCDC7	no	10	32451091	rs2490503	G	A	NA	NA
chr10:33137219:T:C	NRP1	no	10	33137219	rs722988	T	C	NA	NA
chr10:79283615:G:C	ZMIZ1	yes	10	79283615	rs1108616	G	C	CD4T: snATAC chr10.79286006.79286963 P=4.4E-39; CD8T: snATAC chr10.79286006.79286963 P=4.8E-36; NK: snATAC chr10.79286006.79286963 P=9.9E-13	NA
chr10:88287593:T:G	RNLS	yes	10	88287593	rs2018705	T	G	NA	NA
chr10:102135182:C:A	ARMH3	no	10	102135182	rs4919611	C	A	monocyte: snATAC chr10.101938812.101939583 P=2.7E-7	monocyte t3 snATAC chr10.101938812.101939583: Case > Ctrl P=3.6E-5
chr11:2160994:A:T	INS	yes	11	2160994	rs689	A	T	monocyte: snATAC chr11.2191195.2191409 P=2.4E-6	NA
chr11:35267496:C:T	SLC1A2	yes	11	35267496	rs11033048	C	T	B: snATAC chr11.35272135.35273006 P=2.8E-7; CD4T: snATAC chr11.35272135.35273006 P=1.2E-8; monocyte: snATAC chr11.35272135.35273006 P=1.1E-6; NK: snATAC chr11.35272135.35273006 P=2.9E-6	NA
chr11:47204445:T:C	PACSIN3	no	11	47204445	rs17197710	T	C	NA	NA
chr11:60961822:G:T	CD5/CD6	yes	11	60961822	rs79538630	G	T	NA	NA
chr11:61828092:C:T	FADS2	no	11	61828092	rs968567	C	T	B: snATAC chr11.61827152.61829069 P=1.7E-21; B: snATAC chr11.61814639.61817156 P=4.5E-7; B: snRNA FADS2 P=5.3E-6; B: snRNA FADS1 P=6.5E-6; CD4T: snATAC chr11.61827152.61829069 P=1.1E-34; CD4T: snATAC chr11.61833512.61833815 P=5.8E-21; CD4T: snATAC chr11.61834330.61835051 P=2.5E-13; CD4T: snATAC chr11.61814639.61817156 P=1.0E-7; CD8T: snATAC chr11.61827152.61829069 P=1.6E-22; CD8T: snATAC chr11.61…	NA
chr11:64367826:A:C	CCDC88B	no	11	64367826	rs645078	A	C	monocyte: snRNA CCDC88B P=1.3E-6	monocyte t1 snRNA CCDC88B P=2.0E-3: Case > Control
chr11:116035012:T:C	AP000997.1	no	11	116035012	rs11215766	T	C	NA	NA
chr11:128734337:G:T	FLI1	yes	11	128734337	rs605093	G	T	NA	NA
chr12:6453119:C:T	TAPBPL	yes	12	6453119	rs2041384	C	T	B: snATAC chr12.6469861.6471324 P=4.8E-9; monocyte: snATAC chr12.6469861.6471324 P=6.5E-7	NA
chr12:8942630:T:C	M6PR	no	12	8942630	rs1805731	T	C	B: snATAC cchr12.8989341.8989742 P=8.4E-8; CD4T: snATAC chr12.9063909.9065850 P=6.8E-12; CD8T: snATAC chr12.9063909.9065850 P=1.0E-7	NA
chr12:9757568:G:A	CD69	yes	12	9757568	rs4763879	G	A	monocyte: snRNA CLECL1 P=1.4E-6	NA
chr12:47814585:T:C	RPAP3	yes	12	47814585	rs11168249	T	C	NA	NA
chr12:49107615:C:T	LMBR1L	no	12	49107615	rs1274726	C	T	NA	NA
chr12:53077434:C:A	ITGB7	no	12	53077434	rs7313065	C	A	monocyte: snATAC chr12.53103896.53104165 P=1.2E-6	NA
chr12:56050848:C:T	IKZF3	yes	12	56050848	rs34415530	C	T	B: snRNA RPS26 P=8.3E-26; CD4T: snATAC chr12.56041312.56042431 P=7.8E-12; CD4T: snRNA RPS26 P=1.0E-35; CD8T: snRNA RPS26 P=9.4E-30; monocyte: snATAC chr12.56041312.56042431 P=3.1E-9; monocyte: snRNA RPS26 P=3.4E-12; NK: snRNA RPS26 P=5.0E-17	B t1 snRNA RPS26 P=7.9E-6: Case > Control; B t3 snRNA RPS26 P=9.8E-6: Case > Control; CD4T t1 snATAC chr12.56041312.56042431: Case < Control; CD4T t1 snRNA RPS26 P=5.5E-30: Case > Control; CD4T t2 snRNA RPS26 P=1.5E-42: Case > Control; CD4T t3 snRNA RPS26 P=6.6E-27: Case > Control; CD8T t1 snRNA RPS26 P=1.4E-4: Case > Control; CD8T t3 snRNA RPS26 P=1.4E-5: Case > Control; monocyte t1 snRNA RPS26 …
chr12:95767078:C:T	AMDHD1	no	12	95767078	rs17041209	C	T	NA	NA
chr12:111569952:C:T	SH2B3	yes	12	111569952	rs653178	C	T	B: snATAC chr12.110913004.110913817 P=6.6E-8; monocyte: snATAC chr12.111393690.111394149 P=1.9E-6	NA
chr13:42343795:C:T	AKAP11	yes	13	42343795	rs74537115	C	T	NA	NA
chr13:75264886:T:G	TBC1D4	no	13	75264886	rs493925	T	G	CD4T: snATAC chr13.75299966.75300520 P=4.2E-21; CD8T: snATAC chr13.75299966.75300520 P=1.0E-11	NA
chr13:99411911:G:A	GPR183	yes	13	99411911	rs4319612	G	A	NA	NA
chr14:68286876:C:T	RAD51B	no	14	68286876	rs911263	C	T	B: snATAC chr14.68293072.68293700 P=2.8E-6; CD4T: snATAC chr14.68293072.68293700 P=1.6E-6	NA
chr14:68792124:C:G	ZFP36L1	yes	14	68792124	rs927292	C	G	B: snATAC chr14.68806490.68807444 P=1.4E-8; CD8T: snATAC chr14.68795199.68796375 P=2.0E-6; monocyte: snATAC chr14.68806490.68807444 P=7.4E-15	NA
chr14:88078202:C:T	GPR65	yes	14	88078202	rs17798179	C	T	NA	NA
chr14:92637727:T:C	RIN3	no	14	92637727	rs11627032	T	C	NA	NA
chr14:98032614:A:G	AL163932.1	yes	14	98032614	rs4900384	A	G	NA	NA
chr14:100840110:T:C	MEG3	yes	14	100840110	rs56994090	T	C	NA	NA
chr15:38670555:G:T	RASGRP1	yes	15	38670555	rs1874252	G	T	NA	NA
chr15:78944951:C:T	CTSH	yes	15	78944951	rs2289702	C	T	monocyte: snRNA CTSH P=8.5E-6	NA
chr16:11097543:G:A	DEXI	yes	16	11097543	rs12928537	G	A	NA	NA
chr16:20331769:T:C	UMOD	no	16	20331769	rs4238595	T	C	NA	NA
chr16:28496748:C:T	IL27	yes	16	28496748	rs151174	C	T	monocyte: snATAC chr16.28608964.28611207 P=5.8E-8	monocyte t2 snATAC chr16.28608964.28611207 P=1.0E-3: Case > Control
chr16:28996971:G:A	TUFM	yes	16	28996971	rs141672851	G	A	NA	NA
chr16:30123335:T:C	MAPK3	yes	16	30123335	rs28529403	T	C	B: snRNA NPIPB13 P=4.9E-6	NA
chr16:30749964:CA:C	CCDC189	yes	16	30749964	rs375341506	CA	C	NA	NA
chr16:50322085:G:A	BRD7	no	16	50322085	rs7184802	G	A	B: snATAC chr16.50335111.50335831 P=1.5E-47; B: snATAC chr16.50326782.50327628 P=7.4E-17; B: snATAC chr16.50338349.50339375 P=6.0E-7; B: snRNA BRD7 P=1.1E-6; B: snRNA ADCY7 P=6.8E-6; CD4T: snATAC chr16.50335111.50335831 P=3.7E-52; CD4T: snATAC chr16.50338349.50339375 P=1.2E-41; CD4T: snATAC chr16.50326782.50327628 P=1.3E-33; CD4T: snRNA BRD7 P=1.9E-25; CD4T: snRNA ADCY7 P=2.3E-17; CD4T: snRNA TEN…	B t2 snATAC chr16.50335111.50335831 P=3.0E-5: Case > Control; CD4T t2 snATAC chr16.50335111.50335831 P=3.2E-7: Case > Control; CD8T t2 snATAC chr16.50338349.50339375 P=1.0E-4: Case > Control; CD8T t3 snRNA TENT4B P=1.8E-5: Case < Control
chr16:68070519:T:C	CDH1	yes	16	68070519	rs2285910	T	C	B: snATAC chr16.68118911.68119311 P=4.4E-13; B: snATAC chr16.68070039.68070565 P=1.2E-8	NA
chr16:75212137:G:C	BCAR1	yes	16	75212137	rs72802365	G	C	B: snATAC chr16.88745383.88745959 P=9.5E-8	NA
chr16:85982485:G:A	AC092723.1	yes	16	85982485	rs9939427	G	A	NA	NA
chr16:88923102:C:T	AC092384.1	no	16	88923102	rs477639	C	T	NA	NA
chr17:3998208:T:G	CYB5D2	no	17	3998208	rs6502764	T	G	NA	NA
chr17:7730374:C:T	AC016876.1	no	17	7730374	rs16956936	C	T	NA	NA
chr17:39374659:A:G	PLXDC1	yes	17	39374659	rs150558343	A	G	NA	NA
chr17:39910119:T:C	GSDMB	yes	17	39910119	rs56380902	T	C	B: snATAC chr17.39939528.39940371 P=3.9E-9; B: snATAC chr17.39920523.39921024 P=3.7E-8; CD4T: snATAC chr17.40602747.40603084 P=5.6E-10	B t1 snATAC chr17.39939528.39940371 P=1.3E-4: Case > Control
chr17:40623690:G:A	CCR7	yes	17	40623690	rs8066541	G	A	NA	NA
chr17:45314842:G:A	MAP3K14	no	17	45314842	rs7216796	G	A	B: snATAC chr17.45583438.45585592 P=1.2E-6; CD4T: snATAC chr17.45583438.45585592 P=5.3E-8; CD8T: snATAC chr17.45583438.45585592 P=1.1E-7	NA
chr17:45996523:A:G	MAPT	no	17	45996523	rs1052553	A	G	B: snATAC chr17.46224798.46225626 P=6.8E-27; B: snATAC chr17.45619772.45620660 P=1.0E-23; B: snATAC chr17.46290922.46291624 P=9.7E-21; B: snATAC chr17.46192524.46194373 P=4.6E-14; B: snATAC chr17.46286663.46286989 P=7.2E-14; B: snATAC chr17.45585821.45586315 P=2.4E-13; B: snATAC chr17.46194618.46194932 P=3.8E-11; B: snATAC chr17.46178890.46179677 P=2.0E-9; B: snATAC chr17.46770971.46772067 P=9.8E…	B t3 snRNA ARL17B P=4.2E-9: Case > Ctrl; B t1 snRNA KANSL1 P=1.0E-5: Case < Ctrl; CD4T t3 snATAC chr17.46192524.46194373 P=3.0E-5: Case > Ctrl; CD4T t1 snRNA ARL17B P=3.1E-9: Case > Ctrl; CD4T t3 snRNA KANSL1 P=2.0E-4: Case > Ctrl; CD8T t2 snRNA ARL17B P=3.5E-17: Case > Ctrl; CD4T t3 snRNA KANSL1 P=3.3E-5: Case > Ctrl; monocyte t2 snRNA ARL17B P=2.4E-6: Case > Ctrl; NK t3 snATAC chr17.46192524.46…
chr17:47956725:A:G	PRR15L	no	17	47956725	rs2597169	A	G	B: snATAC chr17.48023385.48025467 P=2.6E-6; CD4T: snATAC chr17.48011392.48012716 P=6.1E-8	NA
chr18:12818923:G:A	PTPN2	yes	18	12818923	rs80262450	G	A	NA	NA
chr18:48930726:T:C	SMAD7	no	18	48930726	rs12456328	T	C	NA	NA
chr18:69869260:C:T	CD226	yes	18	69869260	rs12969657	C	T	NA	NA
chr19:10317045:T:A	TYK2	yes	19	10317045	rs74956615	T	A	NA	NA
chr19:18407968:C:T	LRRC25	yes	19	18407968	rs10424080	C	T	B: snATAC chr19.18401618.18402074 P=1.5E-15	NA
chr19:46705224:T:C	PRDK2	yes	19	46705224	rs425105	T	C	NA	NA
chr19:48703417:G:A	FUT2	yes	19	48703417	rs601338	G	A	NA	NA
chr20:1634898:T:C	SIRPG	yes	20	1634898	rs6043405	T	C	CD4T: snATAC chr20.1587930.1588934 P=4.0E-8; CD8T: snATAC chr20.1587930.1588934 P=2.8E-7; monocyte: snATAC chr20.1587930.1588934 P=1.1E-9	NA
chr20:35166801:G:T	PROCR	no	20	35166801	rs6088747	G	T	NA	NA
chr21:42416077:G:A	UBASH3A	yes	21	42416077	rs11203203	G	A	monocyte: snATAC chr21.42414655.42415640 P=9.5E-8	NA
chr21:44204668:C:T	ICOSLG	yes	21	44204668	rs56178904	C	T	NA	NA
chr22:30055497:C:T	ASCC2/LIF	yes	22	30055497	rs193477	C	T	B: snATAC chr22.30195769.30197014 P=4.6E-12; CD4T: snATAC chr22.30195769.30197014 P=6.7E-21; NK: snATAC chr22.30195769.30197014 P=9.4E-31; NK: snATAC chr22.30193118.30193336 P=3.6E-11	NA
chr22:37189696:T:C	C1QTNF6	yes	22	37189696	rs229531	T	C	CD8T: snATAC chr22.37282029.37282566 P=1.7E-7	NA
chr6:32636595:G :A	HLA-DQB1	no	6	32636595	rs9272346	G	A	B: snATAC chr6.32689558.32689806 P=1.2E-13; B: snATAC chr6.32668089.32668628 P=2.0E-10; CD4T: snATAC chr6.32668089.32668628 P=4.9E-25; CD4T: snATAC chr6.32609420.32610462 P=2.9E-12; CD4T: snATAC chr6.32588886.32590373 P=8.3E-7; CD8T: snATAC chr6.32668089.32668628 P=9.7E-30; CD8T: snATAC chr6.32588886.32590373 P=8.6E-17; CD8T: snATAC chr6.32666197.32666842 P=8.0E-7; monocyte: snATAC chr6.32668089.…	NA

## Sheet: Supplementary Table 4
GENE	TIMEPOINT	CELL LINEAGE	EFFECT (Red = upregulated in cases; green = upregulated in controls)	FDR
NFKB1	1	B Cells	0.853393	0
NFKB1	2	Monocyte	0.898239	2.0125e-178
BACH2	2	CD8 T Cells	1.12515	1.4548e-129
NR4A3	1	B Cells	0.767656	3.97937e-110
AFF3	1	B Cells	0.881882	3.788e-108
BACH2	3	B Cells	1.09819	4.74195e-94
NFKB1	1	CD4 T Cells	0.898719	5.53421e-93
IFIH1	2	NK Cells	0.659318	5.71826e-91
NFKB1	2	B Cells	0.92324	2.21482e-85
BACH2	1	B Cells	0.939154	2.57521e-77
BACH2	3	CD4 T Cells	1.07144	4.06424e-76
IFIH1	1	NK Cells	0.650195	1.01351e-72
RGS1	2	Monocyte	0.774416	3.37526e-67
CD69	1	B Cells	0.881482	1.57196e-62
RHOH	1	B Cells	0.878026	1.89146e-62
STAT4	3	NK Cells	1.13119	3.39022e-60
STAT4	2	Monocyte	0.787111	7.77657e-57
BACH2	2	B Cells	1.06456	9.8331e-55
JAZF1	2	CD8 T Cells	0.660968	2.51891e-49
NFKB1	1	Monocyte	0.93036	2.49459e-47
TNFAIP3	1	Monocyte	0.836954	2.06395e-46
HLA-DQB1	2	Monocyte	1.42182	3.04068e-44
CD69	3	NK Cells	1.12464	2.74917e-40
DENND1B	1	Monocyte	1.14323	9.69304e-37
TNFAIP3	2	Monocyte	0.8774	1.95421e-36
FYN	1	NK Cells	1.09758	1.11242e-34
TNFAIP3	1	B Cells	0.853863	4.53947e-34
THEMIS	1	CD8 T Cells	0.800418	1.43665e-30
BACH2	2	CD4 T Cells	1.04161	4.99352e-30
IFIH1	3	NK Cells	1.26942	2.12234e-28
FYN	1	CD4 T Cells	1.0491	7.86053e-29
JAZF1	3	B Cells	1.19587	2.15411e-27
AHI1	1	CD4 T Cells	1.23272	4.81597e-27
CD226	2	Monocyte	1.32033	4.11674e-26
HLA-DQB1	2	B Cells	1.19305	3.65704e-25
STAT4	3	CD4 T Cells	1.08251	1.91882e-24
TOX	2	CD8 T Cells	0.803685	1.59613e-24
NR4A3	2	Monocyte	0.888678	1.34896e-24
DENND1B	1	B Cells	1.17661	4.27075e-24
AFF3	2	B Cells	1.07308	8.67537e-24
STAT4	2	B Cells	0.848873	9.66234e-24
NFKB1	3	CD4 T Cells	0.951296	1.15409e-22
CD69	1	NK Cells	0.88699	1.59857e-21
AFF3	1	CD4 T Cells	0.850692	7.9557e-22
NFKB1	2	CD4 T Cells	0.953377	1.91012e-21
TNFAIP3	2	B Cells	0.866305	1.05997e-21
HLA-DQB1	1	B Cells	1.13693	1.57651e-21
NFKB1	1	CD8 T Cells	0.93407	1.20911e-20
NFKB1	2	NK Cells	0.93831	4.91838e-20
CD6	1	CD4 T Cells	1.09239	1.70855e-20
ZMIZ1	1	Monocyte	1.12119	1.13819e-20
SKI	3	CD8 T Cells	1.11981	6.08212e-20
NR4A3	2	B Cells	0.875028	1.03119e-19
STAT4	2	CD8 T Cells	0.923786	1.12646e-19
TOX	1	CD4 T Cells	0.917945	9.39619e-19
THEMIS	1	CD4 T Cells	0.871583	1.00037e-18
AFF3	1	Monocyte	0.781671	5.93154e-19
SKI	2	CD4 T Cells	0.916615	2.6008e-18
SKAP2	2	Monocyte	1.35829	4.4378e-18
RHOH	2	CD4 T Cells	0.934426	4.73036e-17
JAZF1	3	NK Cells	1.1886	2.1928e-16
JAZF1	2	Monocyte	1.14461	3.84451e-17
SKI	3	NK Cells	0.8893	2.79833e-16
JAZF1	3	Monocyte	1.14585	3.67717e-16
SKI	3	Monocyte	0.913938	4.89294e-16
TRAF1	1	Monocyte	0.752064	3.95347e-16
RHOH	2	Monocyte	0.786831	1.13958e-15
RAD51B	1	NK Cells	0.786003	7.61658e-15
RGS1	3	Monocyte	0.887096	1.13931e-14
GLIS3	1	Monocyte	1.3384	1.41258e-14
RHOH	1	CD8 T Cells	0.909942	1.40152e-13
HLA-DQB1	3	Monocyte	1.19266	4.79495e-14
RASGRP1	3	NK Cells	1.18895	4.08048e-13
FYN	2	CD8 T Cells	0.95563	1.68875e-13
ZMIZ1	3	Monocyte	0.927456	1.15644e-12
CD69	2	NK Cells	0.927401	3.0853e-11
NR4A3	3	Monocyte	1.08213	6.19835e-12
STAT4	1	Monocyte	0.867013	6.12108e-12
ADCY3	1	Monocyte	0.777783	6.85386e-12
PTGER4	2	Monocyte	0.856471	5.32861e-12
IL2RA	1	B Cells	0.669562	1.21371e-11
RAD51B	2	CD8 T Cells	1.16679	2.35372e-11
HLA-DQB1	1	Monocyte	1.23145	1.85877e-11
IFIH1	2	B Cells	0.836548	4.33857e-11
BACH2	3	NK Cells	1.06596	1.28261e-10
RHOH	3	CD8 T Cells	0.933137	1.9796e-10
CD69	3	B Cells	1.06449	2.90476e-10
CTSB	1	Monocyte	0.864891	8.59901e-11
CCDC7	1	CD4 T Cells	0.817494	1.86419e-10
SKAP2	1	Monocyte	0.758473	1.16449e-10
FYN	3	CD8 T Cells	1.0391	4.83755e-10
STAT4	1	B Cells	0.905274	1.77812e-10
TRAF1	3	NK Cells	1.3593	7.31993e-10
IKZF3	2	B Cells	1.11411	9.12525e-10
IKZF1	2	CD4 T Cells	1.06168	1.52062e-09
IFIH1	2	Monocyte	0.849692	4.09194e-10
SKI	1	B Cells	0.88574	6.11222e-10
CD226	1	Monocyte	1.18866	1.2472e-09
CD226	3	Monocyte	0.83393	1.70883e-09
CD47	1	B Cells	1.10418	2.20069e-09
TRAF1	2	NK Cells	0.721578	1.21615e-08
JAZF1	3	CD4 T Cells	1.1784	8.50428e-09
CTSB	3	Monocyte	1.13188	5.70368e-09
TOX	1	NK Cells	0.858994	3.34231e-08
NFKB1	2	CD8 T Cells	1.04063	1.90059e-08
CCR7	2	CD8 T Cells	1.17427	2.11403e-08
STAT4	2	CD4 T Cells	0.951987	3.61384e-08
DENND1B	2	CD8 T Cells	0.893314	2.40706e-08
PTPN22	2	CD8 T Cells	0.895744	2.62251e-08
TNFAIP3	3	CD8 T Cells	1.0434	5.65199e-08
STAT4	2	NK Cells	0.952197	1.21989e-07
SLAMF7	3	B Cells	1.44924	8.09478e-08
CD6	3	NK Cells	0.872713	1.71603e-07
NR4A3	1	Monocyte	0.927366	4.44747e-08
RBPJ	1	NK Cells	1.15567	1.56419e-07
BACH2	3	Monocyte	1.13738	6.67929e-08
RAD51B	1	Monocyte	0.830537	5.98995e-08
CD226	2	CD8 T Cells	0.756148	1.08044e-07
IFIH1	1	B Cells	0.871064	7.2107e-08
CD6	2	CD8 T Cells	1.07916	1.16988e-07
CD6	1	CD8 T Cells	1.08078	3.23287e-07
RIN3	2	CD8 T Cells	0.795894	1.46834e-07
GPR183	1	Monocyte	1.08497	9.0929e-08
RIN3	2	Monocyte	0.933614	9.04485e-08
SKAP2	3	B Cells	1.28163	3.86162e-07
IRF4	1	Monocyte	0.843378	1.31585e-07
FARP2	3	Monocyte	0.906149	1.916e-07
SKI	2	NK Cells	0.921678	7.50711e-07
IFIH1	1	Monocyte	0.835574	1.77959e-07
CCR7	2	CD4 T Cells	1.11586	5.77089e-07
PVT1	2	Monocyte	1.23954	1.87127e-07
KLF3	1	B Cells	1.14797	2.59698e-07
NFKB1	1	NK Cells	0.957765	8.69829e-07
RHOH	1	CD4 T Cells	0.95262	5.37281e-07
IFIH1	3	Monocyte	1.13629	4.27201e-07
STAT4	3	CD8 T Cells	1.04548	9.81283e-07
FLI1	2	CD8 T Cells	0.859292	7.01717e-07
RAD51B	3	CD8 T Cells	0.891555	1.24086e-06
UBE2E3	2	CD8 T Cells	0.882801	9.54548e-07
CCDC7	1	CD8 T Cells	0.772361	2.37164e-06
RASGRP1	2	CD8 T Cells	0.893231	1.02826e-06
FYN	1	CD8 T Cells	1.03449	3.57792e-06
DENND1B	1	CD8 T Cells	1.10425	3.96664e-06
KLF3	2	B Cells	1.17437	2.05495e-06
THEMIS	1	NK Cells	0.635182	3.18951e-06
SKAP2	1	B Cells	0.829769	1.28745e-06
PTGER4	2	CD8 T Cells	1.12087	2.03936e-06
CCDC7	2	CD8 T Cells	1.28262	2.06171e-06
CCDC7	1	NK Cells	0.667688	4.04954e-06
IL7R	2	CD8 T Cells	1.11653	2.9365e-06
CD6	1	NK Cells	1.17555	5.34799e-06
TAGAP	1	Monocyte	0.894476	2.29625e-06
CMTM7	2	CD4 T Cells	1.16403	6.52462e-06
SKI	1	NK Cells	1.09228	6.78368e-06
SLAMF7	1	Monocyte	0.745197	3.22453e-06
FCMR	2	CD4 T Cells	1.26208	9.41028e-06
ARMH3	1	Monocyte	0.880608	4.15643e-06
BACH2	1	CD4 T Cells	0.981945	7.28509e-06
IL6R	1	CD4 T Cells	0.718828	7.33046e-06
NOTCH2	2	Monocyte	1.05581	4.06814e-06
AL163932.1	2	CD8 T Cells	1.29758	7.71878e-06
KLF3	3	CD8 T Cells	1.11664	1.12204e-05
RASGRP1	1	CD4 T Cells	0.942298	8.85179e-06
BCL2L11	3	CD4 T Cells	0.878391	1.96223e-05
UBE2E3	1	NK Cells	1.12289	2.18384e-05
RAD51B	2	Monocyte	1.13176	8.49105e-06
RAD51B	3	CD4 T Cells	0.929419	3.10153e-05
AFF3	2	CD8 T Cells	1.29389	1.72471e-05
RHOH	1	NK Cells	0.904351	3.87022e-05
NFKB1	3	B Cells	1.02191	4.31369e-05
SKAP2	2	B Cells	1.22558	3.0821e-05
CD69	3	CD8 T Cells	1.04739	4.15485e-05
NFKB1	3	NK Cells	1.0307	6.29137e-05
FARP2	1	Monocyte	1.10885	2.05358e-05
BACH2	2	NK Cells	0.956016	0.000108958
CD6	2	B Cells	0.747733	4.96057e-05
NR5A2	2	Monocyte	2.15582	2.4114e-05
NOTCH2	1	Monocyte	1.06551	2.8179e-05
KLF3	3	Monocyte	1.13642	4.1568e-05
CD47	2	CD4 T Cells	1.08944	9.09125e-05
DENND1B	3	CD4 T Cells	0.940293	0.000115049
AFF3	3	Monocyte	1.10609	6.05709e-05
AFF3	3	CD4 T Cells	0.915103	0.000139212
PTPN22	1	B Cells	0.876799	5.74116e-05
CD6	2	NK Cells	1.12284	0.000253458
NRP1	2	Monocyte	0.902009	5.68398e-05
RASGRP1	1	CD8 T Cells	0.912778	0.000218497
LEKR1	3	Monocyte	0.738353	9.19015e-05
ADCY3	1	B Cells	1.12805	7.9572e-05
MTMR9	3	Monocyte	0.86915	0.000103501
RAD51B	3	B Cells	0.91649	0.00025109
TOX	3	CD4 T Cells	0.946536	0.000245843
RNLS	1	CD4 T Cells	0.784991	0.000170354
RPAP2	1	NK Cells	1.14667	0.000325721
PVT1	1	B Cells	1.11649	0.000155839
PVT1	2	CD8 T Cells	1.19543	0.000257554
MAP3K14	3	Monocyte	1.14298	0.000220556
RAD51B	2	CD4 T Cells	1.06586	0.000403023
ITGB7	1	NK Cells	0.6619	0.000509558
STAT4	1	CD8 T Cells	0.960201	0.000704183
CD226	2	CD4 T Cells	1.17558	0.000499344
CCR7	1	B Cells	0.928335	0.000244172
CCR7	2	Monocyte	1.20272	0.000200875
ZFP36L1	1	B Cells	0.93558	0.000260255
ADCY3	2	B Cells	1.13031	0.000427139
AHI1	3	Monocyte	1.08878	0.000307473
FYN	3	NK Cells	0.97315	0.000785511
TBC1D4	3	B Cells	0.44702	0.000791939
SKAP2	3	Monocyte	0.863748	0.000400884
CD47	2	B Cells	1.07555	0.000569928
GPR65	2	Monocyte	0.777222	0.000283892
AFF3	1	CD8 T Cells	0.825363	0.00104404
TOX	3	NK Cells	1.10518	0.000919004
RGS1	1	B Cells	0.919089	0.000384668
CCDC7	3	CD4 T Cells	0.878575	0.000975519
NR4A3	1	NK Cells	0.906296	0.00101278
RGS1	1	NK Cells	0.876053	0.00104887
SKAP2	3	CD8 T Cells	0.645652	0.000892911
RAD51B	1	CD4 T Cells	0.941733	0.000710298
PVT1	3	CD4 T Cells	1.09754	0.00124624
TOX	1	CD8 T Cells	0.924943	0.00164112
PTGER4	1	CD8 T Cells	1.0973	0.00174244
RAD51B	3	Monocyte	0.901759	0.000757347
NR4A3	3	B Cells	0.937628	0.00168836
STAT4	1	NK Cells	1.04197	0.00158848
IKZF1	2	CD8 T Cells	1.06916	0.00102106
KLF3	2	CD4 T Cells	1.0685	0.0015387
CCR7	3	B Cells	1.08844	0.00186771
ZFP36L1	3	Monocyte	1.07956	0.000948785
BCL2L11	2	Monocyte	0.930765	0.00074051
PTGER4	2	CD4 T Cells	1.06208	0.00174062
NOTCH2	2	B Cells	1.11944	0.00142426
PTPN2	1	NK Cells	1.08334	0.00191642
CMTM7	3	CD4 T Cells	1.13317	0.00217972
IKZF1	1	Monocyte	0.883721	0.000990759
NR4A3	1	CD4 T Cells	0.931637	0.0014848
SKI	2	Monocyte	0.955664	0.000904162
SKI	2	B Cells	0.927241	0.00177641
ZFP36L1	2	B Cells	0.925268	0.00180254
AHI1	3	B Cells	1.08814	0.00259284
SMAD7	3	NK Cells	0.922642	0.00281034
NR5A2	3	Monocyte	1.72811	0.00136338
RBPJ	1	CD4 T Cells	1.04984	0.0016769
RPAP2	1	CD4 T Cells	1.07537	0.00172138
AKAP11	2	B Cells	1.14749	0.00204941
CD101	1	CD4 T Cells	0.381723	0.00220998
SLAMF7	3	NK Cells	1.20699	0.00381593
ZMIZ1	1	B Cells	0.854406	0.00164852
CPE	2	CD4 T Cells	0.413877	0.00317827
GATA3	1	NK Cells	1.15659	0.00353053
IFIH1	3	CD4 T Cells	1.08764	0.00374371
SKI	1	Monocyte	0.946858	0.00184994
SH2B3	1	Monocyte	0.93501	0.00201098
ADCY3	3	B Cells	1.11744	0.00454036
SLAMF7	2	CD8 T Cells	0.672489	0.00283683
RBPJ	1	CD8 T Cells	1.0692	0.0054193
AHI1	1	B Cells	1.06582	0.00218655
AHI1	2	B Cells	1.06909	0.003688
CPE	1	B Cells	0.363128	0.00253686
IKZF1	3	B Cells	1.08379	0.00558708
UBE2E3	1	CD4 T Cells	0.943435	0.00356995
KLF3	3	NK Cells	1.13409	0.0063881
KLF3	2	CD8 T Cells	1.0893	0.00368142
TAGAP	1	CD4 T Cells	0.919585	0.00377956
IRF4	2	Monocyte	0.911621	0.00292005
KLF3	3	CD4 T Cells	1.06548	0.00710884
PTPN22	2	Monocyte	1.15529	0.00301339
JAZF1	2	B Cells	1.05387	0.00525527
IFIH1	3	CD8 T Cells	1.13655	0.00610989
IKZF3	3	CD8 T Cells	0.926652	0.0070244
LMBR1L	1	Monocyte	0.791477	0.00418794
IKZF3	1	CD4 T Cells	1.06136	0.00565642
SMAD7	3	CD8 T Cells	1.08253	0.00729611
CCR5	1	Monocyte	0.541673	0.00431977
IKZF3	3	CD4 T Cells	0.93711	0.0090524
IL6R	2	CD4 T Cells	1.25115	0.0079782
SMAD7	3	Monocyte	0.918553	0.00525271
SMAD7	3	B Cells	0.905168	0.00987908
CD69	2	Monocyte	0.93909	0.00417229
PVT1	1	CD8 T Cells	0.860849	0.0117564
TOX	2	NK Cells	1.08884	0.0143848
FYN	2	CD4 T Cells	0.98606	0.00906676
SKI	1	CD4 T Cells	1.03806	0.00713258
CD69	2	CD8 T Cells	1.03953	0.00811646
SMAD7	1	B Cells	1.08619	0.00628207
SLAMF7	1	NK Cells	0.821599	0.0123698
TNFAIP3	3	NK Cells	0.972873	0.0138296
SKI	3	CD4 T Cells	0.966251	0.0129763
ZFP36L1	1	NK Cells	0.89146	0.0128833
GLIS3	2	Monocyte	1.12228	0.00599321
THEMIS	2	NK Cells	0.805311	0.0192656
GATA3	1	CD4 T Cells	1.09766	0.0095803
TNFAIP3	3	B Cells	1.05697	0.0151522
SMAD7	1	CD8 T Cells	1.09776	0.0173884
THEMIS	3	CD4 T Cells	1.0681	0.0164236
RAD51B	2	B Cells	1.06679	0.0122426
AFF3	2	Monocyte	1.0858	0.00736208
TBC1D4	1	Monocyte	0.836954	0.00874609
DENND1B	2	B Cells	1.05568	0.0125816
BCL2L11	3	NK Cells	0.891849	0.0182544
NOTCH2	1	B Cells	0.918393	0.00894408
RHOH	2	CD8 T Cells	1.03737	0.0120329
FLI1	1	Monocyte	0.898684	0.00975171
CTSH	2	B Cells	1.20359	0.0142856
UBASH3A	1	B Cells	0.377094	0.00993906
UBASH3A	2	CD8 T Cells	1.2257	0.0132331
STAT4	1	CD4 T Cells	0.969819	0.0142883
CD69	1	Monocyte	0.930073	0.0113513
GSDMB	2	CD4 T Cells	1.32718	0.0190318
NR4A3	2	CD4 T Cells	0.951623	0.0193633
IKZF1	1	CD8 T Cells	1.05226	0.0262443
RAD51B	2	NK Cells	1.09658	0.0318177
BACH2	1	NK Cells	1.03721	0.0234065
AFF3	1	NK Cells	1.21556	0.0240586
IKZF1	1	CD4 T Cells	1.02666	0.017697
NR4A3	3	NK Cells	0.93822	0.0272887
FLI1	3	Monocyte	1.08944	0.0163454
RNLS	2	CD4 T Cells	1.19524	0.0227456
DARS	1	B Cells	0.923319	0.013965
UBE2E3	2	Monocyte	1.04216	0.012842
CD69	2	CD4 T Cells	0.976278	0.0241339
BCL2L11	3	Monocyte	1.05774	0.01782
ASCC2	1	Monocyte	0.872565	0.0157336
JAZF1	3	CD8 T Cells	0.920692	0.0246705
TRAF1	3	Monocyte	1.08483	0.0181716
SKAP2	1	CD4 T Cells	0.745603	0.0204284
DEXI	3	CD8 T Cells	2.35777	0.025272
IL7R	1	CD8 T Cells	1.059	0.0359974
MTMR9	2	NK Cells	1.16425	0.0417662
GPR65	1	NK Cells	0.808502	0.0305737
IFIH1	1	CD4 T Cells	0.914641	0.0217977
MAPT	1	NK Cells	0.3751	0.0315466
RBPJ	3	NK Cells	0.936911	0.0345351
CCR7	1	CD4 T Cells	0.948725	0.0234337
SLAMF7	1	B Cells	1.22282	0.0197948
CDH1	1	Monocyte	0.710367	0.021606
CD69	2	B Cells	0.972104	0.0286874
SH2B3	2	B Cells	0.938151	0.0294478
TRAF1	2	Monocyte	0.917896	0.019157
IKZF1	3	CD4 T Cells	1.02919	0.0399664
DARS	3	NK Cells	1.20405	0.0447444
DARS	2	CD4 T Cells	1.09273	0.037007
FCMR	2	B Cells	1.21356	0.0327783
AL163932.1	2	CD4 T Cells	1.30155	0.0381391
ADCY3	2	Monocyte	0.915149	0.0218655
TNFAIP3	2	CD8 T Cells	1.02383	0.0327283
CD6	3	CD4 T Cells	1.03049	0.0467952
CD47	3	CD4 T Cells	1.05738	0.0491364
PVT1	2	CD4 T Cells	1.07193	0.0430026
GPR183	3	NK Cells	1.11797	0.0525102
RIN3	2	B Cells	1.11357	0.0387265
TUFM	2	Monocyte	1.21534	0.025523
ADCY3	1	NK Cells	1.27221	0.0509169
LIF	2	Monocyte	1.30018	0.0258789
SMAD7	2	NK Cells	1.06773	0.06827
COBL	1	CD4 T Cells	0.84405	0.0391073
ANKRD55	1	CD4 T Cells	0.743746	0.0394312
ZMIZ1	2	B Cells	0.876711	0.0424304
PTPN2	3	B Cells	0.958271	0.0575307
DENND1B	2	CD4 T Cells	0.963643	0.0494167
CCDC88B	1	Monocyte	0.862829	0.0357285
RASGRP1	3	CD4 T Cells	1.04023	0.0615665
NR4A3	3	CD8 T Cells	1.05653	0.0560706
MTMR9	2	Monocyte	1.09624	0.0342268
RASGRP1	1	Monocyte	0.749806	0.0402077
SH2B3	1	B Cells	0.951165	0.0372075
CD69	1	CD4 T Cells	0.978288	0.0485752
ARMH3	2	CD8 T Cells	0.918338	0.0503276
SLAMF7	1	CD8 T Cells	0.742089	0.0803306
NOTCH2	3	B Cells	1.09054	0.0704017
GPR183	1	B Cells	1.06935	0.0404144
LEKR1	2	Monocyte	0.818438	0.0389762
RPAP2	2	CD8 T Cells	0.93241	0.0541159
IKZF3	1	CD8 T Cells	0.937725	0.0867741
JAZF1	1	NK Cells	0.938947	0.0756735
ZFP36L1	3	CD8 T Cells	1.07364	0.0687084
RASGRP1	1	B Cells	1.04208	0.0451271
GPR183	3	B Cells	1.08082	0.0828439
PTPN2	2	B Cells	0.963572	0.0647685
CD47	2	CD8 T Cells	0.923006	0.0610697
MTMR9	1	B Cells	1.06865	0.0501763
JAZF1	1	Monocyte	0.948857	0.0556606
TNFAIP3	1	CD4 T Cells	1.01594	0.0645815
PLXDC1	1	CD4 T Cells	0.858207	0.0653071
RIN3	2	CD4 T Cells	1.0884	0.0793255
IL2RA	3	NK Cells	1.32566	0.097226
SKI	3	B Cells	0.94565	0.0954648
IL2RA	3	CD4 T Cells	1.12113	0.0948742
IFIH1	2	CD8 T Cells	0.895198	0.0726422
SH2B3	1	CD4 T Cells	0.910944	0.0707769
SKAP2	2	CD8 T Cells	1.43788	0.0727086
ICOSLG	3	B Cells	0.917803	0.0992386
GPR65	2	CD8 T Cells	0.749172	0.0737723
TYK2	2	CD8 T Cells	0.838088	0.0743039
THEMIS	2	CD8 T Cells	0.946804	0.07795
UBASH3A	1	CD4 T Cells	0.900917	0.0753293
RBPJ	2	CD4 T Cells	0.967149	0.091457
KLF3	1	CD4 T Cells	1.0445	0.0766333
PLGRKT	3	CD8 T Cells	0.813182	0.0945721
GATA3	2	CD8 T Cells	0.89039	0.081614
IL7R	3	CD8 T Cells	0.946736	0.0982438
CCR7	1	Monocyte	1.15269	0.0715221
FLI1	1	B Cells	0.9521	0.0711439
FARP2	2	B Cells	0.95711	0.0999444
PLGRKT	1	B Cells	0.853321	0.0745648
SMAD7	1	CD4 T Cells	1.05958	0.0935032
TATDN3	1	Monocyte	0.82253	0.0826975
BACH2	2	Monocyte	1.05617	0.0728213
BCL2L11	1	Monocyte	1.06445	0.0899361
AHI1	2	Monocyte	0.950112	0.0872953
DARS	2	Monocyte	1.11155	0.0908395
RSPO3	1	B Cells	0	0.099297

## Sheet: Supplementary Table 5
	candidate locus/snATAC peak coordinates			snATAC peak case-control association characteristics and linked genes
T1D LOCUS	Chr	Start	End	Timepoint	Lineage	Effect	P-value	Linked gene
SKI	1	2475976	2675976
	1	2554833	2556780	2	Monocyte	0.917986	3.9267e-05	TNFRSF14
PGM1	1	63543100	63743100
	1	63651026	63651740	1	CD4 T Cells	0.770896	3.4999e-06	NA
PTPN22	1	113734946	113934946
	1	113758057	113760102	1	Monocyte	1.10365	0.00014626	PHTF1
	1	113758057	113760102	1	Monocyte	1.10365	0.00014626	HIPK1
	1	113758057	113760102	1	Monocyte	1.10365	0.00014626	RSBN1
	1	113928731	113931070	2	CD8 T Cells	1.06456	0.00097203	HIPK1
IL6R	1	154365420	154565420
	1	154386190	154387285	1	B Cells	1.41097	9.9903e-05	NA
	1	154464914	154465338	1	CD4 T Cells	0.811189	2.7999e-05	NA
RGS1	1	192470207	192670207
	1	192545892	192546503	2	CD8 T Cells	0.567168	0.00055217	NA
	1	192580304	192581417	2	Monocyte	0.755247	5.6781e-07	RGS1
NR5A2	1	199993261	200193261
	1	200129091	200129887	2	CD8 T Cells	0.739761	8.6397e-05	NA
	1	200153945	200154586	2	CD8 T Cells	0.764101	4.1927e-05	NA
DDX59	1	200763456	200963456
	1	200880318	200880563	2	CD8 T Cells	0.503803	9.1908e-05	NA
FCMR	1	206669068	206869068
	1	206714663	206714994	2	CD8 T Cells	0.759594	0.00035866	CD55
	1	206737077	206737441	1	CD4 T Cells	0.852558	0.00036156	CD55
	1	206744749	206745551	1	Monocyte	1.24714	0.00030224	NA
AC096559.1	2	12412805	12612805
	2	12479001	12479510	2	Monocyte	1.32106	0.00072757	NA
ADCY3	2	24774775	24974775
	2	24919044	24920760	1	CD4 T Cells	0.905358	0.000386	NA
	2	24926317	24927221	1	CD4 T Cells	1.3307	0.00023845	NA
AC007381.1	2	60279872	60479872
	2	60446377	60447275	3	Monocyte	0.790059	0.00017465	BCL11A
	2	60446377	60447275	3	Monocyte	0.790059	0.00017465	REL
	2	60465756	60466049	1	Monocyte	1.64866	1.073e-05	NA
BCL2L11	2	110758727	110958727
	2	110846403	110847431	1	B Cells	0.790975	0.00010764	NA
	2	110874971	110875370	1	B Cells	1.3404	3.0785e-05	BCL2L11
DARS	2	136070750	136270750
	2	136214190	136214770	2	Monocyte	0.886204	0.00012642	MCM6
	2	136238182	136239493	1	CD4 T Cells	1.15591	0.00033059	MCM6
	2	136389841	136390313	2	CD8 T Cells	0.495633	0.00032628	CXCR4
UBE2E3	2	181009527	181209527
	2	181145737	181146605	2	CD8 T Cells	0.765021	0.0010075	ITGA4
STAT4	2	191005394	191205394
	2	191127955	191128745	2	CD8 T Cells	0.653731	7.5822e-07	STAT4
	2	191204398	191204785	2	Monocyte	0.621799	0.00062858	NA
CTLA4	2	203774196	203974196
	2	203781805	203782603	2	Monocyte	1.14265	0.00025494	RAPH1
FARP2	2	241368331	241568331
	2	241540577	241541765	1	B Cells	0.867318	0.0001665	NA
CMTM7	3	32315706	32515706
	3	32469719	32470070	2	Monocyte	1.31851	0.00070191	NA
CD47	3	108279790	108479790
	3	108388148	108388856	1	B Cells	0.75048	1.3837e-05	NA
TIMMDC1	3	119460301	119660301
	3	119628513	119629292	2	Monocyte	0.811067	3.3133e-06	CD80
	3	119628513	119629292	2	Monocyte	0.811067	3.3133e-06	ARHGAP31
LEKR1	3	156879308	157079308
	3	157029103	157029836	1	B Cells	1.12418	0.0002517	NA
CHRD	3	184284608	184484608
	3	184459365	184459622	1	Monocyte	2.0905	9.4547e-11	NA
	3	184459365	184459622	2	Monocyte	1.80453	1.8108e-08	NA
	3	184459365	184459622	3	Monocyte	1.4899	0.00011183	NA
TMEM175	4	873543	1073543
	4	1043445	1043915	2	Monocyte	1.08324	0.0009262	PCGF3
	4	1043445	1043915	2	Monocyte	1.08324	0.0009262	ZNF721
	4	1043445	1043915	2	Monocyte	1.08324	0.0009262	ZNF718
	4	1043445	1043915	2	Monocyte	1.08324	0.0009262	SLBP
	4	1043445	1043915	2	Monocyte	1.08324	0.0009262	ZNF141
	4	1043445	1043915	2	Monocyte	1.08324	0.0009262	NELFA
	4	1043445	1043915	2	Monocyte	1.08324	0.0009262	TACC3
RBPJ	4	25983858	26183858
	4	26061312	26061512	1	Monocyte	0.701191	0.00043016	NA
	4	26150707	26151256	2	Monocyte	1.30344	1.196e-05	NA
KLF3	4	38502849	38702849
	4	38529056	38530134	1	B Cells	0.812756	0.00063586	TMEM156
	4	38529056	38530134	1	B Cells	0.812756	0.00063586	RPL9
	4	38529056	38530134	1	B Cells	0.812756	0.00063586	RFC1
RHOH	4	40112934	40312934
	4	40283361	40284372	1	CD4 T Cells	1.13329	4.7113e-05	RHOH
	4	40283361	40284372	3	CD4 T Cells	1.12569	0.0001076	RHOH
	4	40283361	40284372	3	NK Cells	0.642135	1.7299e-05	RHOH
IL7R	5	35788101	35988101
	5	35815612	35815825	2	Monocyte	0.568083	0.00094543	NA
	5	35853538	35854659	2	B Cells	0.715484	2.7235e-06	IL7R
	5	35869711	35870210	1	B Cells	0.695028	0.00011408	NA
PTGER4	5	40421603	40621603
	5	40437340	40437859	2	Monocyte	0.886055	0.00054624	NA
ANKRD55	5	56046422	56246422
	5	56155970	56156898	2	Monocyte	0.869283	4.9244e-06	NA
IRF4	6	324915	524915
	6	340995	341481	2	Monocyte	1.1696	3.2225e-07	EXOC2
	6	446340	447500	1	CD8 T Cells	0.865986	1.3645e-05	NA
HLA-DQB1	6	32564659	32764659
	6	32586002	32586587	1	B Cells	1.27539	0.00067024	NA
	6	32586002	32586587	3	B Cells	1.46045	5.3201e-06	NA
	6	32586002	32586587	3	Monocyte	1.33559	5.3544e-06	NA
	6	32659618	32660169	1	B Cells	0.787668	1.0764e-05	HLA-DPB1
	6	32664773	32665186	1	B Cells	0.723413	2.3937e-09	RPS18
	6	32664773	32665186	1	Monocyte	0.838146	0.00034606	RPS18
	6	32664773	32665186	2	Monocyte	0.839961	2.9838e-05	RPS18
	6	32664773	32665186	3	Monocyte	0.802573	2.4679e-08	RPS18
	6	32679357	32680348	3	B Cells	1.51635	5.2011e-06	NA
	6	32679357	32680348	3	Monocyte	1.40396	1.4208e-05	NA
	6	32691888	32692283	3	Monocyte	1.82129	0.0004011	NA
DEF6	6	35292400	35492400
	6	35393900	35394306	3	CD8 T Cells	1.79179	0.00016051	NA
BACH2	6	90167049	90367049
	6	90303113	90303460	1	B Cells	2.1324	0.00032162	NA
	6	90347533	90347983	2	Monocyte	1.19707	0.00129676	NA
TNFAIP3	6	137582468	137782468
	6	137588544	137589839	2	CD8 T Cells	0.726133	0.00014511	TNFAIP3
	6	137736237	137736699	1	B Cells	0.754275	0.00050463	NA
TAGAP	6	158949210	159149210
	6	159038877	159039596	2	Monocyte	0.919138	0.00054921	TAGAP
ABCB5	7	20457306	20657306
	7	20596706	20596974	2	Monocyte	1.28972	0.00051086	ITGB8
SKAP2	7	26752706	26952706
	7	26912296	26912657	3	Monocyte	1.46733	2.2579e-08	NA
JAZF1	7	28002567	28202567
	7	28200260	28200854	2	CD8 T Cells	0.60396	3.972e-05	JAZF1
IKZF1	7	50306053	50506053
	7	50329687	50330080	1	B Cells	0.846895	0.00028515	NA
	7	50356570	50356948	2	CD4 T Cells	0.66111	7.7131e-05	GRB10
	7	50356570	50356948	2	CD4 T Cells	0.66111	7.7131e-05	IKZF1
CTSB	8	11777675	11977675
	8	11782879	11784118	1	Monocyte	0.811885	1.5119e-06	NA
	8	11782879	11784118	2	Monocyte	0.750013	2.1402e-15	NA
	8	11782879	11784118	3	Monocyte	0.819539	3.6331e-08	NA
MYC	8	127084843	127284843
	8	127216249	127216532	2	Monocyte	1.41028	0.00048036	NA
PVT1	8	127962656	128162656
	8	128041825	128042518	1	Monocyte	1.20462	1.0188e-06	NA
	8	128076569	128077356	1	CD4 T Cells	1.28167	0.00010005	NA
PLGRKT	9	5310286	5510286
	9	5326919	5327601	2	CD8 T Cells	1.37228	2.2291e-05	NA
TRAF1	9	120804499	121004499
	9	120842404	120843478	1	B Cells	0.906615	0.00011765	NA
	9	120842404	120843478	1	CD4 T Cells	0.882178	1.6475e-08	NA
	9	120842404	120843478	3	Monocyte	0.92209	0.00046663	NA
	9	120892300	120893080	2	CD8 T Cells	0.780091	4.9644e-05	NA
	9	120935401	120936764	2	Monocyte	0.880159	0.00061575	NA
IL2RA	10	5952734	6152734
	10	6052320	6053066	1	B Cells	0.901539	0.00019692	NA
	10	6052320	6053066	2	B Cells	0.862925	6.0185e-05	NA
	10	6136209	6136680	2	Monocyte	1.38062	0.00038206	NA
NRP1	10	33037219	33237219
	10	33109570	33110099	2	CD8 T Cells	0.677724	0.00062054	NA
	10	33138915	33139694	3	CD8 T Cells	0.891266	0.0001643	NRP1
	10	33138915	33139694	3	CD8 T Cells	0.891266	0.0001643	EPC1
	10	33138915	33139694	3	CD8 T Cells	0.891266	0.0001643	ITGB1
ZMIZ1	10	79183615	79383615
	10	79331156	79332076	1	CD4 T Cells	0.839081	2.958e-06	PPIF
	10	79331156	79332076	1	CD4 T Cells	0.839081	2.958e-06	ZMIZ1
	10	79331156	79332076	1	CD4 T Cells	0.839081	2.958e-06	ZCCHC24
	10	79331156	79332076	2	CD4 T Cells	0.837721	4.4991e-05	PPIF
	10	79331156	79332076	2	CD4 T Cells	0.837721	4.4991e-05	ZMIZ1
	10	79331156	79332076	2	CD4 T Cells	0.837721	4.4991e-05	ZCCHC24
SLC1A2	11	35167496	35367496
	11	35214747	35215133	1	CD4 T Cells	1.32692	2.2588e-05	CD44
	11	35214747	35215133	1	CD4 T Cells	1.32692	2.2588e-05	SLC1A2
	11	35214747	35215133	1	CD4 T Cells	1.32692	2.2588e-05	ABTB2
	11	35214747	35215133	1	CD4 T Cells	1.32692	2.2588e-05	LDLRAD3
	11	35247277	35248281	1	CD4 T Cells	1.1348	2.3635e-05	NA
CD5	11	60861822	61061822
CD6	11	60861822	61061822
	11	61026186	61026585	2	CD8 T Cells	1.25822	0.00088696	NA
CCDC88B	11	64267826	64467826
	11	64331367	64332320	2	CD8 T Cells	0.778655	0.0009805	EHD1
	11	64331367	64332320	2	CD8 T Cells	0.778655	0.0009805	SF1
	11	64331367	64332320	2	CD8 T Cells	0.778655	0.0009805	FERMT3
	11	64331367	64332320	2	CD8 T Cells	0.778655	0.0009805	FAU
	11	64342394	64342978	1	Monocyte	0.869287	0.00043014	NA
TAPBPL	12	6353119	6553119
	12	6416406	6417417	1	Monocyte	1.19647	0.00029012	PLEKHG6
	12	6416406	6417417	1	Monocyte	1.19647	0.00029012	TNFRSF1A
	12	6471936	6472267	1	Monocyte	1.23894	0.0001617	PLEKHG6
	12	6532274	6532833	1	CD4 T Cells	1.13086	5.9561e-05	GAPDH
	12	6534312	6534832	2	CD8 T Cells	0.854447	0.00078222	GAPDH
RPAP3	12	47714585	47914585
	12	47812830	47813368	2	Monocyte	0.874431	2.8599e-06	NA
	12	47900482	47900769	2	Monocyte	0.798999	2.0686e-05	NA
LMBR1L	12	49007615	49207615
	12	49129466	49131981	2	Monocyte	1.07814	0.00014051	NA
	12	49305973	49306477	2	Monocyte	0.732122	0.00062966	NA
IKZF3	12	55950848	56150848
	12	56041312	56042431	1	B Cells	1.07497	0.00072606	NA
	12	56041312	56042431	1	CD4 T Cells	1.07795	0.00022218	NA
AMDHD1	12	95667078	95867078
	12	95805796	95806190	3	CD8 T Cells	1.56781	4.6101e-05	NA
AKAP11	13	42243795	42443795
	13	42328751	42329015	2	Monocyte	0.565077	0.00066428	NA
TBC1D4	13	75164886	75364886
	13	75219514	75220252	1	CD4 T Cells	1.25312	5.938e-05	NA
GPR183	13	99311911	99511911
	13	99403165	99404326	2	CD8 T Cells	0.684142	7.5443e-06	PCCA
	13	99434114	99434850	1	CD8 T Cells	1.1419	5.7216e-05	DOCK9
	13	99434114	99434850	1	Monocyte	1.30123	3.6429e-05	DOCK9
ZFP36L1	14	68692124	68892124
	14	68741401	68742445	2	Monocyte	0.914276	0.00057075	SUSD6
	14	68741401	68742445	2	Monocyte	0.914276	0.00057075	DCAF5
	14	68795199	68796375	2	Monocyte	0.887344	2.7486e-05	NA
RIN3	14	92537727	92737727
	14	92568384	92569487	2	B Cells	1.21809	9.4113e-06	NA
	14	92686666	92687141	1	CD4 T Cells	0.794508	0.00039766	NA
AL163932.1	14	97932614	98132614
	14	98018624	98018951	1	CD4 T Cells	1.23027	0.00025036	NA
RASGRP1	15	38570555	38770555
	15	38576638	38577198	2	CD8 T Cells	0.592472	8.9529e-08	NA
	15	38670232	38671084	2	Monocyte	1.39154	0.00116141	RASGRP1
	15	38670232	38671084	2	Monocyte	1.39154	0.00116141	THBS1
TUFM	16	28896971	29096971
	16	28930711	28930982	1	B Cells	0.832366	0.00071292	NA
	16	28984323	28985261	1	Monocyte	1.12072	0.0002635	NA
MAPK3	16	30023335	30223335
	16	30182987	30184707	1	B Cells	1.07172	0.00063689	NA
	16	30185339	30188463	2	CD8 T Cells	0.881385	0.00015996	ITGAL
BRD7	16	50222085	50422085
	16	50335111	50335831	2	B Cells	0.683022	3.035e-05	BRD7
	16	50335111	50335831	2	CD4 T Cells	0.757828	3.2462e-07	BRD7
	16	50338349	50339375	2	CD8 T Cells	0.77973	0.00010528	BRD7
	16	53822789	53823477	2	Monocyte	2.01841	5.382e-07	NA
CDH1	16	67970519	68170519
	16	68005411	68006324	1	B Cells	1.18608	0.00058191	NA
BCAR1	16	75112137	75312137
	16	75305196	75305744	2	CD8 T Cells	1.58551	0.00031806	NA
AC092384.1	16	88823102	89023102
	16	88967883	88968493	2	Monocyte	0.783783	0.00016712	CBFA2T3
CYB5D2	17	3898208	4098208
	17	3904164	3905440	3	B Cells	0.851964	2.3191e-05	ATP2A3
	17	3904164	3905440	3	B Cells	0.851964	2.3191e-05	CAMKK1
	17	3904164	3905440	3	B Cells	0.851964	2.3191e-05	P2RX5
	17	3964937	3965329	2	Monocyte	0.848248	0.00083714	NA
GSDMB	17	39810119	40010119
	17	39939528	39940371	1	B Cells	0.857328	0.00012766	NA
	17	39939528	39940371	3	CD8 T Cells	0.769777	2.7384e-05	NA
CCR7	17	40523690	40723690
	17	40533273	40533745	1	B Cells	1.10618	0.00014478	NA
	17	40577493	40578022	1	CD4 T Cells	0.760392	2.7609e-06	CCR7
	17	40614965	40615716	1	CD4 T Cells	0.872564	0.00018584	CCR7
	17	40614965	40615716	1	CD4 T Cells	0.872564	0.00018584	IKZF3
MAP3K14	17	45214842	45414842
	17	45247011	45248867	3	CD8 T Cells	1.08771	0.00013856	NA
PTPN2	18	12718923	12918923
	18	12775556	12776239	1	CD4 T Cells	1.21607	0.00022454	NA
	18	12903991	12904372	2	CD8 T Cells	0.525146	3.5366e-05	NA
SMAD7	18	48830726	49030726
	18	48842532	48842979	2	CD8 T Cells	0.778112	0.00023778	SMAD7
	18	48868416	48869514	2	CD8 T Cells	0.772607	6.9492e-05	CTIF
	18	48868416	48869514	2	Monocyte	1.09684	5.8839e-05	CTIF
CD226	18	69769260	69969260
	18	69958464	69958769	3	Monocyte	0.841255	0.00010657	CD226
TYK2	19	10217045	10417045
	19	10269428	10271966	1	B Cells	0.944657	0.0005485	ICAM1
	19	10269428	10271966	1	B Cells	0.944657	0.0005485	PDE4A
	19	10269428	10271966	1	B Cells	0.944657	0.0005485	CDC37
	19	10269428	10271966	1	B Cells	0.944657	0.0005485	LDLR
	19	10269428	10271966	1	B Cells	0.944657	0.0005485	SLC44A2
	19	10269428	10271966	1	CD4 T Cells	1.09502	0.0004068	ICAM1
	19	10269428	10271966	1	CD4 T Cells	1.09502	0.0004068	PDE4A
	19	10269428	10271966	1	CD4 T Cells	1.09502	0.0004068	CDC37
	19	10269428	10271966	1	CD4 T Cells	1.09502	0.0004068	LDLR
	19	10269428	10271966	1	CD4 T Cells	1.09502	0.0004068	SLC44A2
PRDK2	19	46605224	46805224
	19	46619710	46620094	1	CD4 T Cells	0.845932	0.00012737	NA
SIRPG	20	1534898	1734898
	20	1587930	1588934	3	CD4 T Cells	1.69001	2.3485e-06	SIRPB1
	20	1587930	1588934	2	Monocyte	0.750458	1.9082e-07	SIRPB1
	20	1587930	1588934	3	Monocyte	1.49785	7.0127e-13	SIRPB1
	20	1897688	1898321	1	B Cells	0.896691	5.9171e-05	NA
PROCR	20	35066801	35266801
	20	35085378	35086094	1	CD8 T Cells	0.729846	1.2632e-05	NA
	20	35251399	35252589	2	CD8 T Cells	0.780816	0.0001597	NA
UBASH3A	21	42316077	42516077
	21	42414655	42415640	1	CD4 T Cells	0.918902	0.0001123	NA
C1QTNF6	22	37089696	37289696
	22	37162425	37162927	1	B Cells	1.26178	0.00018339	IL2RB
